# Supplementary material
Source: PubMed Central journal article supplement (PMC2975595)

**Supporting Information for: Palladium-Catalyzed Dynamic Kinetic  
Asymmetric Transformations of Vinyl Aziridines with Nitrogen Heterocycles:  
Rapid Access to Biologically Active Pyrroles and Indoles**

Barry M. Trost\* Maksim Osipov and Guangbin Dong

*Department of Chemistry, Stanford University, Stanford, CA 94305-5080 (USA)*

**Supporting Information**

**Table of Contents**

|                                                          |    |
|----------------------------------------------------------|----|
| I. Experimental Procedures .....                         | 2  |
| II. <sup>1</sup> H and <sup>13</sup> C NMR spectra ..... | 20 |

**General:**

1,2 dichloroethane was distilled from calcium hydride. All other anhydrous solvents were obtained from elution through alumina columns and degassed using the freeze-pump-thaw technique unless stated otherwise. Commercial reagents were used without further purification unless stated otherwise. Reactions were run under nitrogen or argon atmosphere and anhydrous conditions. TLC was performed on precoated glass plates (Merck). Flash chromatography was performed with silica gel 60, 230-400 mesh. <sup>1</sup>H-NMR (0 ppm for tetramethylsilane as internal standard) and <sup>13</sup>C-NMR (77.5 ppm for CDCl<sub>3</sub> as internal standard) spectra were recorded on Varian UI- 600 (600 MHz), UI-500 (500 MHz) or Varian MERC-400 (400 MHz). IR spectra (cm<sup>-1</sup>) were obtained with a Perkin-Elmer FT-IR Paragon 500 spectrometer or a Thermo Scientific Nicolet IR 100 FT-IR spectrometer using neat sample on a NaCl pad. Enantiomeric excess was determined using chiral HPLC analyses on a Thermo Separation Products Spectra Series P-100 or 200 and UV100 (254 nm) using Chiralcel® columns (OD-H, OB-H, AD-H, OJ-H OD, OB, OJ, AD, As, OC, IA, IB or IC) eluting with heptane / *iso*-propanol mixtures indicated. Optical rotations were measured on a Jasco DIP-1000 digital polarimeter using 5 cm cells and the sodium D line (589 nm) at ambient temperature in the solvent and concentration indicated.

---

**General procedure for a pyrrole AAA reaction:**

To a flame-dried microwave vial equipped with a magnetic stir bar was added nitrogen heterocycle (0.2 mmol) and vinyl aziridine (0.22 mmol). The system was evacuated and filled with argon (3x) and dry degassed DCE (0.4 mL) was then added. In a separate flame-dried microwave vial equipped with a magnetic stir bar was added Pd<sub>2</sub>(dba)<sub>3</sub>•CHCl<sub>3</sub> (4.1 mg, 4.0x10<sup>-3</sup> mmol) and (*R,R*)-**L2** (9.5 mg, 0.012 mmol). The system was evacuated and filled with argon (3x), and DCE (0.4 mL) was added. This vial was stirred at rt for 15-20 min until a bright orange color persisted and its contents were then cannulated to the first vial. The reaction mixture was stirred for 48 h at rt, diluted with CH<sub>2</sub>Cl<sub>2</sub> (10 mL) and then poured onto water (10 mL). The organic layer was separated, and the aqueous layer was extracted with CH<sub>2</sub>Cl<sub>2</sub> (3x10 mL). The

combined organic fractions were dried over anhydrous sodium sulfate, filtered and concentrated *en vacuo*. The crude reaction mixture was purified by flash column chromatography on silica gel.

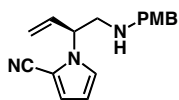

**(S)-1-(1-(4-methoxybenzylamino)but-3-en-2-yl)-1H-pyrrole-2-carbonitrile (3a)**

Purified by column chromatography (30% ethyl acetate/petroleum ether) to provide 56 mg of a yellow oil (99% yield, 89 %ee by HPLC, OJ-H column, 9:1 heptane/*i*-propanol, 1.0mL/min, 254 nm, *rt* = 27.4, 30.2 min).  $R_f$  = 0.30 (30% ethyl acetate/petroleum ether).  $^1\text{H-NMR}$  ( $\text{CDCl}_3$ , 400 MHz):  $\delta$  7.20-7.17 (m, 2H), 6.92 (dd,  $J$  = 2.6, 1.7 Hz, 1H), 6.86-6.84 (m, 2H), 6.82 (dd,  $J$  = 3.9, 1.6 Hz, 1H), 6.22 (dd,  $J$  = 3.9, 2.8 Hz, 1H), 5.97 (ddd,  $J$  = 17.1, 10.5, 5.9 Hz, 1H), 5.28 (ddd,  $J$  = 10.5, 1.3, 0.7 Hz, 1H), 5.10 (ddd,  $J$  = 17.2, 1.5, 0.7 Hz, 1H), 4.97-4.92 (m, 1H), 3.79 (s, 3H), 3.72 (q,  $J$  = 12.2 Hz, 2H), 3.13-3.03 (m, 2H), 1.35 (s, 1H).  $^{13}\text{C-NMR}$  ( $\text{CDCl}_3$ , 101 MHz):  $\delta$  159.2, 135.3, 132.2, 129.7, 124.7, 120.5, 119.0, 114.4, 114.3, 110.3, 104.3, 61.5, 55.7, 53.1, 52.5. **IR**(film): 3335, 3123, 2917, 2836, 2214, 1610, 1511, 1457  $\text{cm}^{-1}$ .  $[\alpha]_D$  -31.7 ( $\text{CH}_2\text{Cl}_2$ , *c* 1.00). **HRMS** ( $\text{C}_{17}\text{H}_{19}\text{N}_3\text{O}$ ): calculated ( $M + \text{Na}$ ): 304.1426, found ( $M + \text{Na}$ ): 304.1428.

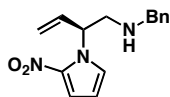

**(S)-N-benzyl-2-(2-nitro-1H-pyrrol-1-yl)but-3-en-1-amine (3b)**

Purified by column chromatography (25% ethyl acetate/petroleum ether) to provide 42 mg of an oil (77% yield, 89% ee by HPLC, OD column, 98:2 heptane/*i*-propanol, 0.8mL/min, 254 nm, *rt* = 23.1, 25.3 min).  $R_f$  = 0.30 (25% ethyl acetate/petroleum ether).  $^1\text{H-NMR}$  ( $\text{CDCl}_3$ , 400 MHz):  $\delta$  7.32-7.22 (m, 6H), 7.04 (t,  $J$  = 2.4 Hz, 1H), 6.21 (dd,  $J$  = 4.2, 3.0 Hz, 1H), 6.03-5.95 (m, 2H), 5.27 (d,  $J$  = 9.2 Hz, 1H), 5.12-5.06 (m, 1H), 3.81-3.73 (m, 2H), 3.10-3.01 (m, 2H), 1.44 (s, 1H).  $^{13}\text{C-NMR}$  ( $\text{CDCl}_3$ , 101 MHz):  $\delta$  140.1, 135.5, 128.9, 128.4, 127.6, 126.9, 119.0, 115.6, 109.4, 59.9, 53.8, 52.6. **IR** (film): 3131, 3025, 2838, 1529, 1500, 1454, 1347, 739  $\text{cm}^{-1}$ .  $[\alpha]_D$  -55.2 ( $\text{CH}_2\text{Cl}_2$ , *c* 1.09). **HRMS** ( $\text{C}_{15}\text{H}_{17}\text{N}_3\text{O}_2$ ): calculated ( $M + \text{H}$ ): 272.1399, found ( $M + \text{H}$ ): 272.1387.

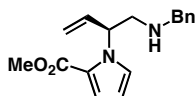

**(S)-methyl 1-(1-(benzylamino)but-3-en-2-yl)-1H-pyrrole-2-carboxylate (3c)**

Purified by column chromatography (25% ethyl acetate/petroleum ether) to provide 43.4 mg of a yellow oil (76 % yield, 96 %ee by HPLC, AD column, 95:5 heptane/*i*-propanol, 0.8mL/min, 254 nm, rt = 8.3, 9.1 min).  $R_f = 0.30$  (25% ethyl acetate/petroleum ether).  **$^1\text{H-NMR}$**  ( $\text{CDCl}_3$ , 400 MHz):  $\delta$  7.32-7.21 (m, 5H), 6.99 (ddd,  $J = 5.8, 4.1, 1.7$  Hz, 2H), 6.19 (dd,  $J = 3.8, 2.8$  Hz, 1H), 6.15-6.10 (m, 1H), 6.00 (ddd,  $J = 16.9, 10.7, 6.0$  Hz, 1H), 5.21-5.18 (m, 1H), 5.04 (dt,  $J = 17.1, 1.1$  Hz, 1H), 3.82-3.74 (m, 5H), 3.08-3.00 (m, 2H), 1.39 (s, 1H)..  **$^{13}\text{C-NMR}$**  ( $\text{CDCl}_3$ , 101 MHz):  $\delta$  162.2, 140.5, 137.0, 128.8, 128.5, 127.4, 125.8, 122.7, 118.6, 117.6, 109.2, 58.5, 53.6, 53.1, 51.5. **IR** (film): 25, 2945, 1702, 1643, 1545, 1456, 1436, 1341, 1234, 1108, 740, 700  $\text{cm}^{-1}$ .  **$[\alpha]_D$** :  $-12.5$  ( $\text{CH}_2\text{Cl}_2$ , c 1.03). **HRMS** ( $\text{C}_{17}\text{H}_{21}\text{N}_2\text{O}_2$ ): calculated (M + H): 285.1603, found (M + H): 285.1595.

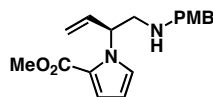

**(S)-methyl 1-(1-(4-methoxybenzylamino)but-3-en-2-yl)-1H-pyrrole-2-carboxylate (3d)**

Purified by column chromatography (30% ethyl acetate/petroleum ether) to provide 54 mg of a yellow oil (86% yield, 94%ee by HPLC, OD column, 9:1 heptane/*i*-propanol, 0.8mL/min, 254 nm, rt = 9.8, 12.4 min).  $R_f = 0.30$  (30% ethyl acetate/petroleum ether).  **$^1\text{H-NMR}$**  ( $\text{CDCl}_3$ , 400 MHz):  $\delta$  7.19-7.15 (m, 2H), 7.01-6.98 (m, 2H), 6.86-6.82 (m, 2H), 6.19 (dd,  $J = 3.9, 2.7$  Hz, 1H), 6.14-6.09 (m, 1H), 6.00 (ddd,  $J = 17.1, 10.4, 5.8$  Hz, 1H), 5.19 (dt,  $J = 10.4, 1.2$  Hz, 1H), 5.04 (dt,  $J = 17.1, 1.3$  Hz, 1H), 3.81 (s, 3H), 3.79 (s, 3H), 3.76-3.68 (m, 2H), 3.07-2.98 (m, 2H), 1.44 (s, 1H).  **$^{13}\text{C-NMR}$**  ( $\text{CDCl}_3$ , 101 MHz):  $\delta$  162.2, 159.1, 137.1, 132.6, 129.7, 125.8, 122.7, 118.6, 117.6, 114.2, 109.2, 58.5, 55.7, 53.0, 51.5. **IR** (film): 2949, 2835, 1703, 1512, 1460, 1438, 1412  $\text{cm}^{-1}$ .  **$[\alpha]_D$** : 0.9 ( $\text{CH}_2\text{Cl}_2$ , c 1.04). **HRMS** ( $\text{C}_{17}\text{H}_{22}\text{N}_2\text{O}_3\text{Na}$ ): calculated (M + Na): 337.1523, found (M + Na): 337.1528.

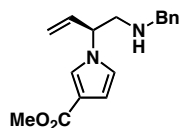

**(S)-methyl 1-(1-(benzylamino)but-3-en-2-yl)-1H-pyrrole-3-carboxylate (3e)**

Purified by column chromatography (35% ethyl acetate/petroleum ether) to provide 41 mg of an oil (72% yield, 89% ee by HPLC, OD column, 9:1 heptane/*i*-propanol, 0.8mL/min, 254 nm, rt = 17.7, 20.1 min).  $R_f = 0.30$  (40% ethyl acetate/petroleum ether).  **$^1\text{H-NMR}$**  (400 MHz):  $\delta$  7.35 (t,  $J = 1.9$  Hz, 1H), 7.34-7.23 (m, 5H), 6.65 (t,  $J = 2.6$  Hz, 1H), 6.61 (dd,  $J = 2.9, 1.7$  Hz, 1H), 5.94 (ddd,  $J = 17.1, 10.6, 6.0$  Hz, 1H), 5.25-5.22 (m, 1H), 5.09 (ddd,  $J = 17.2, 1.3, 0.8$  Hz, 1H), 4.66-4.61 (m, 1H), 3.80 (s, 3H), 3.77-3.73 (m, 2H), 3.06-2.97 (m, 2H), 1.35 (s, 1H).  **$^{13}\text{C-NMR}$**  ( $\text{CDCl}_3$ , 101 MHz):  $\delta$  165.7, 140.1, 135.9, 128.9, 128.4, 127.6, 125.2, 121.0, 118.4, 116.4, 110.6, 62.9, 53.9, 52.9, 51.5 **IR** (film): 3024, 2945, 2839, 1706, 1539, 1452, 1458, 1360, 1197, 1118  $\text{cm}^{-1}$ .  $[\alpha]_D$ : -23.0 ( $\text{CH}_2\text{Cl}_2$ , c 1.03). **HRMS** ( $\text{C}_{17}\text{H}_{21}\text{N}_2\text{O}_2$ ): calculated (M + H): 285.1603, found (M + H): 285.1598.

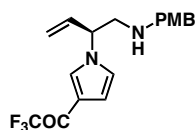

**(S)-2,2,2-trifluoro-1-(1-(1-((4-methoxybenzyl)amino)but-3-en-2-yl)-1H-pyrrol-3-yl)ethanone (3f)**

Purified by column chromatography (35% ethyl acetate/petroleum ether) to provide 65 mg of a clear oil (92% yield, 93 % ee by HPLC, OB column, 8:2 heptane/*i*-propanol, 0.8mL/min, 254 nm, rt = 18.2, 30.9 min).  $R_f = 0.30$  (35% ethyl acetate/petroleum ether).  **$^1\text{H-NMR}$**  ( $\text{CDCl}_3$ , 400MHz):  $\delta$  7.57 (d,  $J = 1.0$  Hz, 1H), 7.18-7.14 (m, 2H), 6.87-6.84 (m, 2H), 6.77 (d,  $J = 1.0$  Hz, 1H), 6.74 (dd,  $J = 3.0, 2.1$  Hz, 1H), 5.95 (ddd,  $J = 17.0, 10.7, 6.2$  Hz, 1H), 5.32-5.29 (m, 1H), 5.13 (dt,  $J = 17.2, 0.7$  Hz, 1H), 4.68-4.63 (m, 1H), 3.80 (s, 3H), 3.75-3.68 (m, 2H), 3.04-3.02 (m, 2H), 1.33 (s, 1H).  **$^{13}\text{C-NMR}$**  ( $\text{CDCl}_3$ , 101 MHz):  $\delta$  159.3, 135.2, 132.0, 129.6, 128.9, 122.6, 119.2, 118.9, 118.3, 116.0, 114.3, 111.4, 63.4, 55.7, 53.4, 52.6. **IR** (film): 3350, 2931, 2835, 1683, 1528, 1512, 1247, 1190, 1143, 880  $\text{cm}^{-1}$ .  $[\alpha]_D$ : -20.6 ( $\text{CH}_2\text{Cl}_2$ , c 1.29). **HRMS** ( $\text{C}_{18}\text{H}_{20}\text{N}_2\text{O}_2\text{F}_3$ ): calculated (M + H): 353.1477, found (M + H): 353.1471.

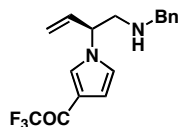

**(S)-1-(1-(1-(benzylamino)but-3-en-2-yl)-1H-pyrrol-3-yl)-2,2,2-trifluoroethanone (3g)**

Purified by column chromatography (30% ethyl acetate/petroleum ether) to provide 61 mg of an oil (95% yield, 93 % ee by HPLC, OD-H column, 9:1 heptane/*i*-propanol, 0.8mL/min, 254 nm, rt

= 19.5, 25.2 min).  $R_f = 0.30$  (30% ethyl acetate/petroleum ether).  $^1\text{H-NMR}$  (400 MHz):  $\delta$  7.58 (d,  $J = 1.0$  Hz, 1H), 7.34-7.24 (m, 5H), 6.78-6.77 (m, 1H), 6.75 (dd,  $J = 3.1, 2.1$  Hz, 1H), 5.96 (ddd,  $J = 17.1, 10.5, 6.0$  Hz, 1H), 5.31 (ddd,  $J = 10.5, 1.3, 0.6$  Hz, 1H), 5.13 (ddd,  $J = 17.2, 1.5, 0.6$  Hz, 1H), 4.69-4.64 (m, 1H), 3.82-3.74 (m, 2H), 3.06-3.04 (m, 2H), 1.39 (s, 1H).  $^{13}\text{C-NMR}$  ( $\text{CDCl}_3$ , 101 MHz):  $\delta$  175.8, 139.9, 135.1, 129.0, 128.4, 127.7, 122.6, 119.2, 118.9, 118.3, 116.0, 111.4, 63.4, 54.0, 52.7. **IR** (film): 2921, 2838, 1684, 1529, 1248, 1191, 1144, 880, 761, 732, 699  $\text{cm}^{-1}$ .  $[\alpha]_D$ : -22.2 ( $\text{CH}_2\text{Cl}_2$ , c 1.11). **HRMS** ( $\text{C}_{17}\text{H}_{18}\text{N}_2\text{O}_1 \text{F}_3$ ): calculated (M + H): 323.1371, found (M + H): 323.1366.

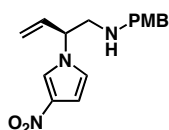

**(S)-N-(4-methoxybenzyl)-2-(3-nitro-1H-pyrrol-1-yl)but-3-en-1-amine (3h)**

Purified by column chromatography (30% ethyl acetate/petroleum ether) to provide 50.8 mg of a yellow oil (78% yield, 90% ee by HPLC, OD column, 9:1 heptane/*i*-propanol, 0.8mL/min, 254 nm, rt = 31.3, 34.0 min)..  $R_f = 0.30$  (30% ethyl acetate/petroleum ether).  $^1\text{H-NMR}$  ( $\text{CDCl}_3$ , 400 MHz):  $\delta$  7.58 (t,  $J = 2.1$  Hz, 1H), 7.18-7.15 (m, 2H), 6.88-6.84 (m, 2H), 6.73 (dd,  $J = 3.2, 1.8$  Hz, 1H), 6.62 (dd,  $J = 3.1, 2.6$  Hz, 1H), 5.93 (ddd,  $J = 17.1, 10.5, 6.1$  Hz, 1H), 5.31 (dt,  $J = 10.5, 0.7$  Hz, 1H), 5.14 (ddd,  $J = 17.2, 1.5, 0.6$  Hz, 1H), 4.62-4.57 (m, 1H), 3.80 (s, 3H), 3.72 (d,  $J = 2.2$  Hz, 2H), 3.02 (d,  $J = 6.8$  Hz, 2H).  $^{13}\text{C-NMR}$  ( $\text{CDCl}_3$ , 101 MHz):  $\delta$  159.3, 135.0, 131.9, 129.7, 121.2, 120.9, 119.4, 114.36, 114.36, 106.1, 63.6, 55.7, 53.4, 52.5. **IR**(film): 3138, 2929, 2834, 1619, 1527, 1510, 1485, 1368, 1286, 1246, 1175, 1120, 1032, 810, 751  $\text{cm}^{-1}$ .  $[\alpha]_D$ : -15.3 ( $\text{CH}_2\text{Cl}_2$ , c 1.02). **HRMS** ( $\text{C}_{16}\text{H}_{20}\text{N}_3\text{O}_3$ ): calculated (M + H): 302.1505, found (M + H): 302.1499.

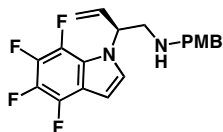

**(S)-N-(4-methoxybenzyl)-2-(4,5,6,7-tetrafluoro-1H-indol-1-yl)but-3-en-1-amine (4a)**

Purified by silica gel flash chromatography. (30% ethyl acetate in petroleum ether) to provide 69 mg of a yellow oil (89% yield, 90% ee by HPLC, AD-H column, 99.5:0.5 heptane/*i*-propanol, 0.8 mL/min, 254 nm, rt = 20.6, 23.9 min.)  $R_f = 0.3$  (30% ethyl acetate/petroleum ether).  $^1\text{H-NMR}$  ( $\text{CDCl}_3$ , 400 MHz):  $\delta$  7.19 (d,  $J = 3.3$  Hz, 1H), 7.15-7.11 (m, 2H), 6.84-6.82 (m, 2H),

6.63 (dd,  $J = 3.3, 1.9$  Hz, 1H), 6.00 (dddd,  $J = 17.1, 10.5, 5.8, 0.8$  Hz, 1H), 5.32 (q,  $J = 6.6$  Hz, 1H), 5.25-5.22 (m, 1H), 5.03 (dd,  $J = 17.2, 0.7$  Hz, 1H), 3.79 (s, 3H), 3.72 (q,  $J = 10.0$  Hz, 2H), 3.13-3.10 (m, 2H), 1.44 (s, 1H).  $^{13}\text{C-NMR}$  ( $\text{CDCl}_3$ , 101 MHz):  $\delta$  159.2, 136.0, 132.2, 129.6, 127.81, 127.78, 118.3, 114.2, 99.72, 99.67, 77.5, 60.57, 60.51, 55.7, 53.3, 52.4. **IR** (film): 2933, 2834, 1611, 1538, 1511, 1486, 1341, 1301, 1246, 1177, 1034, 997, 713  $\text{cm}^{-1}$ .  $[\alpha]_D^{22}$ :  $-29.1$  ( $\text{CH}_2\text{Cl}_2$ ,  $c$  1.10). **HRMS** ( $\text{C}_{20}\text{H}_{19}\text{N}_2\text{O}_1\text{F}_4$ ): calculated (M + H): 379.1434, found (M + H): 379.1428.

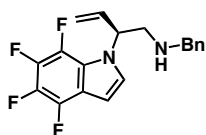

**(S)-N-benzyl-2-(4,5,6,7-tetrafluoro-1H-indol-1-yl)but-3-en-1-amine (4b)**

Purified by column chromatography (20% ethyl acetate/petroleum ether) to provide 67 mg of an oil (96% yield, 92% ee by HPLC, OD column, 9:1 heptane/*i*-propanol, 0.8mL/min, 254 nm,  $r_t = 14.9, 18.8$  min).  $R_f = 0.30$  (20% ethyl acetate/petroleum ether).  $^1\text{H-NMR}$  ( $\text{CDCl}_3$ , 400 MHz):  $\delta$  7.31-7.19 (m, 6H), 6.63 (dd,  $J = 3.3, 1.9$  Hz, 1H), 6.05-5.96 (m, 1H), 5.36-5.31 (m, 1H), 5.24 (ddd,  $J = 10.5, 1.3, 0.9$  Hz, 1H), 5.05-5.01 (m, 1H), 3.82-3.74 (m, 2H), 3.18-3.08 (m, 2H), 1.38 (s, 1H).  $^{13}\text{C-NMR}$  ( $\text{CDCl}_3$ , 101 MHz):  $\delta$  140.1, 136.0, 128.9, 128.4, 127.79, 127.76, 127.61, 118.3, 99.75, 99.71, 60.57, 60.51, 53.9, 52.6. **IR** (film): 1538, 1507, 1486, 1341, 997  $\text{cm}^{-1}$ .  $[\alpha]_D^{22}$ :  $-30.0$  ( $\text{CH}_2\text{Cl}_2$ ,  $c$  1.12). **HRMS** ( $\text{C}_{19}\text{H}_{17}\text{N}_2\text{F}_4$ ): calculated (M + H): 349.1328, found (M + H): 349.1322.

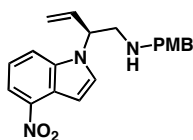

**(S)-N-(4-methoxybenzyl)-2-(4-nitro-1H-indol-1-yl)but-3-en-1-amine (4c)**

Purified by silica gel flash chromatography (35% ethyl acetate in petroleum ether) to provide 60.2 mg of a yellow oil (86% yield, 93% ee by HPLC, IB column, 75:25 heptane/*i*-propanol, 1.0 mL/min, 254 nm,  $r_t = 10.8, 20.6$  min)  $R_f$ : 0.3 (40% ethyl acetate/petroleum ether).  $^1\text{H-NMR}$  ( $\text{CDCl}_3$ , 400 MHz):  $\delta$  8.13 (dd,  $J = 8.0, 0.7$  Hz, 1H), 7.67 (d,  $J = 8.2$  Hz, 1H), 7.45 (d,  $J = 3.2$  Hz, 1H), 7.30 (dd,  $J = 3.2, 0.7$  Hz, 1H), 7.24 (t,  $J = 8.1$  Hz, 1H), 7.13-7.10 (m, 2H), 6.84-6.80

(m, 2H), 6.02 (ddd,  $J = 17.2, 10.5, 5.4$  Hz, 1H), 5.25 (ddd,  $J = 10.5, 1.6, 0.7$  Hz, 1H), 5.13 (dtt,  $J = 7.7, 5.8, 1.7$  Hz, 1H), 5.03 (ddd,  $J = 17.2, 1.7, 0.7$  Hz, 1H), 3.78 (s, 3H), 3.70 (q,  $J = 10.0$  Hz, 2H), 3.23-3.13 (m, 2H), 1.41 (s, 1H).  $^{13}\text{C-NMR}$  ( $\text{CDCl}_3$ , 101 MHz):  $\delta$  159.2, 140.9, 138.8, 135.5, 132.1, 130.2, 129.6, 123.1, 120.9, 118.4, 118.1, 117.1, 114.3, 103.1, 59.3, 55.7, 53.4, 52.0. **IR (film)**: 3106, 2932, 2834, 1611, 1513, 1463  $\text{cm}^{-1}$ .  $[\alpha]_{\text{D}}$ : -12.9 ( $\text{CH}_2\text{Cl}_2$ , c 1.25). **HRMS** ( $\text{C}_{20}\text{H}_{21}\text{N}_3\text{O}_3\text{Na}$ ): calculated (M + Na): 374.1481, found (M + Na): 374.1476.

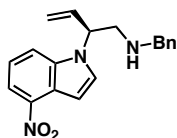

**(S)-N-benzyl-2-(4-nitro-1H-indol-1-yl)but-3-en-1-amine (4d)**

Purified by silica gel flash chromatography (30% ethyl acetate in petroleum ether) to provide 55.3 mg of a yellow oil (86% yield, 86% ee by HPLC, OD-H column, 9:1 heptane/*i*-propanol, 0.8 mL/min, 254 nm, rt = 20.3, 35.0 min)  $R_f$ : 0.3 (30% ethyl acetate/petroleum ether).  $^1\text{H-NMR}$  ( $\text{CDCl}_3$ , 400 MHz):  $\delta$  8.13 (dd,  $J = 8.0, 0.6$  Hz, 1H), 7.67 (d,  $J = 8.2$  Hz, 1H), 7.45 (d,  $J = 3.2$  Hz, 1H), 7.31-7.19 (m, 7H), 6.02 (ddd,  $J = 17.2, 10.5, 5.4$  Hz, 1H), 5.25 (ddd,  $J = 10.5, 1.5, 0.6$  Hz, 1H), 5.16-5.11 (m, 1H), 5.04 (ddd,  $J = 17.2, 1.6, 0.6$  Hz, 1H), 3.81-3.73 (m, 2H), 3.24-3.14 (m, 2H), 1.47 (s, 1H).  $^{13}\text{C-NMR}$  ( $\text{CDCl}_3$ , 101 MHz):  $\delta$  140.9, 140.0, 138.8, 135.4, 130.2, 128.94, 128.90, 128.4, 127.6, 123.1, 120.9, 118.5, 118.13, 118.10, 117.1, 103.1, 59.3, 54.0, 52.1. **IR** (film): 3352, 2919, 2832, 1512, 1496, 1360, 1328, 1301, 1252, 736  $\text{cm}^{-1}$ .  $[\alpha]_{\text{D}}$ : -16.1 ( $\text{CH}_2\text{Cl}_2$ , c. 1.05). **HRMS** ( $\text{C}_{19}\text{H}_{20}\text{N}_3\text{O}_2$ ): calculated (M + H): 322.3810, found (M + H): 322.1550.

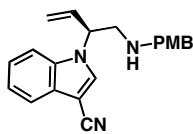

**(S)-1-(1-(4-methoxybenzylamino)but-3-en-2-yl)-1H-indole-3-carbonitrile (4e)**

Purified by silica gel flash chromatography. (35% ethyl acetate in petroleum ether) to provide 45 mg of a yellow oil (92% yield, 89% ee by HPLC, IB column, 9:1 heptane/*i*-propanol, 0.8 mL/min, 254 nm, rt = 20.9, 26.2 min.)  $R_f$  = 0.3 (40% ethyl acetate/petroleum ether).  $^1\text{H-NMR}$  ( $\text{CDCl}_3$ , 500 MHz):  $\delta$  7.77-7.75 (m, 1H), 7.73 (s, 1H), 7.39 (dd,  $J = 6.7, 1.9$  Hz, 1H), 7.32-7.27 (m, 2H), 7.14-7.11 (m, 2H), 6.85-6.82 (m, 2H), 5.99 (ddd,  $J = 17.5, 10.5, 5.3$  Hz, 1H), 5.30-5.28



(m, 1H), 5.08-5.04 (m, 2H), 3.79 (s, 3H), 3.70 (q,  $J = 10.3$  Hz, 2H), 3.15 (qd,  $J = 12.1, 6.5$  Hz, 2H), 1.38 (s, 1H).  $^{13}\text{C-NMR}$  ( $\text{CDCl}_3$ , 126 MHz):  $\delta$  159.2, 135.9, 134.7, 133.5, 131.9, 129.7, 128.2, 124.2, 122.7, 120.4, 119.1, 116.4, 114.3, 111.4, 86.7, 59.6, 55.7, 53.4, 51.7. **IR** (film): 2835, 2217, 1611, 1528, 1512, 1461  $\text{cm}^{-1}$ .  $[\alpha]_D^{22}$ :  $-26.0$  ( $\text{CH}_2\text{Cl}_2$ ,  $c$  1.10). **HRMS** ( $\text{C}_{21}\text{H}_{21}\text{N}_3\text{ONa}$ ): calculated ( $\text{M} + \text{Na}$ ): 354.1584, found ( $\text{M} + \text{Na}$ ): 354.1582.

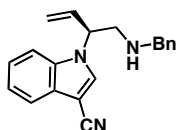

**(S)-1-(1-(benzylamino)but-3-en-2-yl)-1H-indole-3-carbonitrile (4f)**

Purified by silica gel flash chromatography. (30% ethyl acetate in petroleum ether) to provide 53 mg of a yellow oil (88% yield, 90% ee by HPLC, OD-H column, 9:1 heptane/*i*-propanol, 0.8 mL/min, 254 nm,  $r_t = 20.6, 27.5$  min.)  $R_f = 0.3$  (30% ethyl acetate/petroleum ether).  $^1\text{H-NMR}$  ( $\text{CDCl}_3$ , 400 MHz):  $\delta$  7.77-7.74 (m, 2H), 7.41-7.38 (m, 1H), 7.33-7.20 (m, 6H), 5.99 (ddd,  $J = 17.4, 10.6, 5.4$  Hz, 1H), 5.31-5.28 (m, 1H), 5.10-5.04 (m, 2H), 3.80-3.73 (m, 2H), 3.22-3.12 (m, 2H), 1.48 (s, 1H).  $^{13}\text{C-NMR}$  ( $\text{CDCl}_3$ , 101 MHz):  $\delta$  139.8, 135.9, 134.7, 133.5, 129.0, 128.5, 128.2, 127.7, 124.2, 122.7, 120.4, 119.2, 116.4, 111.4, 86.7, 59.6, 54.0, 51.8. **IR** (film): 3026, 2920, 2837, 2216, 1527, 1460, 1399, 1356, 1232, 1183, 756  $\text{cm}^{-1}$ .  $[\alpha]_D^{22}$ :  $-24.3$  ( $\text{CH}_2\text{Cl}_2$ ,  $c$  1.01). **HRMS** ( $\text{C}_{20}\text{H}_{20}\text{N}_3$ ): calculated ( $\text{M} + \text{H}$ ): 302.1675, found ( $\text{M} + \text{H}$ ): 302.1652.

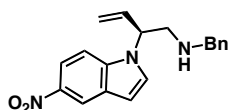

**(S)-N-benzyl-2-(5-nitro-1H-indol-1-yl)but-3-en-1-amine (4g)**

Purified by silica gel flash chromatography. (40% ethyl acetate in petroleum ether) to provide 52 mg of a yellow oil (81% yield, 83% ee by HPLC, AD-H column, 9:1 heptane/*i*-propanol, 0.8 mL/min, 254 nm,  $r_t = 17.7, 20.5$  min.)  $R_f = 0.3$  (35% ethyl acetate/petroleum ether).  $^1\text{H-NMR}$  (400 MHz):  $\delta$  8.58 (d,  $J = 2.2$  Hz, 1H), 8.08 (dd,  $J = 9.1, 2.2$  Hz, 1H), 7.37-7.19 (m, 8H), 6.73 (d,  $J = 3.3$  Hz, 1H), 6.02 (ddd,  $J = 17.2, 10.5, 5.4$  Hz, 1H), 5.27 (dt,  $J = 10.5, 0.7$  Hz, 1H), 5.14-5.09 (m, 1H), 5.05 (ddd,  $J = 17.2, 1.5, 0.6$  Hz, 1H), 3.77 (q,  $J = 10.1$  Hz, 2H), 3.24-3.14 (m, 2H), 1.51 (s, 1H).  $^{13}\text{C-NMR}$  ( $\text{CDCl}_3$ , 101 MHz):  $\delta$  142.1, 140.0, 139.5, 135.2, 128.9, 128.4, 128.2, 127.7, 118.63, 118.53, 117.6, 110.2, 105.1, 59.4, 54.0, 52.0. **IR** (film): 3083, 3025, 2833, 1609,

1578, 1511, 1468, 1404, 1335, 1197, 1124, 1069, 988, 932, 898, 811, 743, 699, 594  $\text{cm}^{-1}$ .  $[\alpha]_D^{22}$ :  $-31.7$  ( $\text{CH}_2\text{Cl}_2$ ,  $c$  0.64). **HRMS** ( $\text{C}_{19}\text{H}_{20}\text{N}_3\text{O}_2$ ): calculated ( $M + H$ ): 322.3810, found ( $M + H$ ): 322.1550.

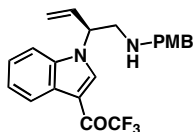

**(S)-2,2,2-trifluoro-1-(1-(1-((4-methoxybenzyl)amino)but-3-en-2-yl)-1H-indol-3-yl)ethanone (4h)**

Purified by silica gel flash chromatography. (30% ethyl acetate in petroleum ether) to provide 80 mg of a yellow oil (>99% yield, 81% ee by HPLC, AD column, 9:1 heptane/*i*-propanol, 1.0 mL/min, 254 nm,  $rt = 9.3, 11.6$  min.)  $R_f = 0.3$  (30% ethyl acetate/petroleum ether).  **$^1\text{H-NMR}$**  ( $\text{CDCl}_3$ , 400 MHz):  $\delta$  8.44-8.41 (m, 1H), 8.17 (q,  $J = 1.7$  Hz, 1H), 7.40-7.32 (m, 3H), 7.15-7.12 (m, 2H), 6.85-6.81 (m, 2H), 6.05 (ddd,  $J = 17.1, 10.5, 5.7$  Hz, 1H), 5.35 (dd,  $J = 10.6, 1.4$  Hz, 1H), 5.16-5.08 (m, 2H), 3.79 (s, 3H), 3.73 (s, 2H), 3.29-3.16 (m, 2H), 1.46 (s, 1H).  **$^{13}\text{C-NMR}$**  ( $\text{CDCl}_3$ , 101 MHz):  $\delta$  175.3, 159.3, 137.2, 136.6, 134.4, 131.9, 129.6, 127.4, 124.9, 124.5, 123.2, 119.6, 114.4, 111.3, 110.3, 63.8, 60.0, 55.7, 53.6, 51.6 **IR** (film): 3332, 3120, 2932, 2834, 1666, 1611, 1513, 1461, 1407, 1281, 1246, 1183, 1137, 1034, 877, 752  $\text{cm}^{-1}$ .  $[\alpha]_D^{22}$ :  $-17.9$  ( $\text{CH}_2\text{Cl}_2$ ,  $c$  1.01). **HRMS** ( $\text{C}_{22}\text{H}_{22}\text{N}_2\text{O}_2\text{F}_3$ ): calculated ( $M + H$ ): 403.1633, found ( $M + H$ ): 403.1628.

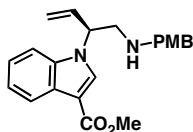

**(S)-methyl 1-(1-(4-methoxybenzylamino)but-3-en-2-yl)-1H-indole-3-carboxylate (4i)**

Purified by silica gel flash chromatography (35% ethyl acetate in petroleum ether) to provide 66.0 mg of a clear oil (91% yield, 93% ee by HPLC, IA column, 95:5 heptane/*i*-propanol, 0.8 mL/min, 254 nm,  $rt = 28.6, 32.8$  min.).  $R_f = 0.3$  (45% ethyl acetate/petroleum ether).  **$^1\text{H-NMR}$**  ( $\text{CDCl}_3$ , 400 MHz):  $\delta$  8.21-8.18 (m, 1H), 7.93 (s, 1H), 7.39-7.34 (m, 1H), 7.30-7.23 (m, 2H), 7.13-7.10 (m, 2H), 6.84-6.80 (m, 2H), 6.00 (ddd,  $J = 17.3, 10.6, 5.7$  Hz, 1H), 5.27-5.24 (m, 1H), 5.10-5.06 (m, 2H), 3.91 (s, 3H), 3.77 (s, 3H), 3.73-3.66 (m, 2H), 3.16 (qd,  $J = 14.2, 6.8$  Hz, 2H),

1.40 (s, 1H).  $^{13}\text{C-NMR}$  ( $\text{CDCl}_3$ , 101 MHz):  $\delta$  165.9, 159.2, 137.1, 135.2, 132.5, 132.1, 129.6, 127.0, 123.2, 122.5, 122.2, 118.7, 114.3, 110.8, 108.1, 59.2, 55.7, 53.7, 51.8, 51.5. **IR** (film) 2995, 2948, 2835, 1697, 1612, 1532, 1512, 1460  $\text{cm}^{-1}$ .  $[\alpha]_{\text{D}}$ :  $-19.4$  ( $\text{CH}_2\text{Cl}_2$ ,  $c$  1.03). **HRMS** ( $\text{C}_{22}\text{H}_{24}\text{N}_2\text{O}_3\text{Na}$ ): calculated ( $\text{M} + \text{Na}$ ): 387.1676, found ( $\text{M} + \text{Na}$ ): 387.1685.

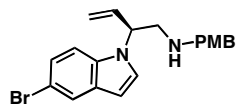

**(S)-2-(5-bromo-1H-indol-1-yl)-N-(4-methoxybenzyl)but-3-en-1-amine (4j)**

Purified by column chromatography (30% ethyl acetate/petroleum ether) to provide 44 mg of a clear oil (57% yield, 73 %ee by HPLC, OD-H column, 98:2 heptane/*i*-propanol, 0.8mL/min, 254 nm,  $r_t$  = 26.3, 30.0 min).  $R_f$  = 0.30 (35% ethyl acetate/petroleum ether).  $^1\text{H-NMR}$  ( $\text{CDCl}_3$ , 400 MHz):  $\delta$  7.74 (d,  $J$  = 1.8 Hz, 1H), 7.26-7.20 (m, 2H), 7.16 (d,  $J$  = 3.2 Hz, 1H), 7.11-7.09 (m, 2H), 6.83-6.80 (m, 2H), 6.48 (dd,  $J$  = 3.2, 0.4 Hz, 1H), 5.98 (ddd,  $J$  = 17.2, 10.5, 5.5 Hz, 1H), 5.20 (ddd,  $J$  = 10.5, 1.4, 0.8 Hz, 1H), 5.06-4.98 (m, 2H), 3.78 (s, 3H), 3.68 (q,  $J$  = 10.7 Hz, 2H), 3.12 (qd,  $J$  = 14.2, 7.0 Hz, 2H), 1.25 (s, 1H).  $^{13}\text{C-NMR}$  ( $\text{CDCl}_3$ , 101 MHz):  $\delta$  159.2, 135.8, 135.3, 132.2, 130.7, 129.67, 129.61, 126.86, 126.82, 124.8, 123.9, 118.0, 114.3, 113.3, 111.8, 102.1, 59.0, 55.7, 53.4, 52.0. **IR**(film): 3081, 2999, 2929, 2832, 1610, 1510, 1460, 1300, 1246, 1176, 1034 754, 719  $\text{cm}^{-1}$ .  $[\alpha]_{\text{D}}$ :  $-24.9$  ( $\text{CH}_2\text{Cl}_2$ ,  $c$  1.14). **HRMS** ( $\text{C}_{20}\text{H}_{22}\text{N}_2\text{O}_1\text{Br}$ ): calculated ( $\text{M} + \text{H}$ ): 385.0837, found ( $\text{M} + \text{H}$ ): 385.0910.

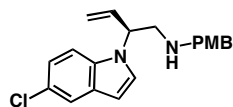

**(S)-2-(5-chloro-1H-indol-1-yl)-N-(4-methoxybenzyl)but-3-en-1-amine (4k)**

Purified by column chromatography (30% ethyl acetate/petroleum ether) to provide 37.2 mg of a clear oil (60% yield, 73 %ee by HPLC, OD-H column, 98:2 heptane/*i*-propanol, 0.8mL/min, 254 nm,  $r_t$  = 25.0, 29.2 min).  $R_f$  = 0.30 (35% ethyl acetate/petroleum ether).  $^1\text{H-NMR}$  ( $\text{CDCl}_3$ , 400 MHz):  $\delta$  7.59-7.58 (m, 1H), 7.26 (s, ), 7.24 (d,  $J$  = 1.2 Hz, 1H), 7.18 (d,  $J$  = 3.2 Hz, 1H), 7.13 (d,  $J$  = 2.0 Hz, 1H), 7.12-7.09 (m, 2H), 6.83-6.80 (m, 2H), 6.48 (dd,  $J$  = 3.2, 0.7 Hz, 1H), 5.99 (ddd,  $J$  = 17.2, 10.5, 5.5 Hz, 1H), 5.20 (ddd,  $J$  = 10.5, 1.4, 0.8 Hz, 1H), 5.05-4.99 (m, 2H), 3.78 (s, 3H), 3.68 (q,  $J$  = 10.9 Hz, 2H), 3.13 (qd,  $J$  = 14.4, 7.0 Hz, 2H), 1.32 (s, 1H).  $^{13}\text{C-NMR}$  ( $\text{CDCl}_3$ ,

101 MHz):  $\delta$  159.2, 135.9, 135.0, 132.2, 130.0, 129.6, 126.9, 125.7, 122.3, 120.8, 117.9, 114.3, 111.3, 102.2, 59.0, 55.7, 53.4, 52.0. **IR** (film): 3341, 3000, 2929, 2832, 1610, 1511, 1460, 1300, 1246, 1197, 1176, 1064, 1034, 818, 793, 754, 720  $\text{cm}^{-1}$ .  $[\alpha]_D$ :  $-28.3$  ( $\text{CH}_2\text{Cl}_2$ ,  $c$  1.02). **HRMS** ( $\text{C}_{20}\text{H}_{22}\text{N}_2\text{O}_1\text{Cl}$ ): calculated ( $M + H$ ): 341.1342, found ( $M + H$ ): 341.1415.

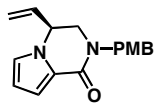

**(S)-2-(4-methoxybenzyl)-4-vinyl-3,4-dihydropyrrolo[1,2-a]pyrazin-1(2H)-one (5a)**

Purified by column chromatography (30% ethyl acetate/petroleum ether) to provide 55 mg of a clear oil (97% yield, 90 %ee by HPLC, AD column, 9:1 heptane/*i*-propanol, 0.8mL/min, 254 nm,  $rt = 39.2, 48.1$  min).  $R_f = 0.30$  (30% ethyl acetate/petroleum ether).  **$^1\text{H-NMR}$**  ( $\text{CDCl}_3$ , 500 MHz):  $\delta$  7.25-7.22 (m, 2H), 7.01 (dd,  $J = 3.8, 1.6$  Hz, 1H), 6.86-6.83 (m, 2H), 6.71 (dd,  $J = 2.5, 1.6$  Hz, 1H), 6.24 (dd,  $J = 3.8, 2.6$  Hz, 1H), 5.76 (ddd,  $J = 17.0, 10.2, 6.9$  Hz, 1H), 5.33 (dt,  $J = 10.2, 0.8$  Hz, 1H), 5.11 (dt,  $J = 17.0, 1.0$  Hz, 1H), 4.72-4.60 (m, 4H), 3.79 (s, 3H), 3.46 (ddd,  $J = 67.4, 12.7, 6.0$  Hz, 2H).  **$^{13}\text{C-NMR}$**  ( $\text{CDCl}_3$ , 126 MHz):  $\delta$  159.6, 134.1, 130.1, 129.4, 124.8, 122.4, 121.2, 114.4, 110.4, 57.1, 55.7, 50.3, 48.9. **IR**(film): 3468, 2927, 1641, 1545, 1512, 1475, 1462  $\text{cm}^{-1}$ .  $[\alpha]_D$ :  $-1.7$  ( $\text{CH}_2\text{Cl}_2$ ,  $c$  1.10). **HRMS** ( $\text{C}_{17}\text{H}_{18}\text{N}_2\text{O}_2\text{Na}$ ): calculated ( $M + \text{Na}$ ): 305.1266, found ( $M + \text{Na}$ ): 305.1252.

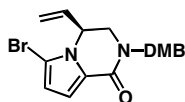

**(S)-6-bromo-2-(2,4-dimethoxybenzyl)-4-vinyl-3,4-dihydro-2H-pyrrolo[1,2a]pyrazin-1-one (5b)**

A solution of  $[\text{Pd}(\text{C}_3\text{H}_5)\text{Cl}]_2$  (0.92 mg, 0.0025 mmol) and (*R,R*)-**L1** (5.2 mg, 0.0075 mmol) in 0.5 ml degassed  $\text{CH}_2\text{Cl}_2$  which had been stirring at  $rt$  for 10 min, was added to a solution of compound methyl 5-bromo-1*H*-pyrrole-2-carboxylate (20.4 mg, 0.1 mmol) and vinyl aziridine **1c** (22 mg, 0.1 mmol) in  $\text{CH}_2\text{Cl}_2$  (0.5 ml) under Ar. The mixture was stirred at  $rt$  for 16 hr, and then the solvent was removed under vacuum. Compound **5b** with some uncyclized product were isolated via silica gel flash column chromatography (petroleum ether / ethyl acetate = 4/1, then 3/2) as a light yellow oil. After two days at  $rt$  under vacuum, the uncyclized intermediate was

automatically converted to the cyclized compound as a light yellow foam. (28 mg, 72%, 95% ee by HPLC OD column, 90:10 heptane/*i*-propanol, 0.8 ml/min):  $R_f$ : 0.35 (petroleum ether / ethyl acetate = 3/2);  $[\alpha]_D$ : -21.12 (CH<sub>2</sub>Cl<sub>2</sub>, c 0.1); <sup>1</sup>H NMR (CDCl<sub>3</sub>, 500 MHz) δ 7.25 (m, 1H), 6.95 (d,  $J$  = 4.0 Hz, 1H), 6.43 (m, 2H), 6.26 (d,  $J$  = 4.0 Hz, 1H), 5.64 (ddd,  $J$  = 17, 10.5, 5.0 Hz, 1H), 5.10 (dd,  $J$  = 10.5, 1.5 Hz, 1H), 4.75 (m, 2H), 4.60 (d,  $J$  = 17 Hz, 1H), 4.50 (d,  $J$  = 14.5 Hz, 1H), 3.88 (dd,  $J$  = 13, 4.5 Hz, 1H), 3.79 (s, 6H), 3.48 (dd,  $J$  = 13, 1.5 Hz, 1H); <sup>13</sup>C-NMR (CDCl<sub>3</sub>, 125 MHz) δ 160.5, 158.7, 158.5, 133.8, 131.7, 125.6, 118.0, 117.2, 114.1, 112.4, 104.7, 104.2, 98.3, 55.5, 55.4, 54.6, 49.5, 43.7; IR (film) 2936, 1645, 1614, 1418, 1209 cm<sup>-1</sup>; HRMS (C<sub>18</sub>H<sub>19</sub>BrN<sub>2</sub>O<sub>3</sub>): Calc'd. 392.055858 (M<sup>+</sup>), Found 392.056840.

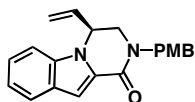

**(S)-methyl 1-(1-(4-methoxybenzylamino)but-3-en-2-yl)-1H-indole-2-carboxylate (5c)**

Purified by silica gel flash chromatography (25% ethyl acetate in petroleum ether) to provide 44 mg of a yellow oil (66% yield, 93% ee by HPLC, IA column, 9:1 heptane/*i*-propanol, 1.0 mL/min, 254 nm, rt = 42.7, 52.7 min.)  $R_f$  = 0.3 (25% ethyl acetate/petroleum ether). <sup>1</sup>H-NMR (CDCl<sub>3</sub>, 500 MHz): δ 7.72 (dt,  $J$  = 8.1, 0.9 Hz, 1H), 7.34 (d,  $J$  = 0.7 Hz, 1H), 7.29 (ddd,  $J$  = 8.2, 6.9, 1.2 Hz, 1H), 7.25-7.23 (m, 2H), 7.15 (ddd,  $J$  = 8.0, 6.8, 1.2 Hz, 1H), 6.87-6.84 (m, 2H), 5.72 (ddd,  $J$  = 17.0, 10.3, 5.3 Hz, 1H), 5.08 (dd,  $J$  = 10.3, 0.9 Hz, 1H), 4.96 (ddt,  $J$  = 4.8, 3.2, 1.7 Hz, 1H), 4.89 (d,  $J$  = 14.6 Hz, 1H), 4.61 (ddd,  $J$  = 17.0, 1.5, 0.5 Hz, 1H), 4.54 (d,  $J$  = 14.6 Hz, 1H), 3.91 (dd,  $J$  = 12.8, 4.7 Hz, 1H), 3.79 (s, 3H), 3.44 (dd,  $J$  = 12.8, 2.2 Hz, 1H). <sup>13</sup>C-NMR (CDCl<sub>3</sub>, 126 MHz): δ 160.3, 159.6, 136.6, 134.3, 130.3, 129.2, 128.8, 127.9, 125.0, 123.2, 121.2, 118.5, 114.4, 110.5, 107.0, 55.7, 53.4, 50.0, 49.3. IR (film): 1647, 1548, 1512, 1452, 1432, 1355, 1246 cm<sup>-1</sup>.  $[\alpha]_D$ : -1.8 (CH<sub>2</sub>Cl<sub>2</sub>, c 1.00). HRMS (C<sub>21</sub>H<sub>20</sub>N<sub>2</sub>O<sub>2</sub>Na): calculated (M + Na): 355.1422, found (M + Na): 355.1422.

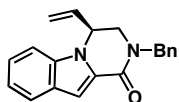

**(S)-2-benzyl-4-vinyl-3,4-dihydropyrazino[1,2-a]indol-1(2H)-one (5d)**

Purified by silica gel flash chromatography. (25% ethyl acetate in petroleum ether) to provide 1.17 g of an orange oil (97% yield, 95% ee by HPLC, OD column, 8:2 heptane/*i*-propanol, 0.8 mL/min, 254 nm, rt = 21.6, 32.6 min.)  $R_f = 0.3$  (25% ethyl acetate/petroleum ether).  **$^1\text{H-NMR}$**  ( $\text{CDCl}_3$ , 400 MHz):  $\delta$  7.73 (dt,  $J = 8.1, 0.9$  Hz, 1H), 7.36 (d,  $J = 0.7$  Hz, 1H), 7.34-7.24 (m, 6H), 7.16 (ddd,  $J = 8.0, 6.7, 1.3$  Hz, 1H), 5.74 (ddd,  $J = 17.0, 10.3, 5.3$  Hz, 1H), 5.09 (dd,  $J = 10.3, 0.9$  Hz, 1H), 4.99-4.93 (m, 2H), 4.65-4.60 (m, 2H), 3.95 (dd,  $J = 12.8, 4.7$  Hz, 1H), 3.45 (dd,  $J = 12.8, 2.2$  Hz, 1H).  **$^{13}\text{C-NMR}$**  ( $\text{CDCl}_3$ , 101 MHz):  $\delta$  160.4, 136.84, 136.65, 134.3, 129.12, 129.00, 128.2, 127.9, 125.1, 123.2, 121.3, 118.6, 110.5, 107.2, 53.4, 50.3, 50.0. **IR** (film): 3057, 3028, 2917, 1647, 1548, 1451, 1426, 1355, 1317, 1244, 744  $\text{cm}^{-1}$ .  $[\alpha]_D^{22}$ : 6.82 ( $\text{CH}_2\text{Cl}_2$ , c 1.66). **HRMS** ( $\text{C}_{20}\text{H}_{19}\text{N}_2\text{O}_1$ ): calculated (M + H): 303.1497, found (M + H): 303.1490.

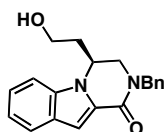

**(S)-2-benzyl-4-(2-hydroxyethyl)-3,4-dihydropyrazino[1,2-a]indol-1(2H)-one (6)**

To a solution of olefin **5d** (91 mg, 0.3 mmol) in THF (3 mL, 0.1M) is added solid, freshly prepared dicyclohexylborane (160 mg, 0.9 mmol). The reaction is stirred overnight and a solution of NaOH (1 mL, 1M) is added followed by a solution of  $\text{H}_2\text{O}_2$  (1 mL, 30%). The reaction mixture is stirred at rt for 1h and extracted into ethyl acetate (3x 30 mL). The combined organic extracts are dried over magnesium sulfate and concentrated *en vacuo*. The crude reaction mixture is purified using column chromatography (50% ethyl acetate/petroleum ether) to provide the desired product as a white foam (82 mg, 85%).  **$^1\text{H-NMR}$**  ( $\text{CDCl}_3$ , 400 MHz):  $\delta$  7.68-7.66 (m, 1H), 7.43 (dd,  $J = 8.4, 0.8$  Hz, 1H), 7.31-7.21 (m, 7H), 7.11 (ddd,  $J = 8.0, 7.0, 0.9$  Hz, 1H), 5.05 (d,  $J = 14.4$  Hz, 1H), 4.74 (q,  $J = 5.4$  Hz, 1H), 4.43 (d,  $J = 14.5$  Hz, 1H), 3.86 (dd,  $J = 12.9, 4.2$  Hz, 1H), 3.46 (dd,  $J = 12.9, 1.2$  Hz, 1H), 3.34 (dtt,  $J = 11.6, 7.6, 4.0$  Hz, 2H), 2.63-2.59 (m, 1H), 1.82 (dtd,  $J = 14.0, 6.8, 4.5$  Hz, 1H), 1.70-1.63 (m, 1H).  **$^{13}\text{C-NMR}$**  ( $\text{CDCl}_3$ , 101 MHz):  $\delta$  160.5, 136.9, 136.5, 129.16, 129.13, 128.34, 128.30, 127.6, 125.0, 123.0, 121.1, 110.4, 107.0, 58.9, 49.9, 49.0, 48.0, 35.5. **IR** (film): 3384, 2919, 1629, 1547, 1449, 1430, 1356, 1319, 1250, 1139, 1057, 743, 700  $\text{cm}^{-1}$ .  $[\alpha]_D^{22}$ : - 25.0 ( $\text{CH}_2\text{Cl}_2$ , c 1.00). **HRMS** ( $\text{C}_{20}\text{H}_{21}\text{N}_2\text{O}_2$ ): calculated (M + H): 321.1603, found (M + H): 321.1598.

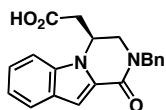

**(S)-2-(2-benzyl-1-oxo-1,2,3,4-tetrahydropyrazino[1,2-a]indol-4-yl)acetic acid (7)**

To a solution of alcohol **6** (32 mg, 0.1 mmol) in dichloromethane (0.5 mL, 0.2M) is added sodium bicarbonate (34 mg, 0.4 mmol), iodobenzene diacetate (81 mg, 0.25 mmol), and TEMPO (2 mg, 0.01 mmol). The reaction mixture is stirred at rt for 10h, and poured onto a concentrated solution of Na<sub>2</sub>S<sub>2</sub>O<sub>3</sub> (50 mL). The biphasic mixture is stirred for 0.5h and extracted into ethyl acetate (3x 30 mL). The combined organic extracts are treated with 1M NaOH until a pH of 11-13 is achieved. The desired carboxylate is extracted into the aqueous layer with sodium hydroxide (3x 30 mL 1M). The combined aqueous extracts are treated with 1M HCl until a pH of 1-3 is achieved. The desired acid is extracted from into ethyl acetate (3x 30mL). The combined organic layers are dried over magnesium sulfate and concentrated *en vacuo* to afford the desired product as a white foam (27 mg, 81%). <sup>1</sup>H-NMR (CDCl<sub>3</sub>, 500 MHz): δ 7.72 (d, *J* = 8.1 Hz, 1H), 7.35-7.32 (m, 7H), 7.30-7.27 (m, 1H), 7.19-7.16 (m, 1H), 5.06 (d, *J* = 14.5 Hz, 1H), 4.92-4.89 (m, 1H), 4.54 (d, *J* = 14.5 Hz, 1H), 3.98 (dd, *J* = 13.2, 3.6 Hz, 1H), 3.65-3.62 (m, 1H), 2.67-2.54 (m, 2H). <sup>13</sup>C-NMR (CDCl<sub>3</sub>, 126 MHz): δ 177.6, 160.3, 136.4, 135.5, 129.2, 129.0, 128.3, 127.97, 127.93, 125.3, 123.3, 121.4, 109.8, 107.9, 50.0, 48.6, 47.2, 35.8, 30.0. IR (film): 3057, 2916, 2848, 1724, 1616, 1548, 1468, 1451, 1432, 1356, 1320, 1250, 1225, 1168, 1140, 743, 701. [α]<sub>D</sub><sup>22</sup>: -22.6 (CHCl<sub>3</sub>, c 1.01).

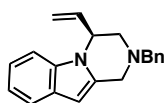

**(S)-2-benzyl-4-vinyl-1,2,3,4-tetrahydropyrazino[1,2-a]indole (8)**

To a solution of olefin **5d** (302 mg, 1.0 mmol) in THF (10 mL, 0.1M) at 0 °C is added LiAlH<sub>4</sub> (76 mg, 2.0 mmol). The reaction mixture is stirred for 4h while allowing to warm to rt. The reaction is cooled back down to 0 °C, and sodium sulfate decahydrate (500 mg) is added portion-wise to destroy unreacted hydride. After several hours, the reaction mixture is filtered through celite and concentrated *en vacuo*. The crude reaction mixture is purified using column chromatography (10% ethyl ether/petroleum ether) to provide the desired product as a yellow oil

(206 mg, 72%)  $R_f = 0.5$  (10% diethyl ether/petroleum ether).  $^1\text{H-NMR}$  ( $\text{CDCl}_3$ , 400 MHz):  $\delta$  7.54-7.52 (m, 1H), 7.39-7.27 (m, 6H), 7.11-7.05 (m, 2H), 6.18 (q,  $J = 1.0$  Hz, 1H), 6.02 (ddd,  $J = 17.2, 10.2, 7.4$  Hz, 1H), 5.24-5.17 (m, 2H), 4.82-4.79 (m, 1H), 3.98-3.95 (m, 1H), 3.75-3.64 (m, 3H), 2.93 (qdd,  $J = 11.9, 4.7, 0.9$  Hz, 2H).  $^{13}\text{C-NMR}$  ( $\text{CDCl}_3$ , 126 MHz):  $\delta$  138.2, 137.9, 136.3, 134.8, 129.4, 129.05, 128.89, 127.8, 120.9, 120.5, 120.2, 117.5, 111.0, 97.2, 62.5, 57.1, 56.6, 52.1.  $[\alpha]_D^{22}$ : 20.6 ( $\text{CH}_2\text{Cl}_2$ , c 1.78). **IR (film)**: 3557, 3025, 2799, 2751, 1456, 1216, 1361, 1331, 746, 698  $\text{cm}^{-1}$ .

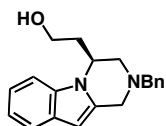

**(S)-2-(2-benzyl-1,2,3,4-tetrahydropyrazino[1,2-a]indol-4-yl)ethanol (9)**

To a solution of olefin **8** (100 mg, 0.33 mmol) in THF (3.5 mL, 0.1M) at rt is added solid, freshly prepared dicyclohexylborane (178 mg, 1.0 mmol). The reaction is stirred overnight and a solution of NaOH (1 mL, 1M) followed by a solution of  $\text{H}_2\text{O}_2$  (1 mL, 30%). The reaction mixture is stirred at rt for 1h and extracted into ethyl acetate (3x 30 mL). The combined organic extracts are dried over magnesium sulfate and concentrated *en vacuo*. The crude reaction mixture is purified using column chromatography (40% ethyl acetate/petroleum ether) to provide the desired product as a yellow oil (99 mg, 93%).  $R_f = 0.3$  (30% ethyl acetate/petroleum ether).  $^1\text{H-NMR}$  ( $\text{CDCl}_3$ , 400 MHz):  $\delta$  7.53 (d,  $J = 7.4$  Hz, 1H), 7.41-7.32 (m, 5H), 7.25-7.22 (m, 1H), 7.15-7.06 (m, 2H), 6.31 (s, 1H), 6.14 (s, 1H), 4.75 (d,  $J = 1.1$  Hz, 1H), 4.12 (dd,  $J = 14.6, 1.4$  Hz, 1H), 3.88 (d,  $J = 12.4$  Hz, 1H), 3.58 (d,  $J = 12.4$  Hz, 1H), 3.38 (dd,  $J = 14.5, 1.3$  Hz, 1H), 3.27-3.18 (m, 2H), 2.85 (dd,  $J = 12.0, 4.6$  Hz, 1H), 2.57-2.48 (m, 2H), 1.90 (dddd,  $J = 14.8, 11.4, 3.3, 1.4$  Hz, 1H).  $^{13}\text{C-NMR}$  ( $\text{CDCl}_3$ , 101 MHz):  $\delta$  135.8, 135.1, 133.9, 130.1, 129.20, 129.07, 128.5, 121.2, 120.9, 120.4, 110.2, 97.4, 63.5, 56.7, 56.3, 51.14, 50.98, 36.9. **IR (film)**: 3377, 3055, 2923, 1456, 1421, 1360, 1332, 1059, 748, 699  $\text{cm}^{-1}$ .  $[\alpha]_D^{22}$ : 90.9 ( $\text{CH}_2\text{Cl}_2$ , c 1.20).

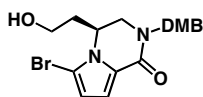

**(S)-6-bromo-2-(2,4-dimethoxybenzyl)-4-(2-hydroxyethyl)-3,4-dihydro-2H-pyrrolo[1,2-a]pyrazin-1-one (10)**



9-BBN (99 mg, 0.40 mmol) was added to a solution of **5b** (105 mg, 0.27 mmol) in THF (2 ml) at 0 °C under N<sub>2</sub>. The resulting solution was stirred at rt for 3 h, before it was quenched with NaBO<sub>3</sub>·H<sub>2</sub>O (81mg, 0.81 mmol) and H<sub>2</sub>O (1 ml). The mixture was stirred at rt for 12h before it was extracted with ethyl acetate (20 ml x 3). The combined organic fraction was dried over MgSO<sub>4</sub>. Compound **2.21** was purified via silica gel flash column chromatography (5% MeOH in CH<sub>2</sub>Cl<sub>2</sub>) to give a white foam (90 mg, with 7.7 mg starting material recovered, 82%, brsm 88%): **R<sub>f</sub>**: 0.40 (10% MeOH in CH<sub>2</sub>Cl<sub>2</sub>); [α]<sub>D</sub>: -31.64 (c 0.35, CH<sub>2</sub>Cl<sub>2</sub>); **<sup>1</sup>H NMR** (CDCl<sub>3</sub>, 500 MHz): δ 7.28 (m, 1H), 6.92 (d, *J* = 4.0 Hz, 1H), 6.45 (m, 2H), 6.23 (d, *J* = 4.0 Hz, 1H), 5.00 (d, *J* = 14.5 Hz, 1H), 4.42 (m, 1H), 4.35 (d, *J* = 14 Hz, 1H), 3.81 (s, 3H), 3.81 (s, 3H), 3.77 (m, 1H), 3.56 (dd, *J* = 13, 1.5 Hz, 1H), 3.47 (m, 1H), 3.33 (m, 1H), 1.72 (m, 2H); **<sup>13</sup>C-NMR** (CDCl<sub>3</sub>, 126 MHz) δ 160.7, 158.8, 158.4, 132.3, 125.2, 117.4, 114.2, 112.3, 104.4, 103.7, 98.5, 59.1, 55.5, 50.2, 47.6, 43.2, 35.0, 30.4; **IR** (film) 3383 (br), 2923, 2851, 1660, 1615, 1417, 1209 cm<sup>-1</sup>; **HRMS** (C<sub>18</sub>H<sub>21</sub>BrN<sub>2</sub>O<sub>4</sub>): Calc'd. 410.066422 (M<sup>+</sup>), Found 410.068069.

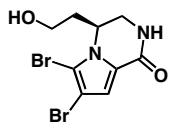

**(S)-6,7-Dibromo-4-(2-hydroxy-ethyl)-3,4-dihydro-2H-pyrrolo[1,2-a]pyrazin-1-one (11)**

TFA (0.6 ml) was added to a solution of **10** (58 mg, 0.14 mmol), tetrahydrothiophene (59.4 mg, 0.68 mmol) in CH<sub>2</sub>Cl<sub>2</sub> (0.6 ml) at rt. The resulting brown solution was stirred at 50 °C for 20 hr, before poured into pre-cooled sat. NaHCO<sub>3</sub> solution. The mixture was extracted with ethyl acetate (20 ml x 3), and the combined organic fraction was dried over Na<sub>2</sub>SO<sub>4</sub>. The products, as a ca. 2:1 mixture (mono-bromo-product and debromo-product) were purified via silica gel flash column chromatography (10% MeOH/CH<sub>2</sub>Cl<sub>2</sub>). The mixture was then dissolved with THF (1 ml) and MeOH (0.5 ml). At 0 °C, NBS (37 mg, 0.21 mmol) was added portionwisely to the above solution. The resulting solution was stirred at rt for 0.5 hr before the solvents were removed under vacuum. Compound **11** was purified via silica gel flash column chromatography (5% MeOH in CH<sub>2</sub>Cl<sub>2</sub>) to give a white foam (46.1 mg, 96% over two steps): **R<sub>f</sub>**: 0.50 (10% MeOH in ethyl acetate); [α]<sub>D</sub>: -27.3 (c 0.6, MeOH); **<sup>1</sup>H NMR** (CD<sub>3</sub>OD, 400 MHz): δ 6.92 (s, 1H), 4.60 (m, 1H), 3.80 (dd, *J* = 13.6, 4.0 Hz, 1H), 3.69-3.64 (m, 3H), 2.00 (m, 1H), 1.85 (m, 1H); **<sup>13</sup>C-NMR** (CD<sub>3</sub>OD, 101 MHz) δ 161.1, 126.1, 116.4, 108.1, 101.3, 59.3, 53.3, 43.4, 35.5; **IR** (film)

3308 (br), 2927, 2882, 1652, 1550, 1465, 1429, 1338  $\text{cm}^{-1}$ ; **HRMS** ( $\text{C}_9\text{H}_{10}\text{Br}_2\text{N}_2\text{O}_2$ ): Calc'd. 335.910900 ( $\text{M}^+$ ), Found 335.910485.

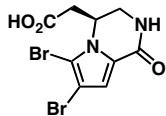

**Longamide B: (S)-2-(6,7-dibromo-1-oxo-1,2,3,4-tetrahydropyrrolo[1,2-a]pyrazin-4-yl)acetic acid (12)**

TEMPO (0.44 mg, 0.0028 mmol) was added to a mixture of compound **11** (9.5 mg, 0.028 mmol),  $\text{PhI}(\text{OAc})_2$  (22.7 mg, 0.0705 mmol) and  $\text{NaHCO}_3$  (9.4 mg, 0.112 mmol) in  $\text{CH}_2\text{Cl}_2$  (0.15 ml) at rt under air. The resulting solution was stirred at rt for 3 hr, before quenched with sat.  $\text{Na}_2\text{S}_2\text{O}_3$  and sat.  $\text{NaHCO}_3$ . The mixture was diluted with ethyl acetate, and longamide B (**12**) was further purified via a classical acid-base treatment as a white powder (9.3 mg, 95%). **mp** 203-204  $^\circ\text{C}$  (decomposed to black tar);  $[\alpha]_D^{25}$ :  $-8.21$  (c 0.52, MeOH);  $^1\text{H NMR}$  ( $\text{CD}_3\text{OD}$ , 500 MHz):  $\delta$  6.94 (s, 1H), 4.81 (m, 1H), 3.89 (ddd,  $J = 13.5, 4.5, 1.5$  Hz, 1H), 3.66 (dd,  $J = 13.5, 1.5$  Hz, 1H), 2.86 (dd,  $J = 16.5, 11$  Hz, 1H), 2.55 (ddd,  $J = 16.5, 3.5, 1.5$  Hz, 1H); IR: 3282, 3203, 2924, 1715, 1645, 1558, 1428  $\text{cm}^{-1}$ ; **HRMS** ( $\text{C}_9\text{H}_8\text{Br}_2\text{N}_2\text{O}_3$ ): Calc'd. 349.890164 ( $\text{M}^+$ ), Found 349.889306.

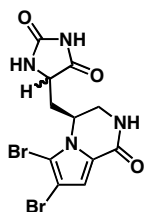

**Agesamides A and B: (4S)-6,7-dibromo-4-((2-imino-5-oxoimidazolidin-4-yl)methyl)-3,4-dihydropyrrolo[1,2-a]pyrazin-1(2H)-one (15 and 16)**

Dess–Martin periodane (34.3 mg, 0.081 mmol) was added to a mixture of compound **11** (16.5 mg, 0.040 mmol),  $\text{NaHCO}_3$  (10.1 mg, 0.12 mmol) in  $\text{CH}_2\text{Cl}_2$  (0.4 ml) at 0  $^\circ\text{C}$ . The resulting suspension was stirred at rt for 0.5 hr, before quenched with sat.  $\text{Na}_2\text{S}_2\text{O}_3$  and sat.  $\text{NaHCO}_3$ . The mixture was extracted with ethyl acetate (10 ml x 3), and the combined organic fraction was dried over  $\text{Na}_2\text{SO}_4$ . The solvent was removed, and the resultant aldehyde with  $(\text{NH}_4)_2\text{CO}_3$  (8.8 mg, 0.1125 mmol) and KCN (3.0 mg, 0.045 mmol) was then dissolved in EtOH/ $\text{H}_2\text{O}$  (1:1, 0.4 ml). The resulting solution was stirred vigorously at 60  $^\circ\text{C}$  overnight. The solvents were

removed under vacuum, and agesamides A and B (**15** and **16**) was purified via preparative silica gel TLC (10% MeOH in ethyl acetate) as a white solid (1:1 mixture, 17.5 mg, 100 % over two steps): **R<sub>f</sub>**: 0.35 (10% MeOH in ethyl acetate); **<sup>1</sup>H NMR** (DMSO-*d*<sub>6</sub>, 400 MHz): δ 10.80 (br, 1H), 8.18 (s, 1H), 8.04 (s, 1H), 7.89-7.88 (2H), 6.85 (s, 2H), 4.65 (m, 1H), 4.53 (d, *J* = 11.2 Hz, 1H), 4.20 (ddd, *J* = 11, 3.0, 1.5 Hz, 1H), 4.13 (m, 1H), 3.78-3.70 (2H), 3.54-3.46 (2H), 2.12 (ddd, *J* = 14, 11.5, 3.5 Hz, 1H), 2.04 (ddd, *J* = 14.0, 9.0, 7.0 Hz, 1H), 1.79 (m, 1H), 1.53 (m, 1H); **<sup>13</sup>C-NMR** (DMSO-*d*<sub>6</sub>, 101 MHz) δ 175.2, 174.9, 157.53, 157.46, 157.2, 157.1, 125.5, 114.0, 113.9, 105.71, 105.67, 99.3, 54.6, 54.3, 50.6, 41.7, 40.2, 33.8, 33.5; **IR**: 3228 (br), 2926, 2854, 1724, 1646, 1550, 1429, 1338 cm<sup>-1</sup>; **HRMS** (C<sub>11</sub>H<sub>10</sub>Br<sub>2</sub>N<sub>4</sub>O<sub>3</sub>): Calc'd. 403.911963 (M<sup>+</sup>), Found 403.910347.

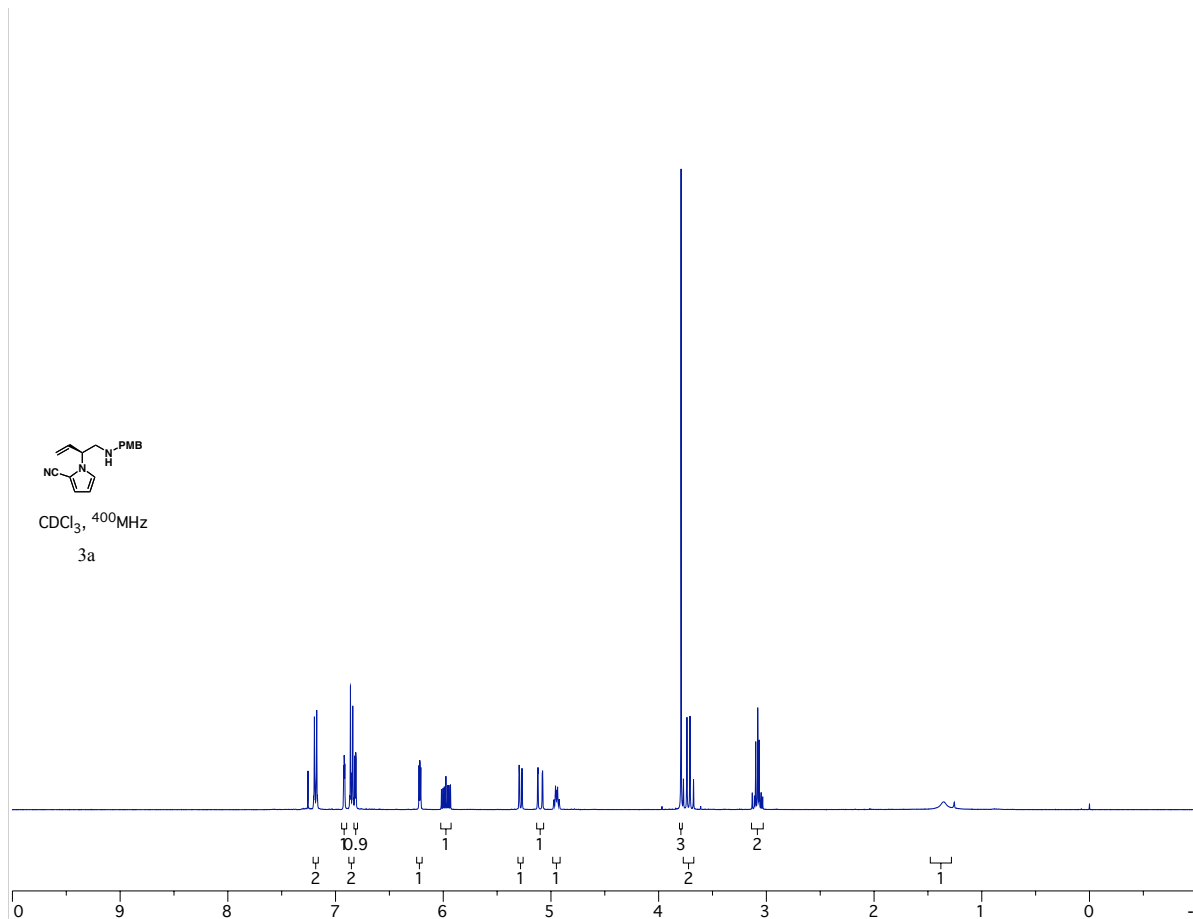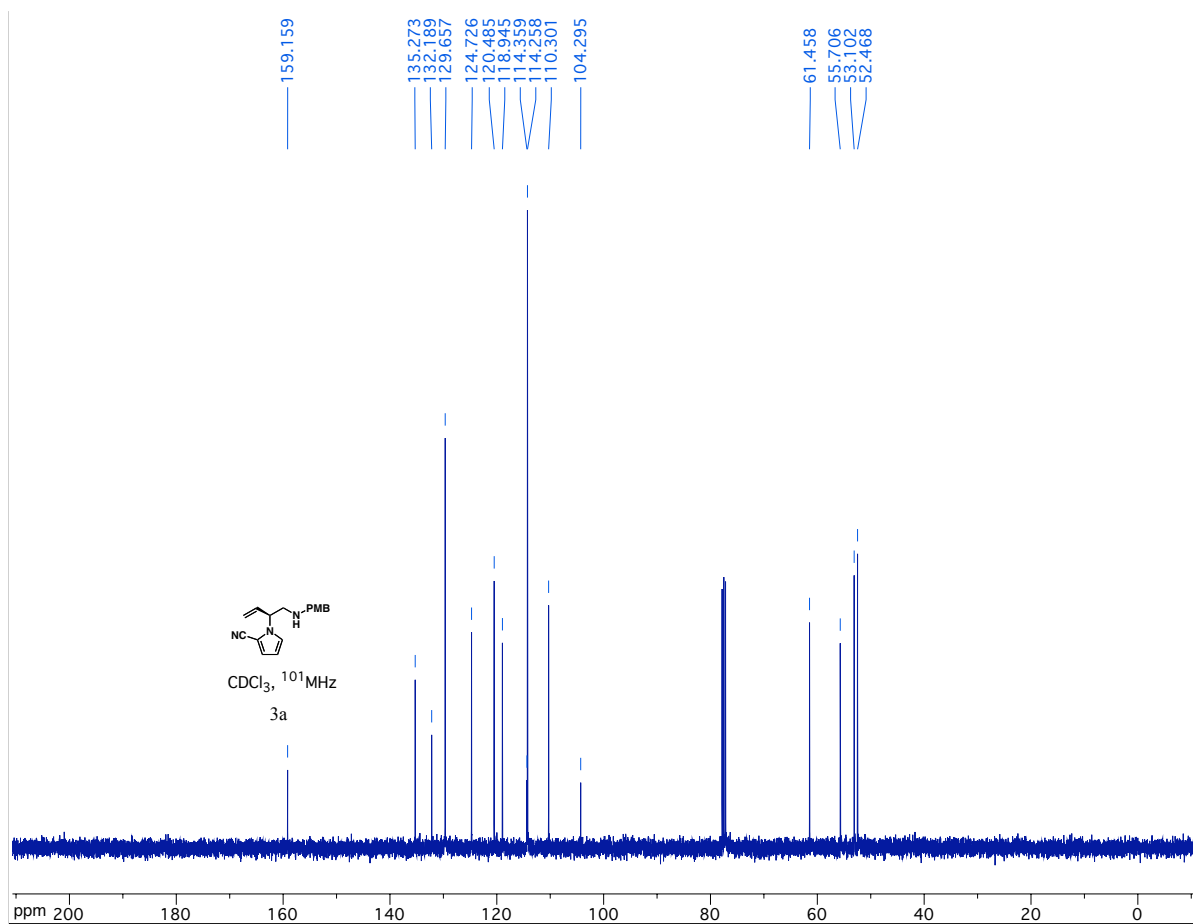

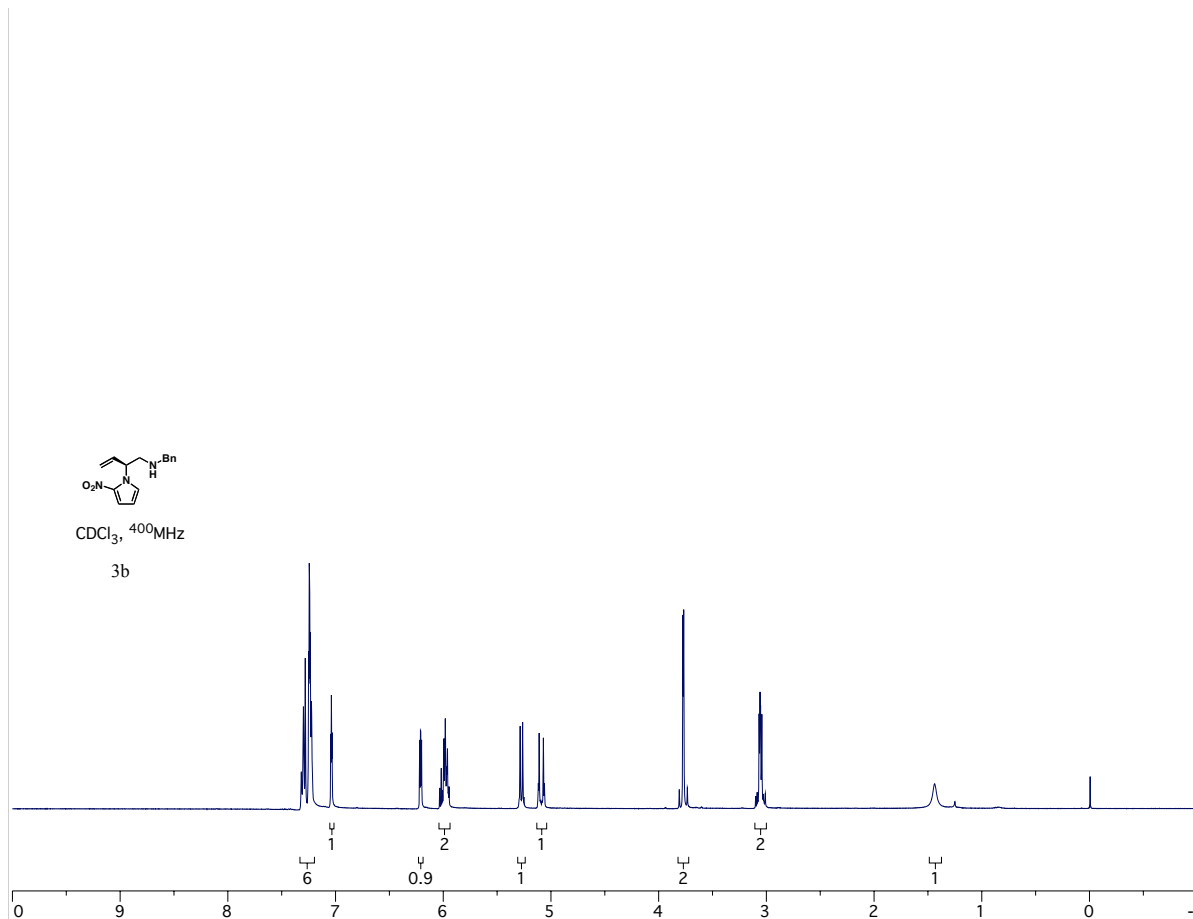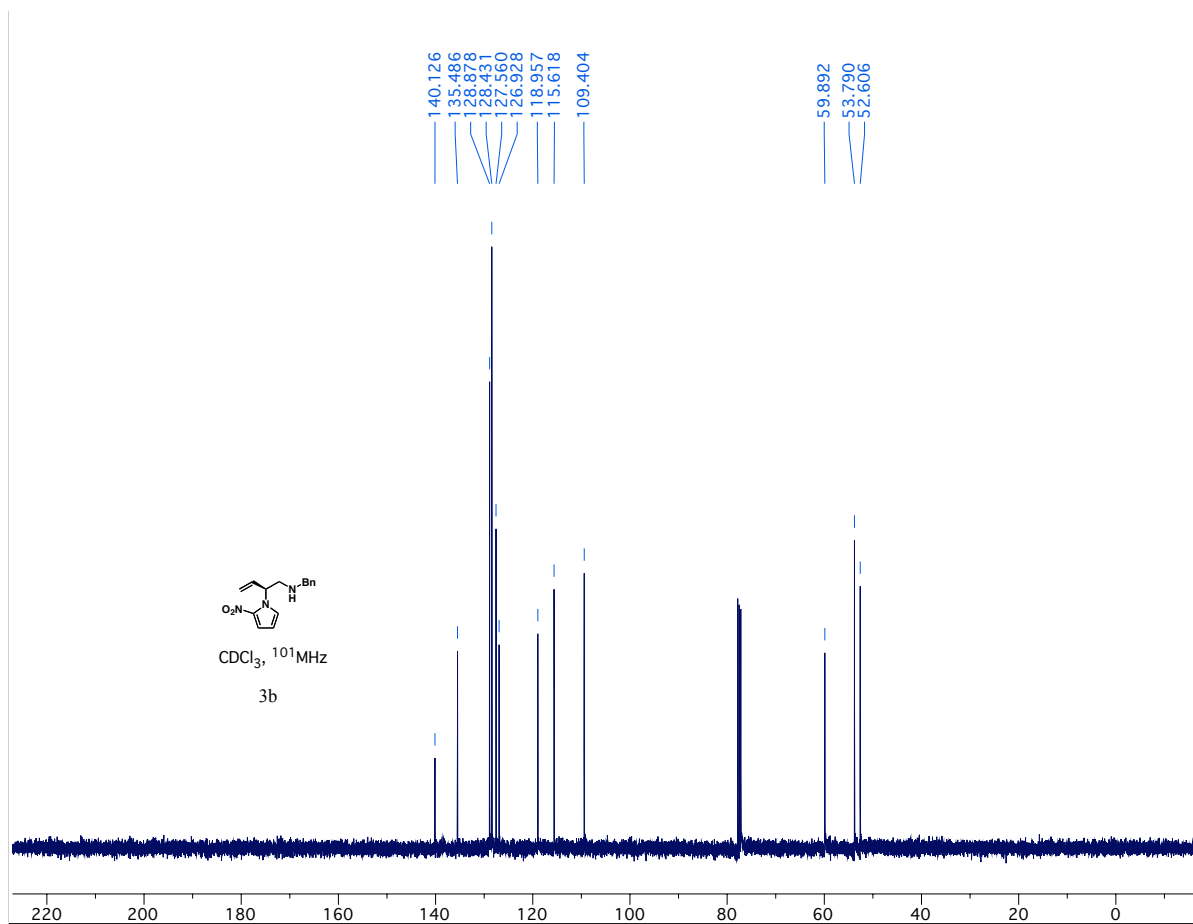

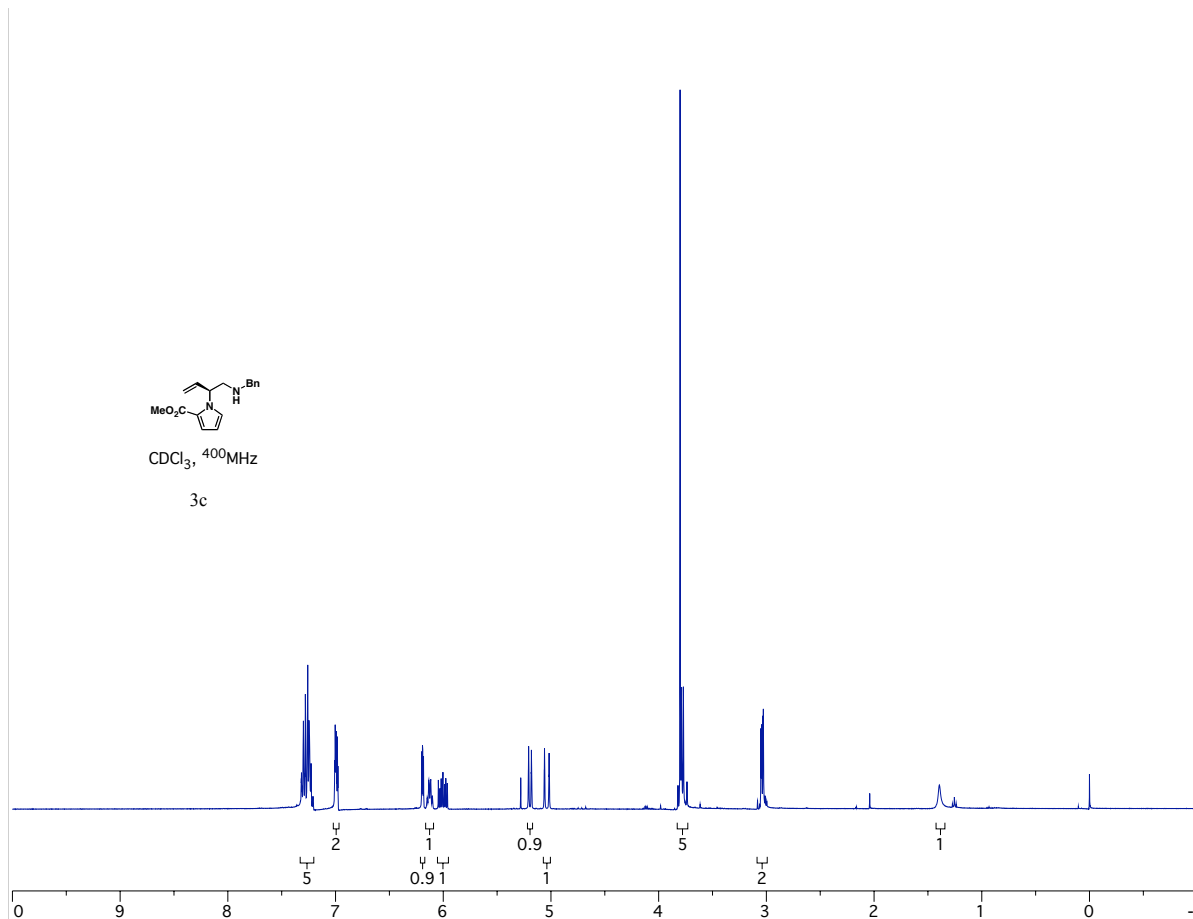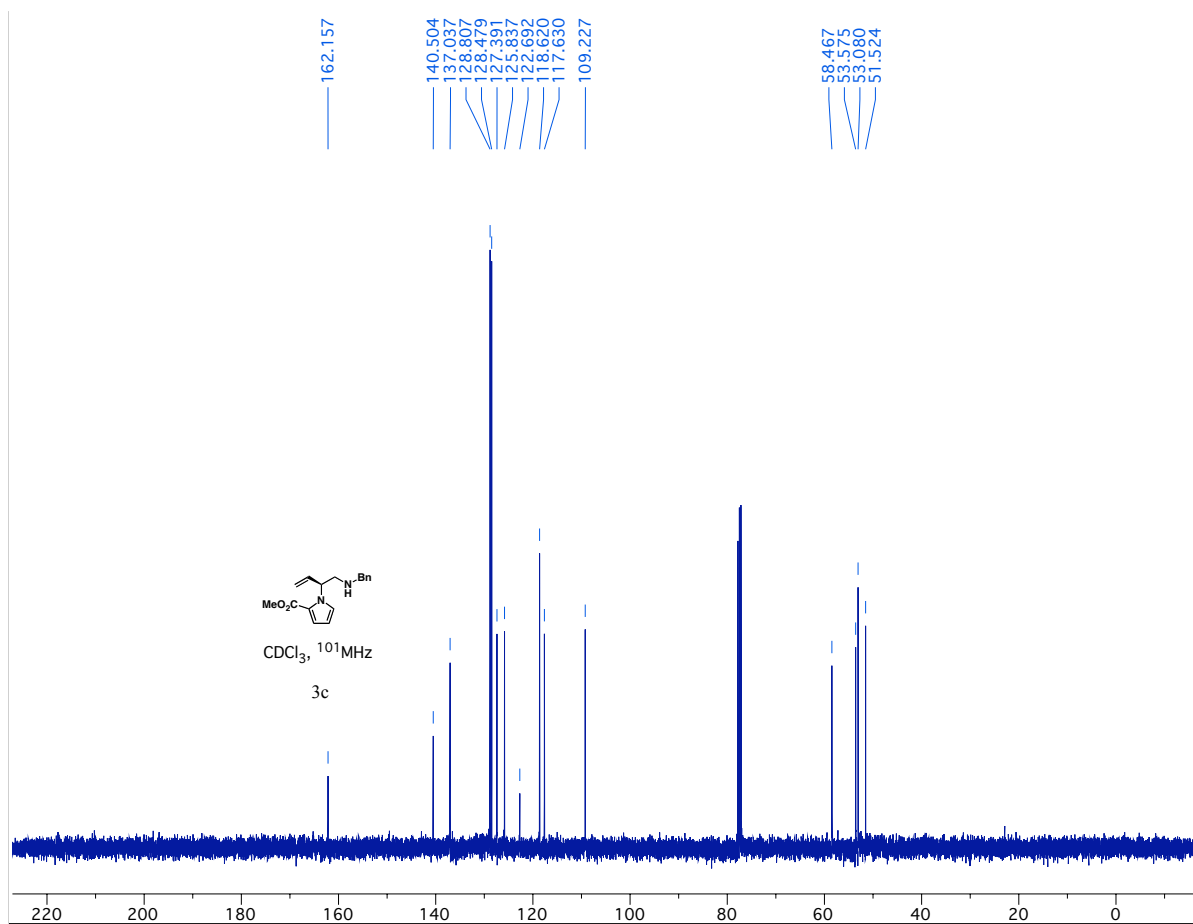

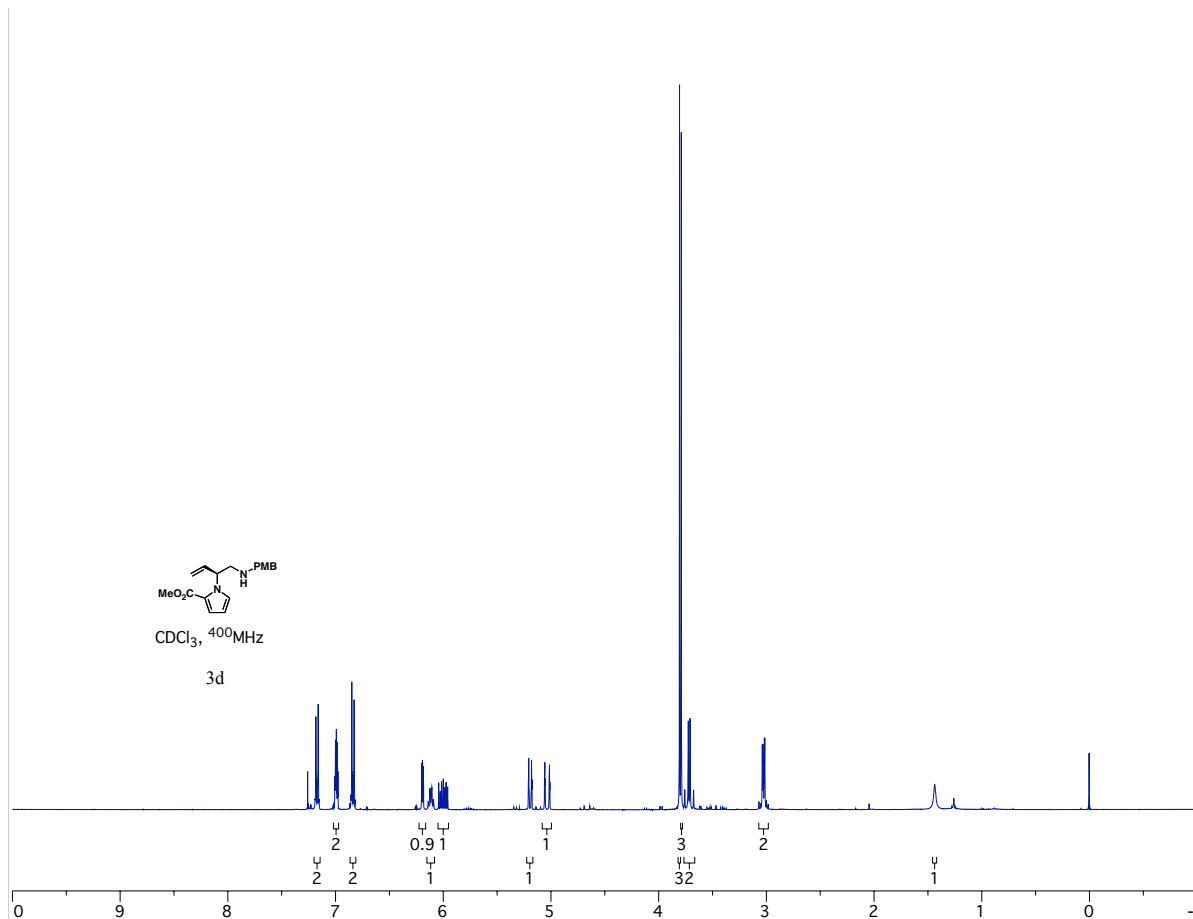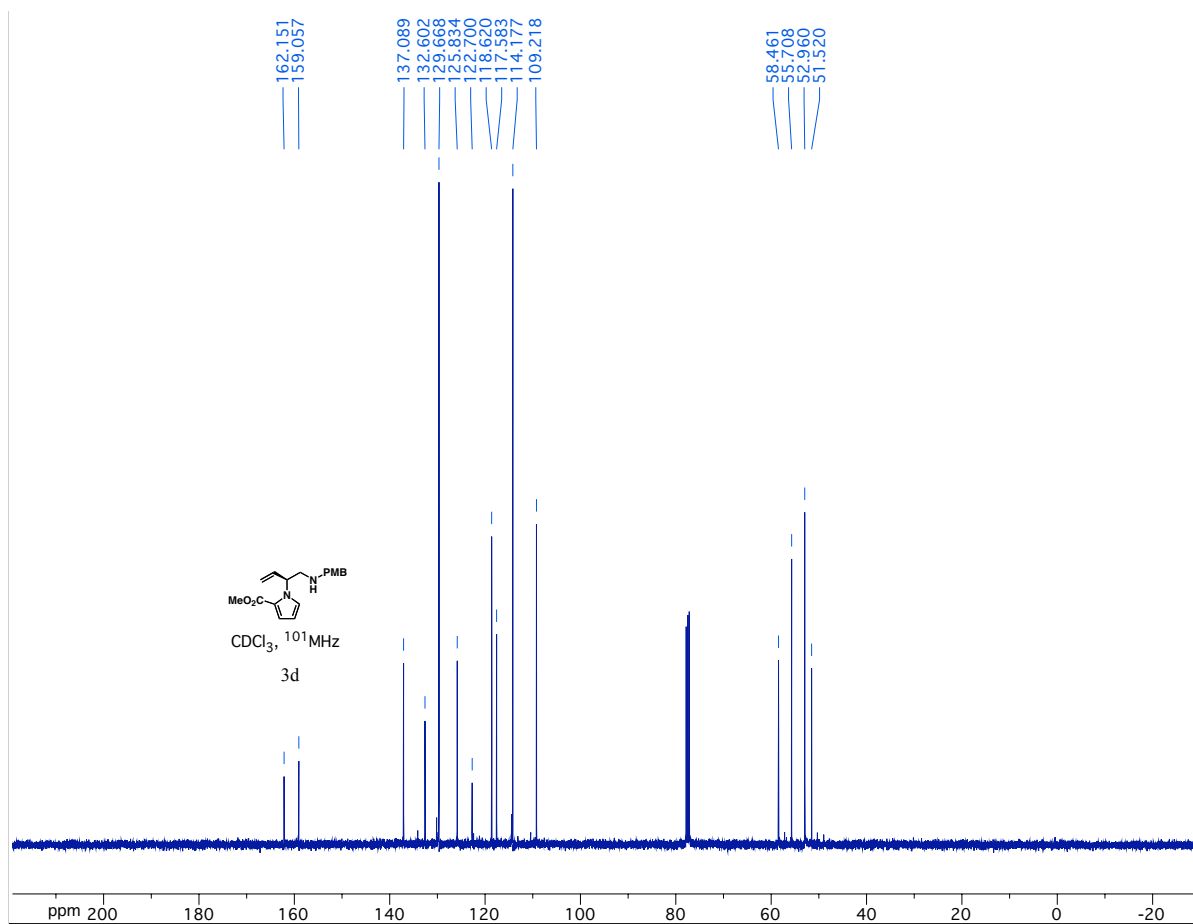

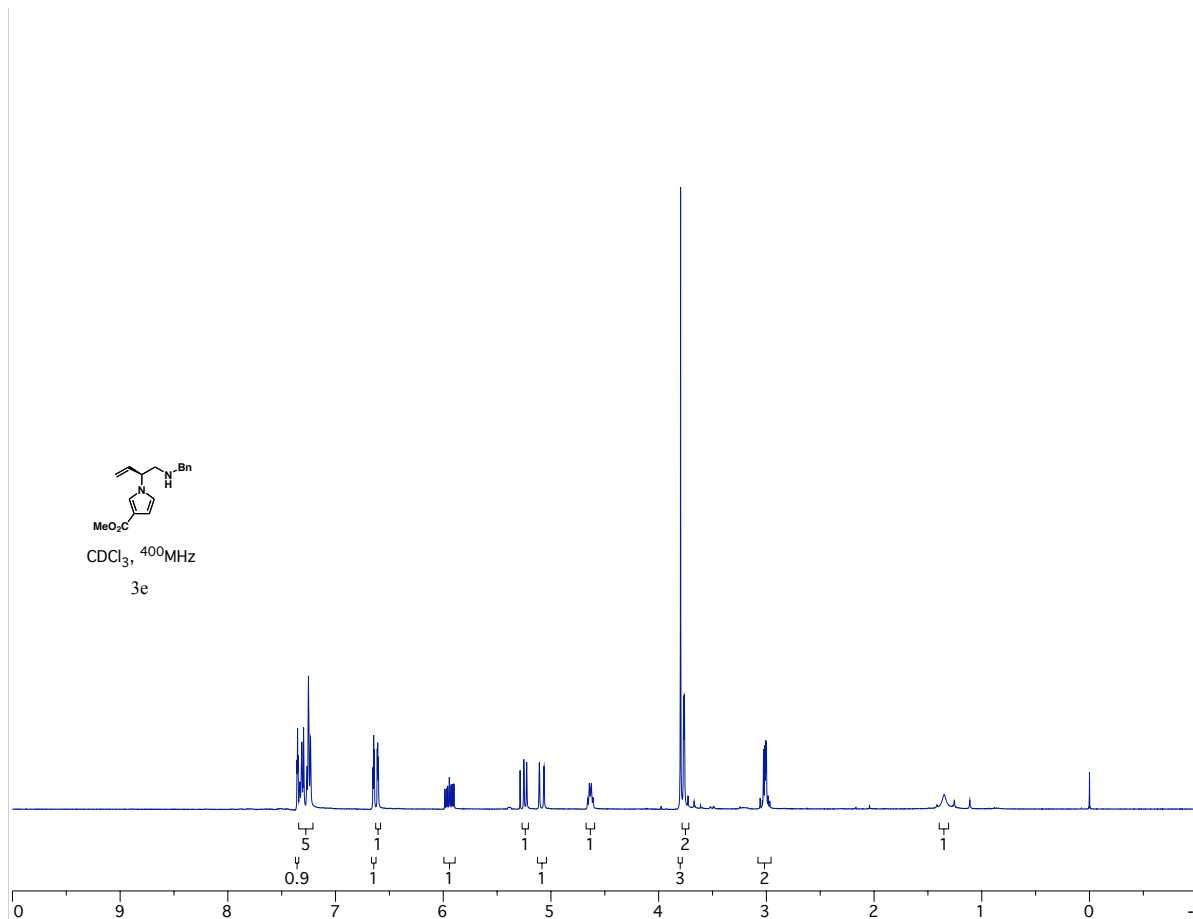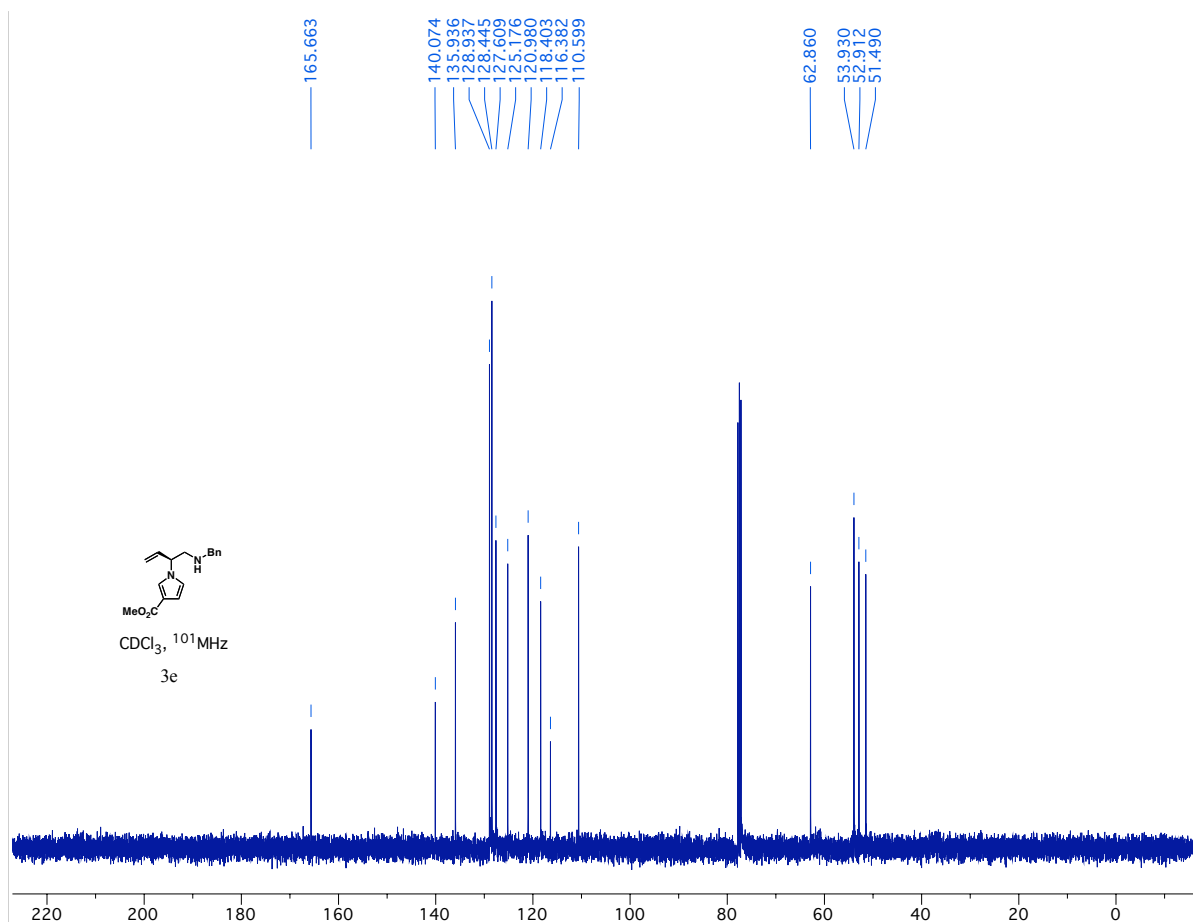



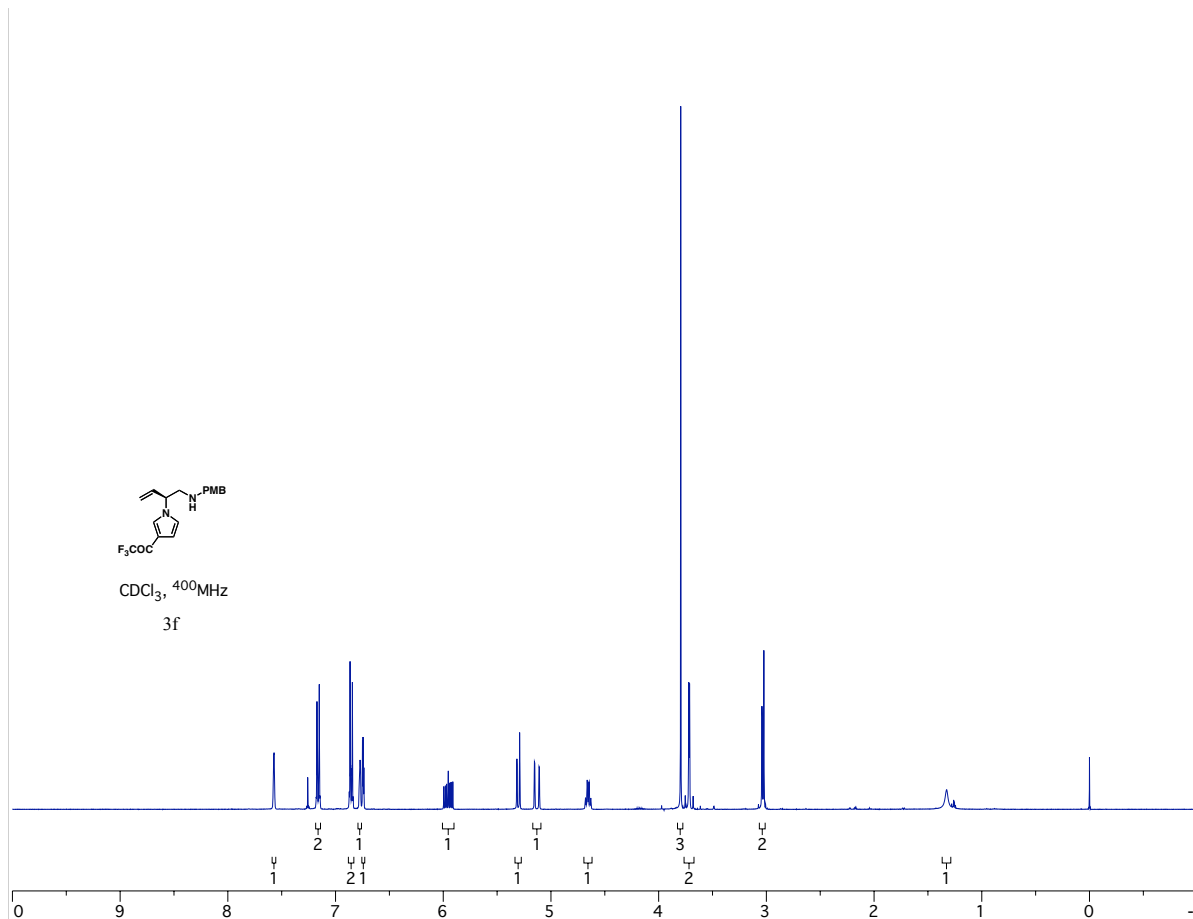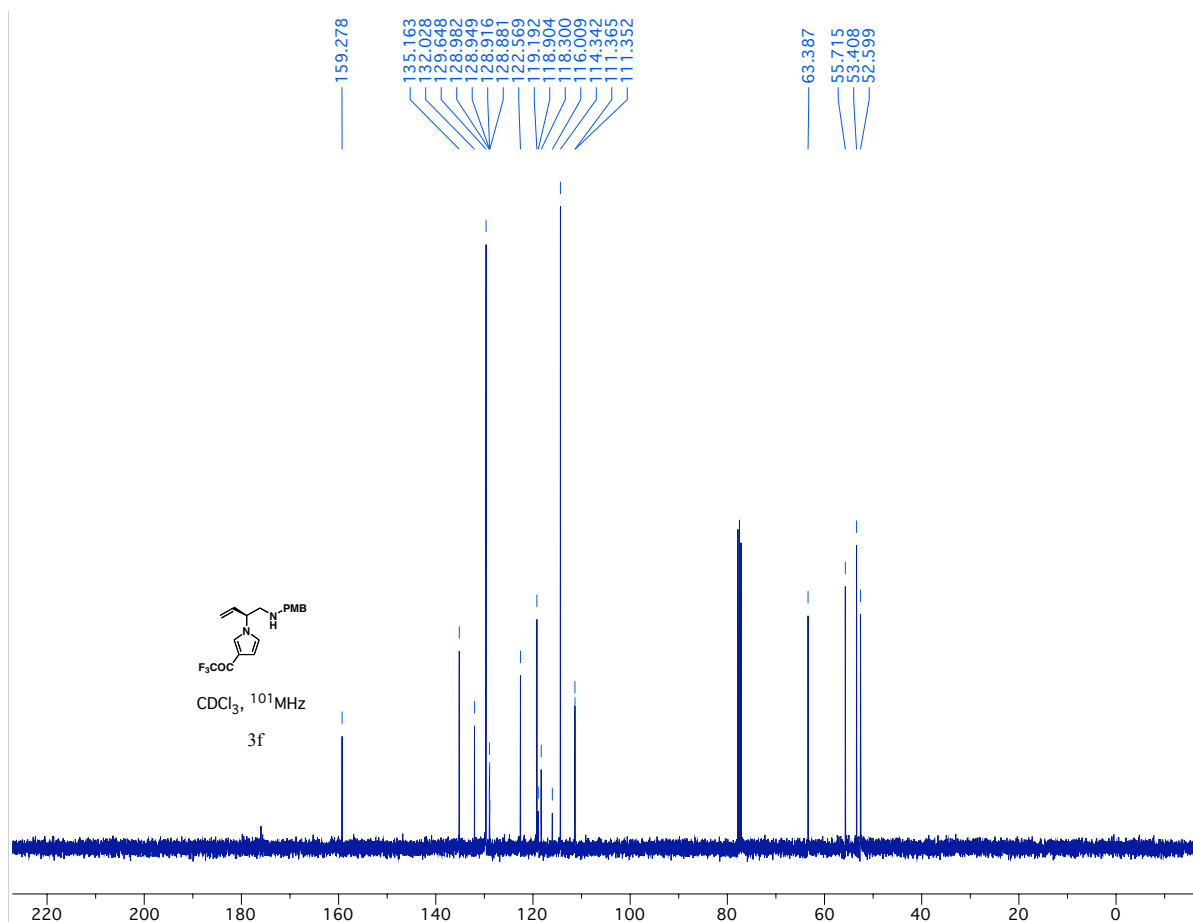

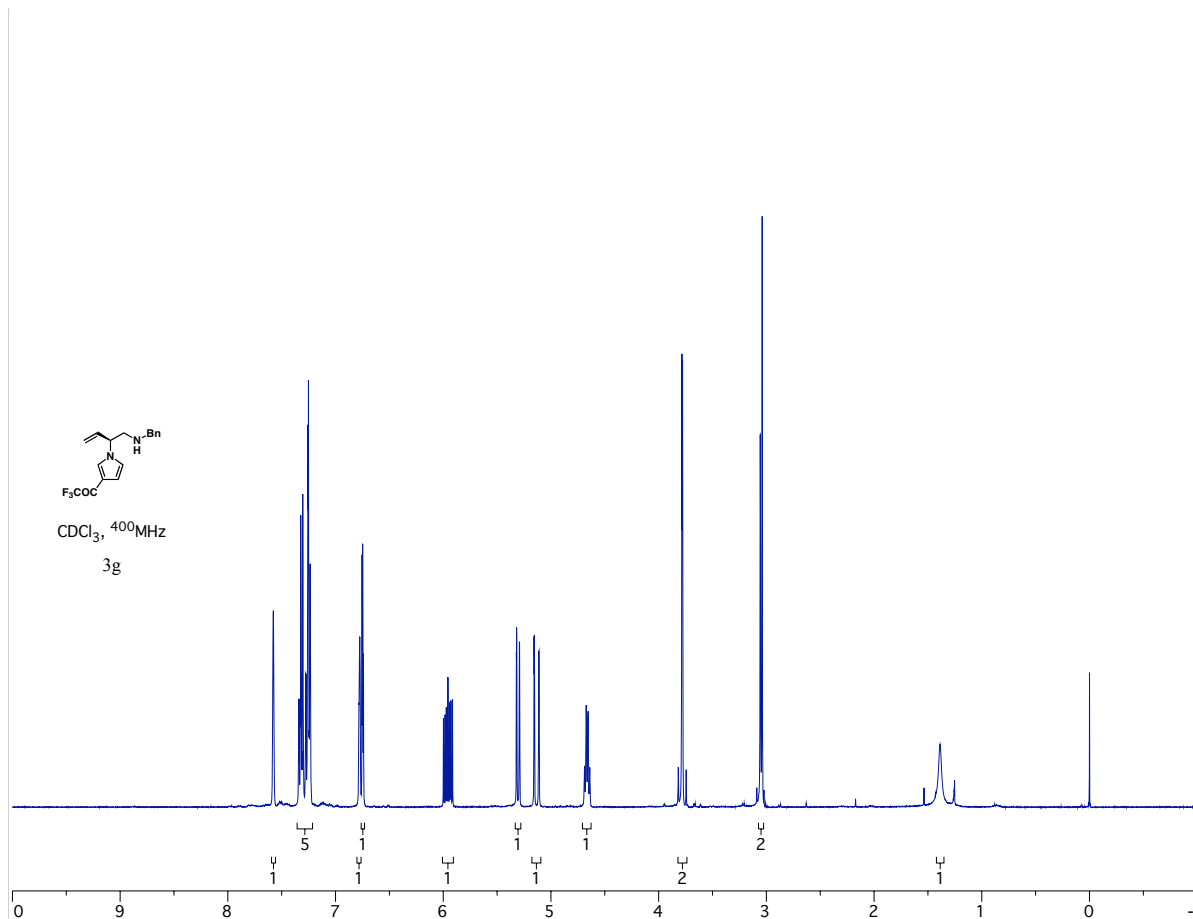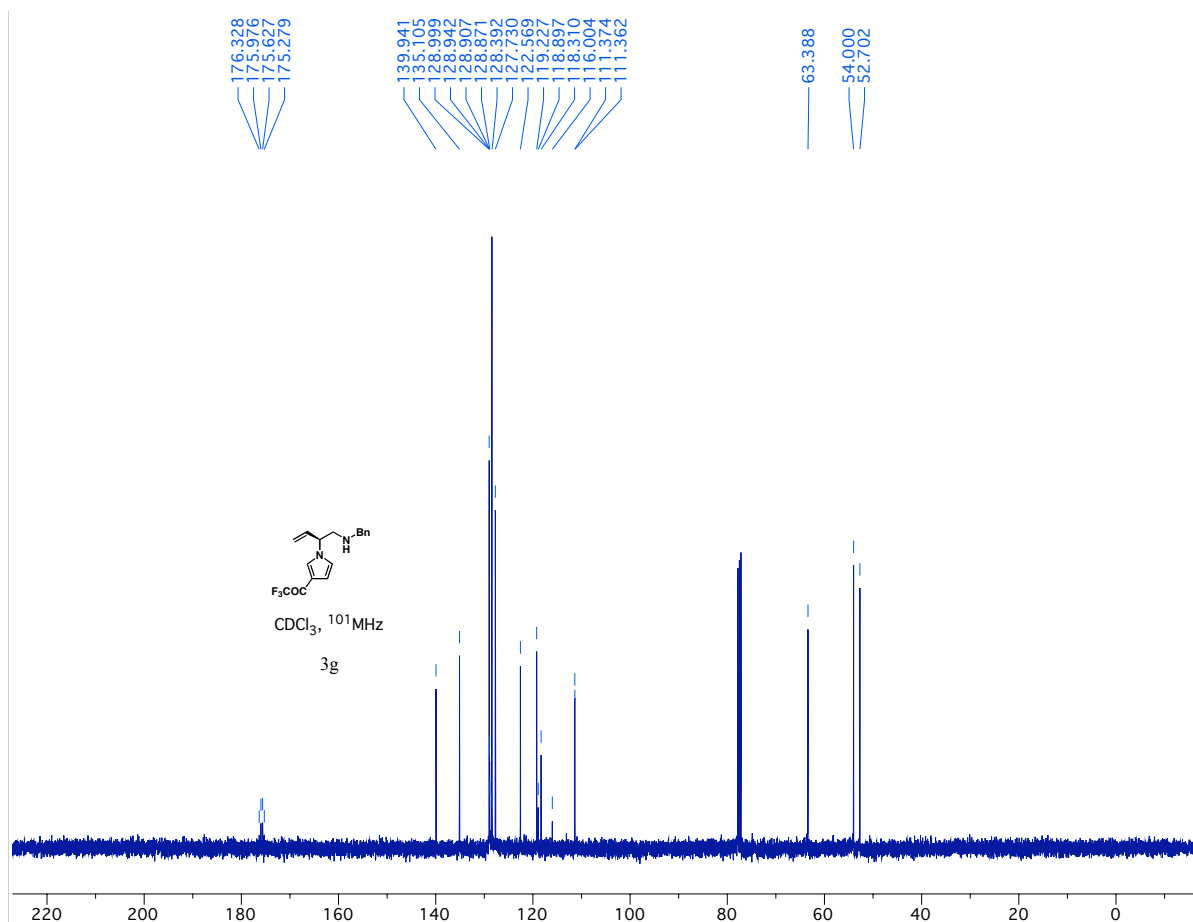

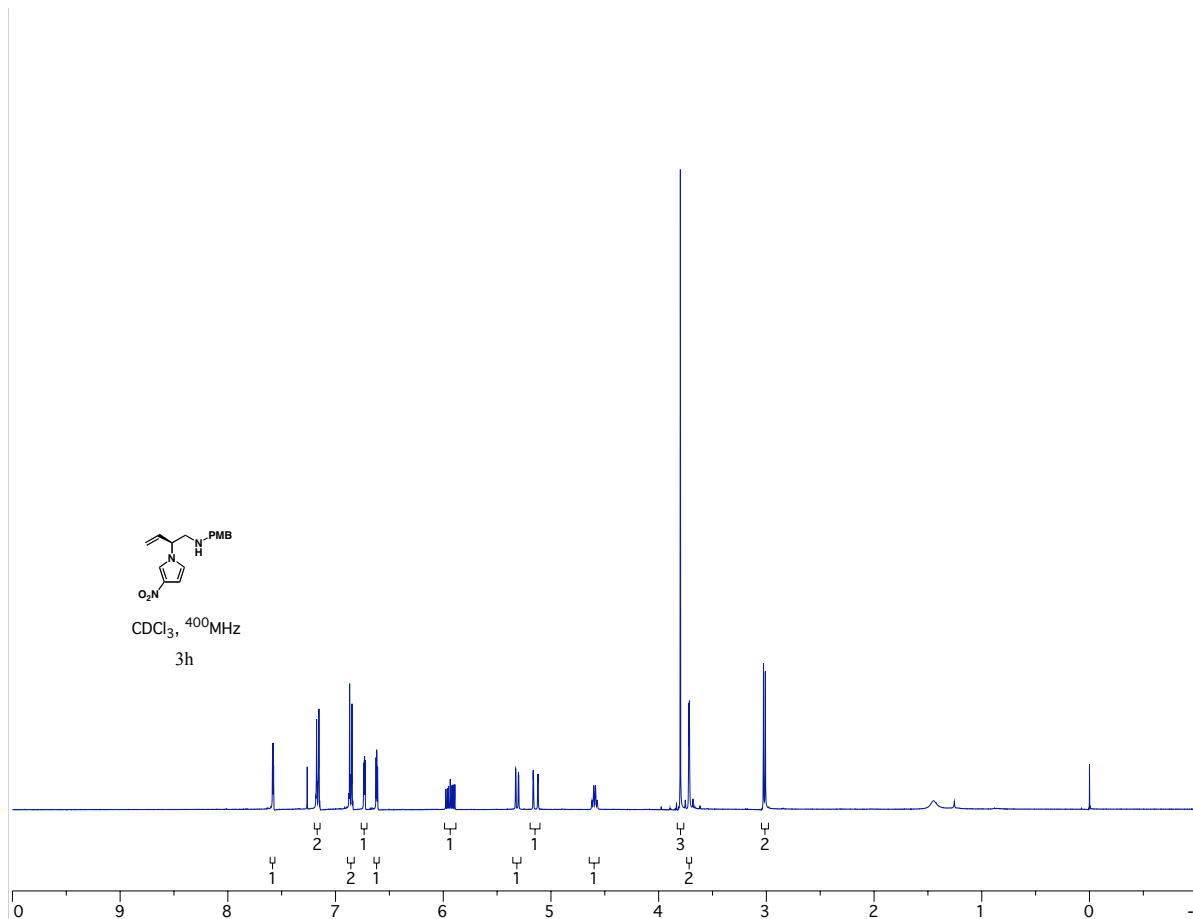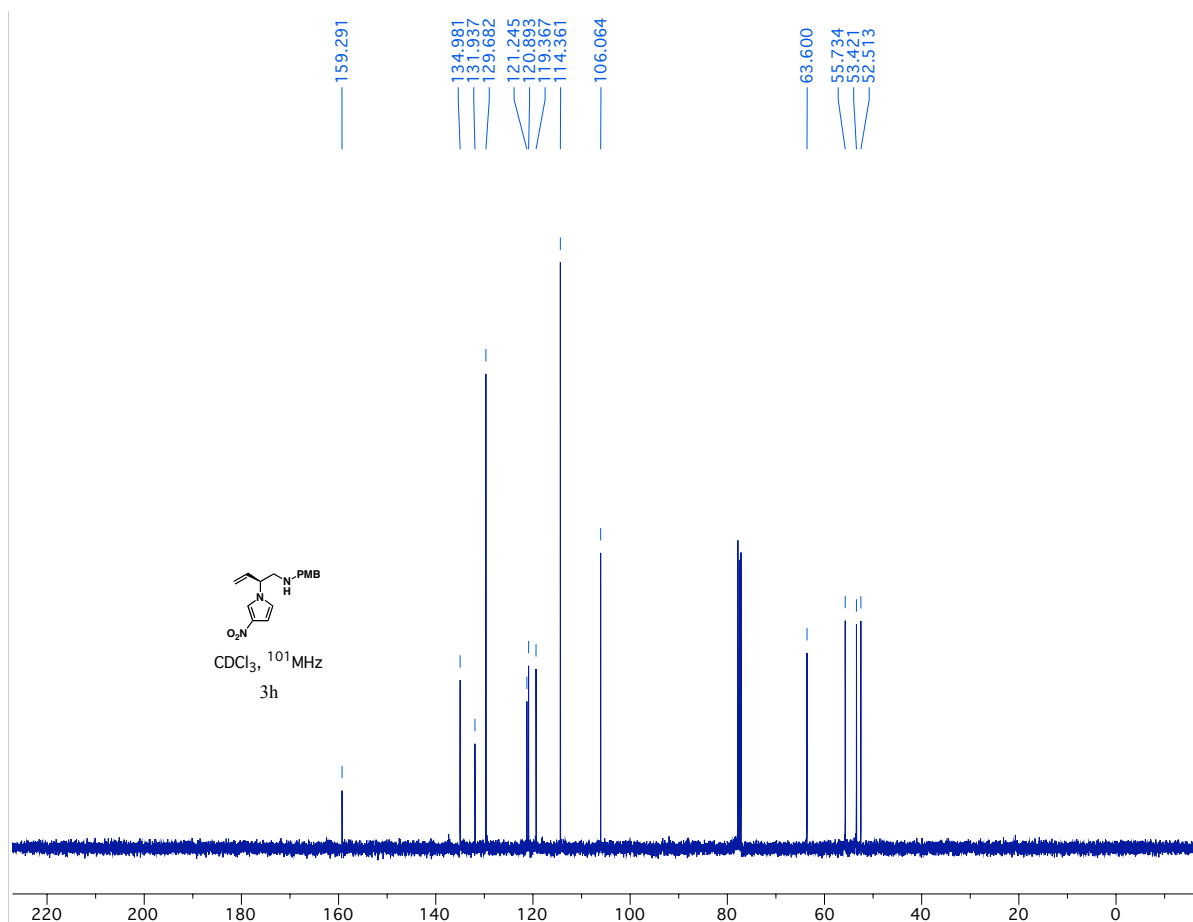

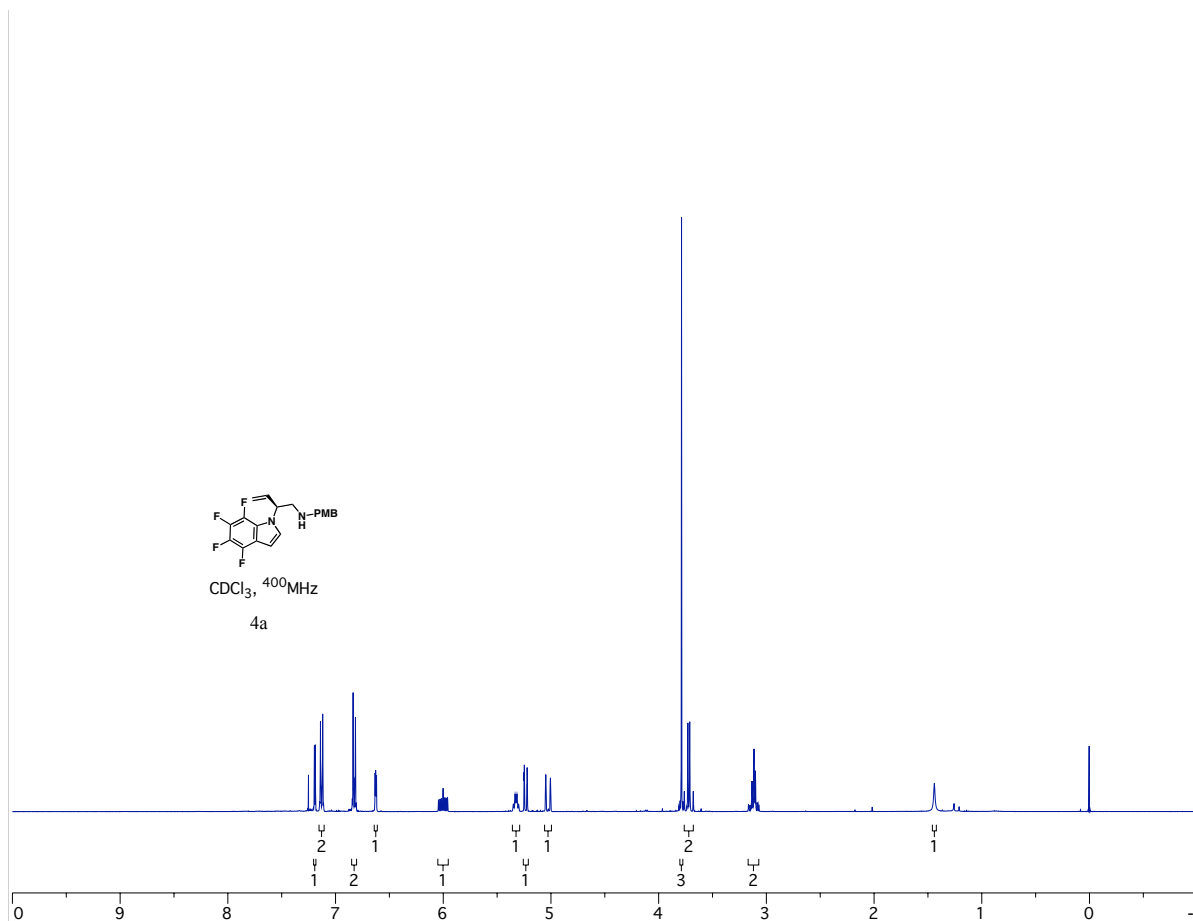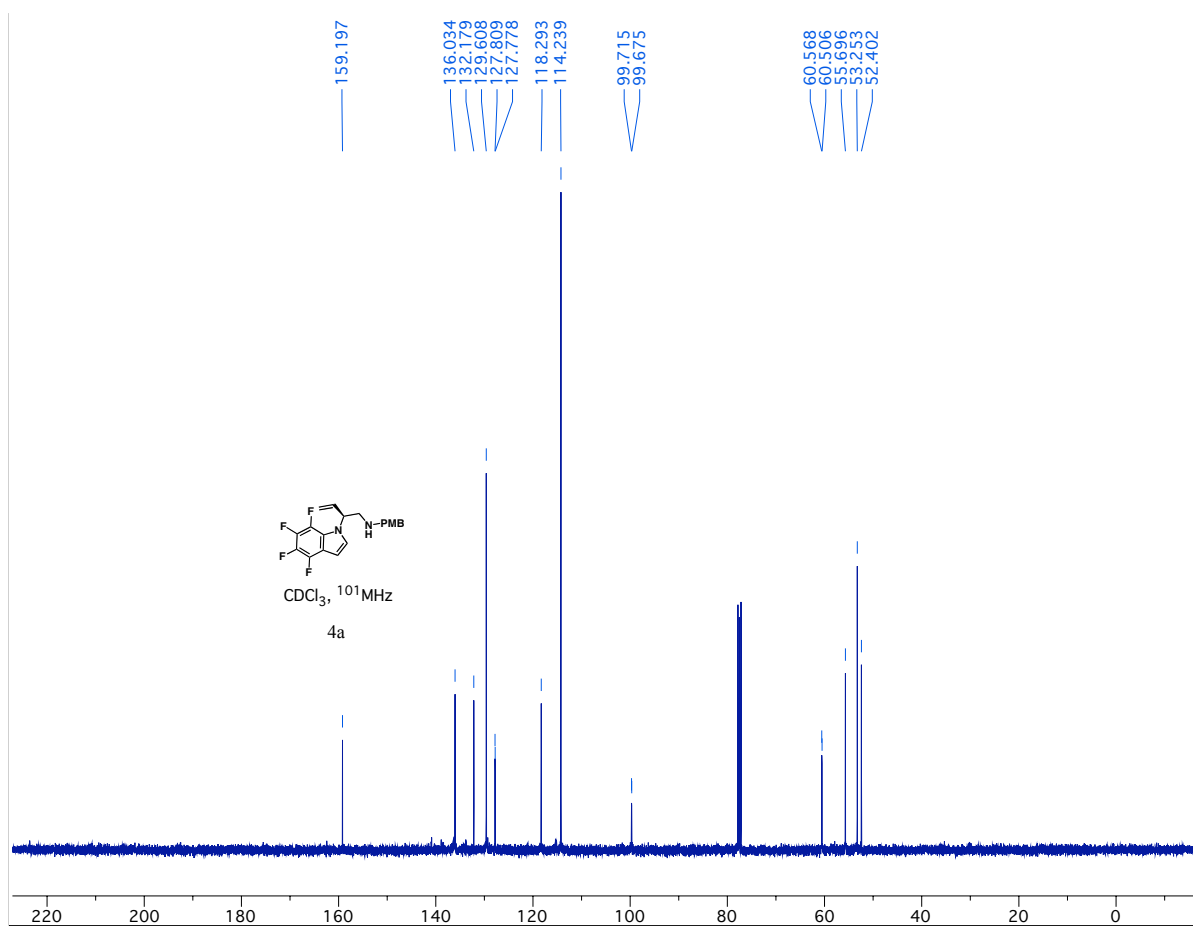

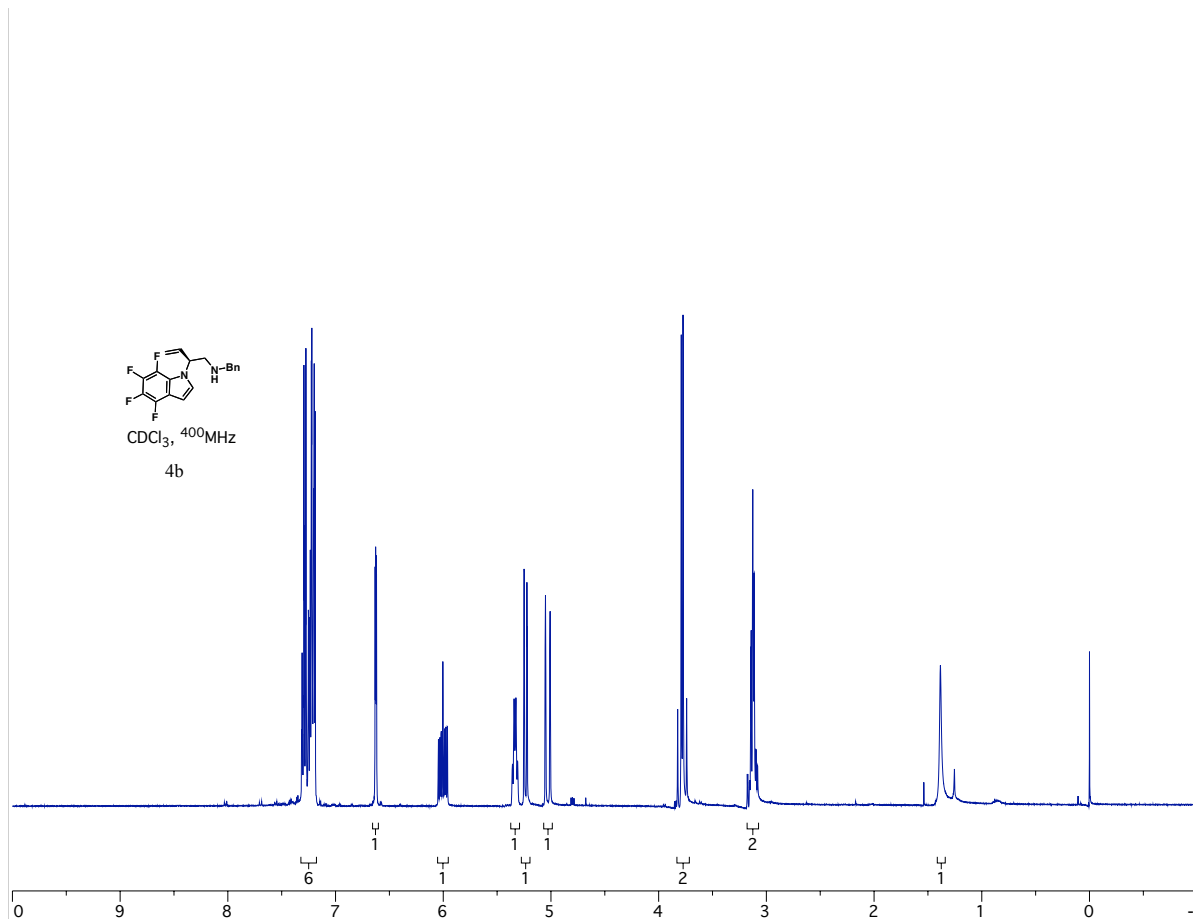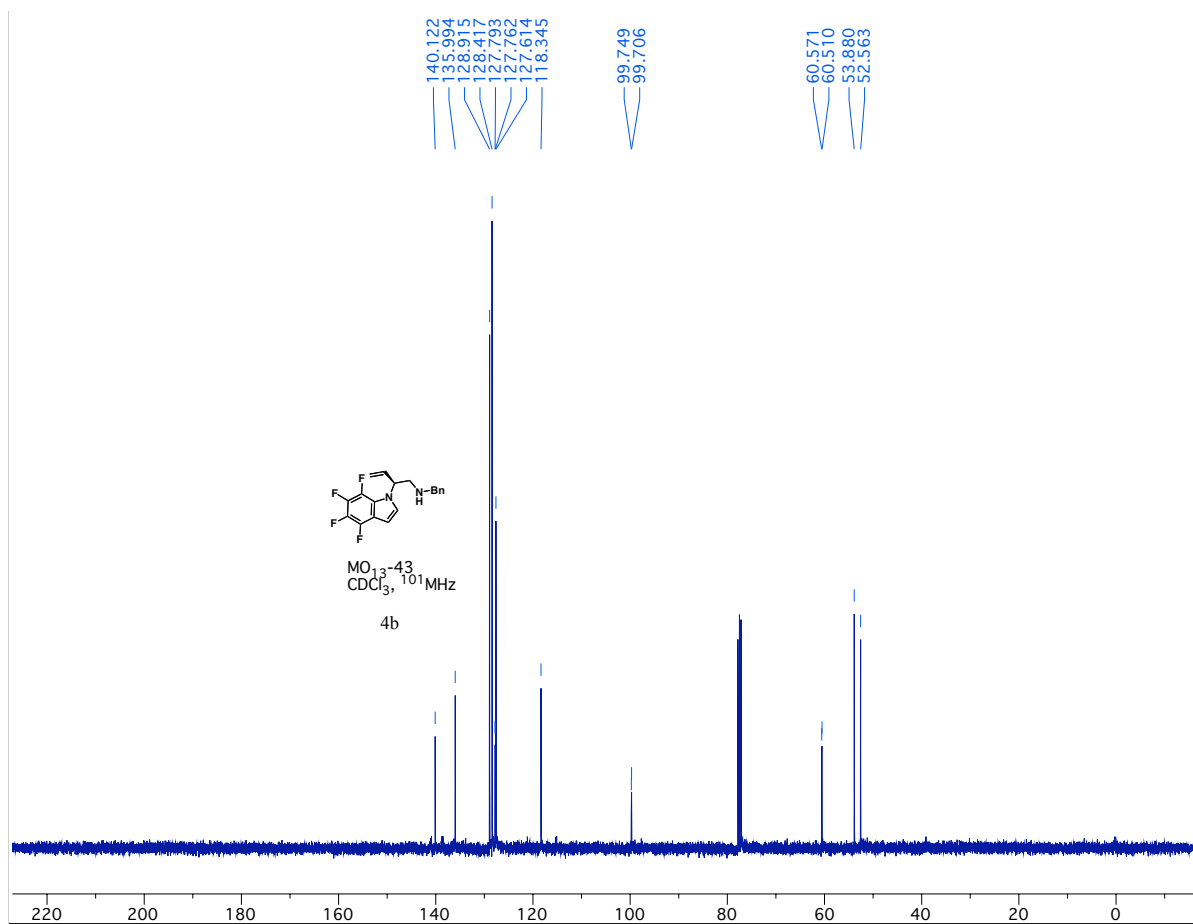

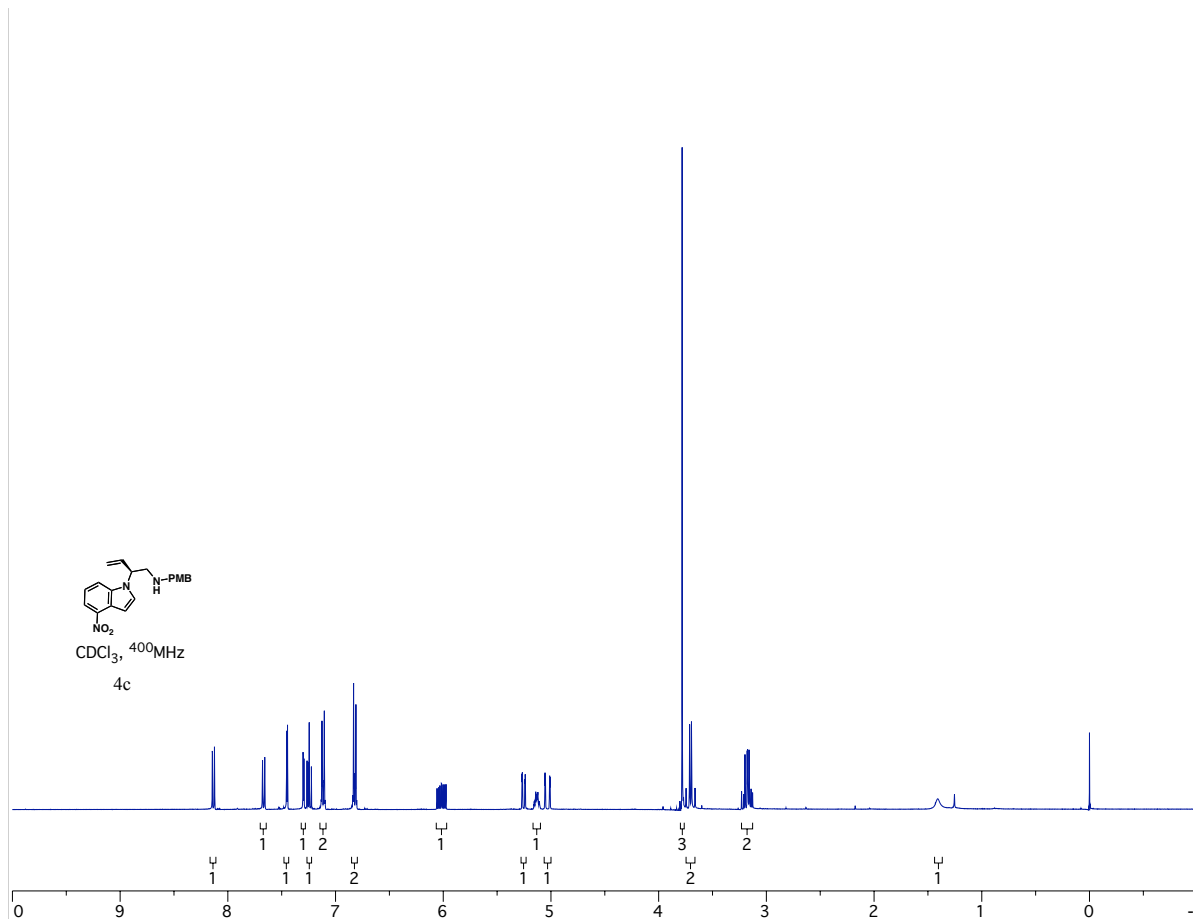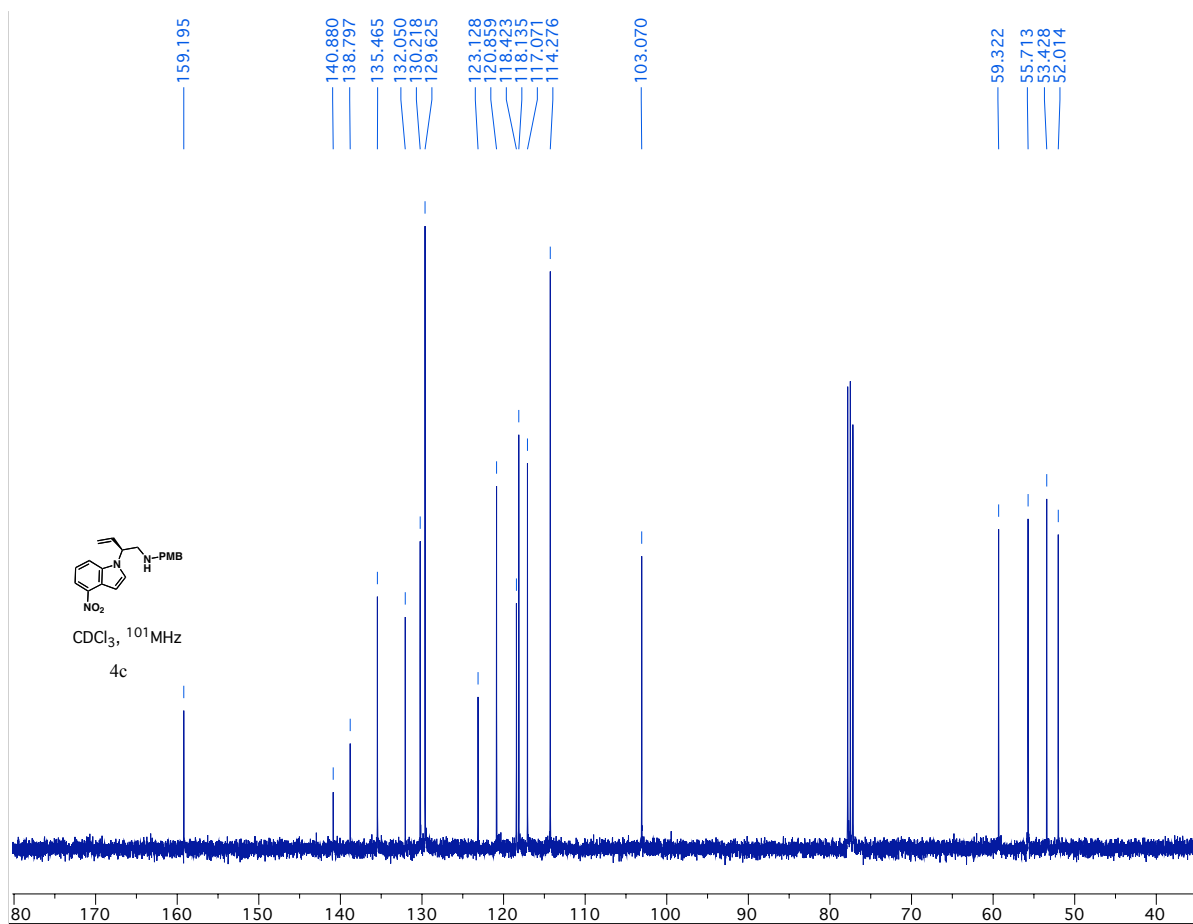

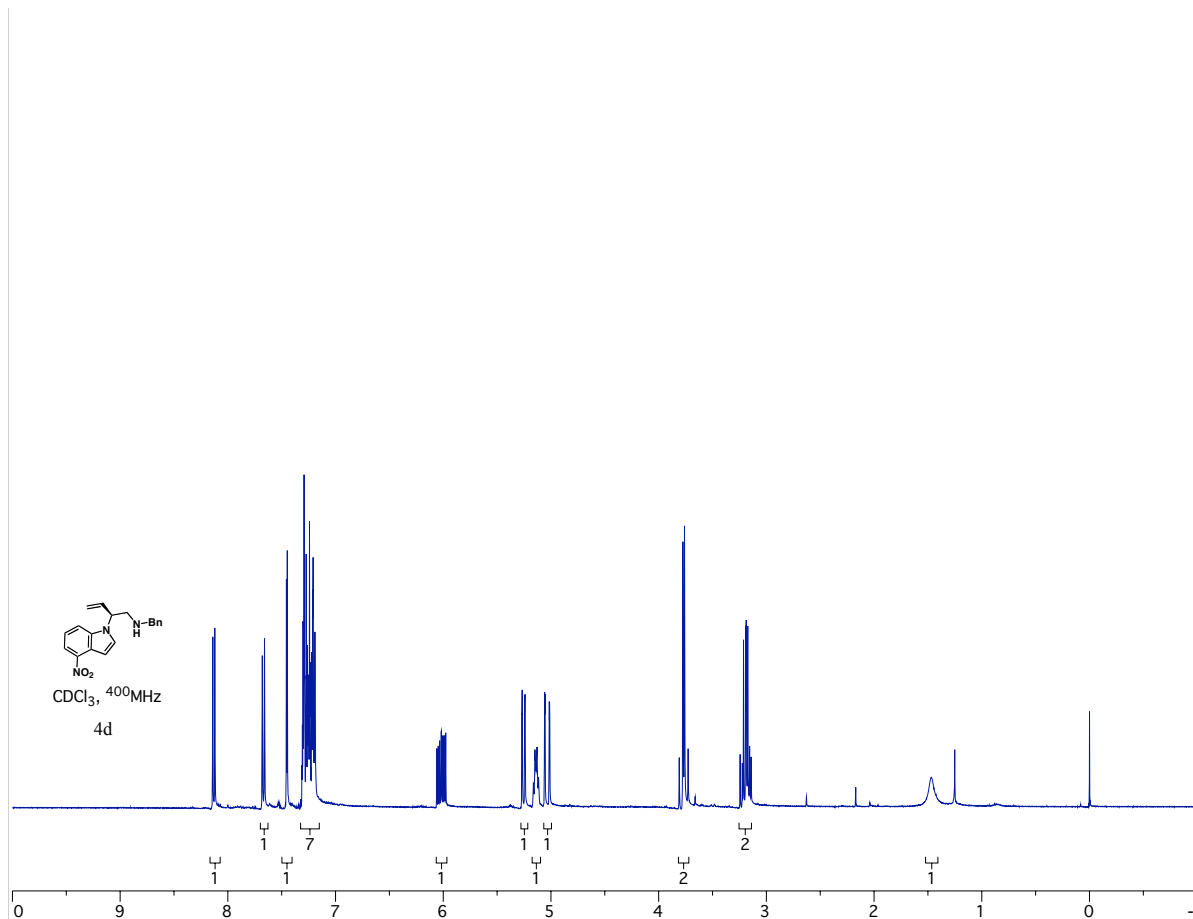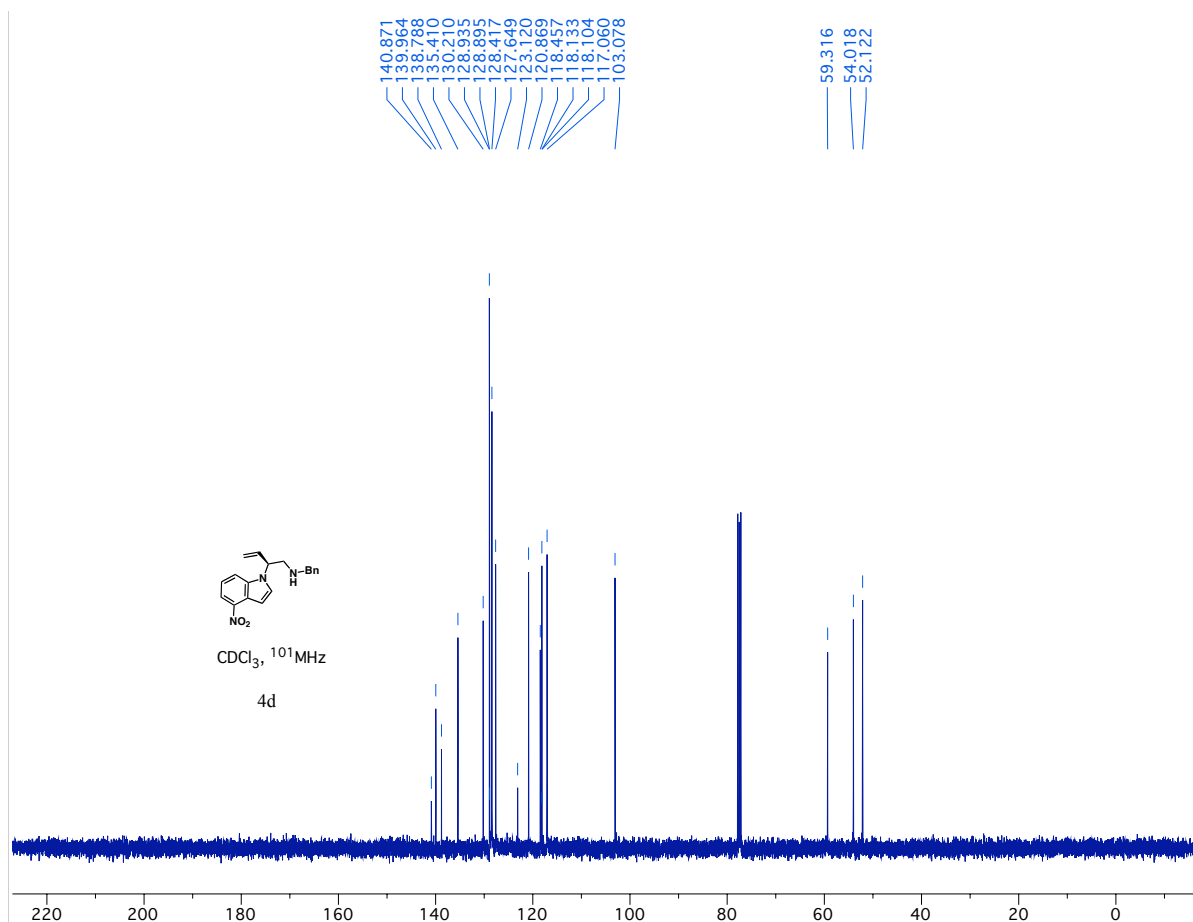

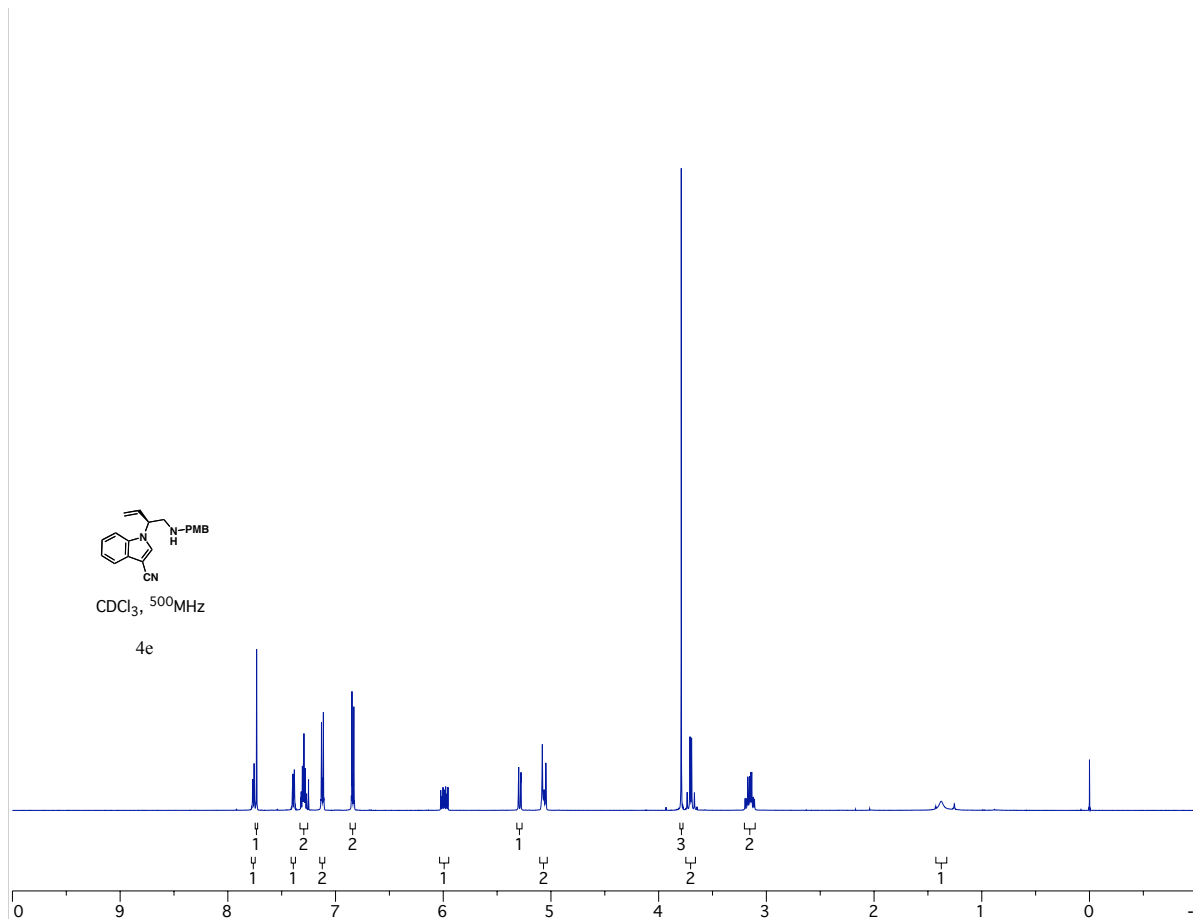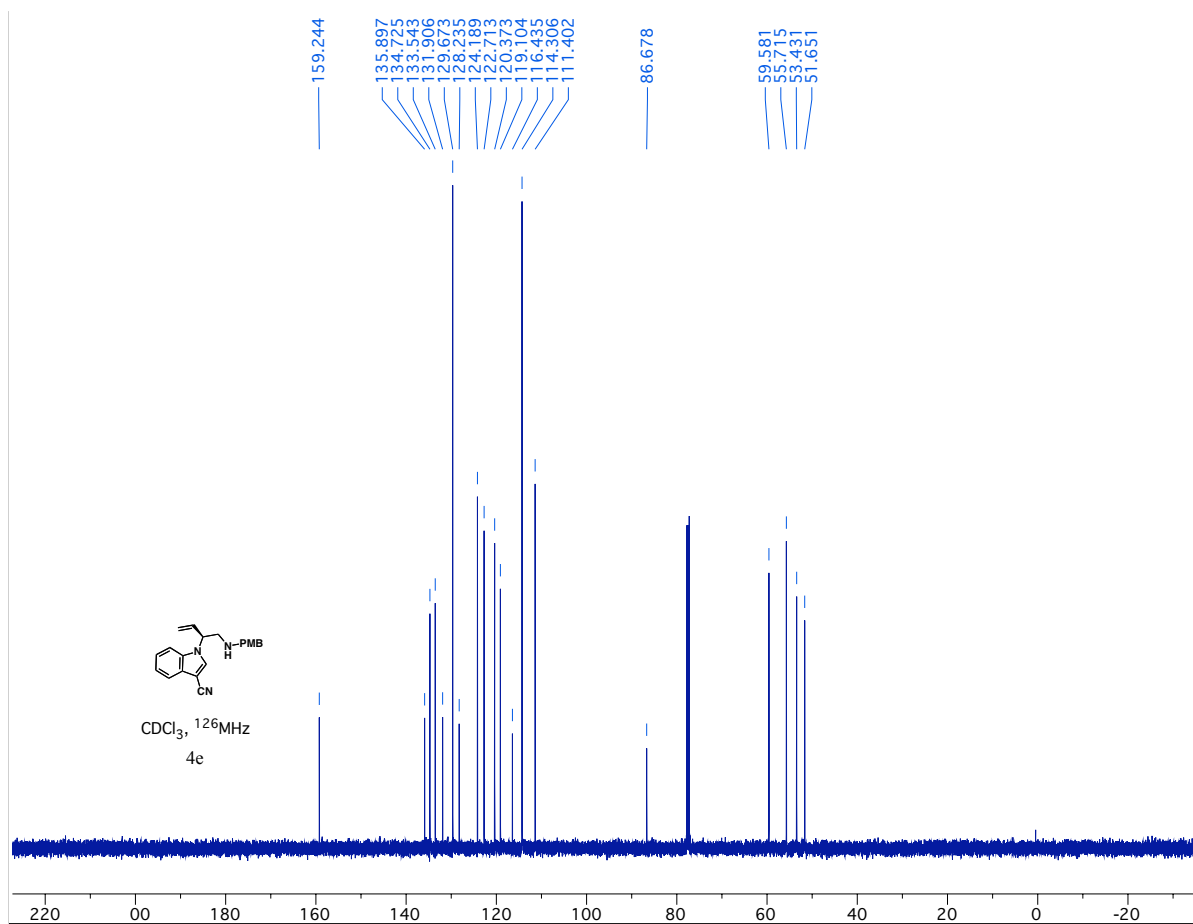



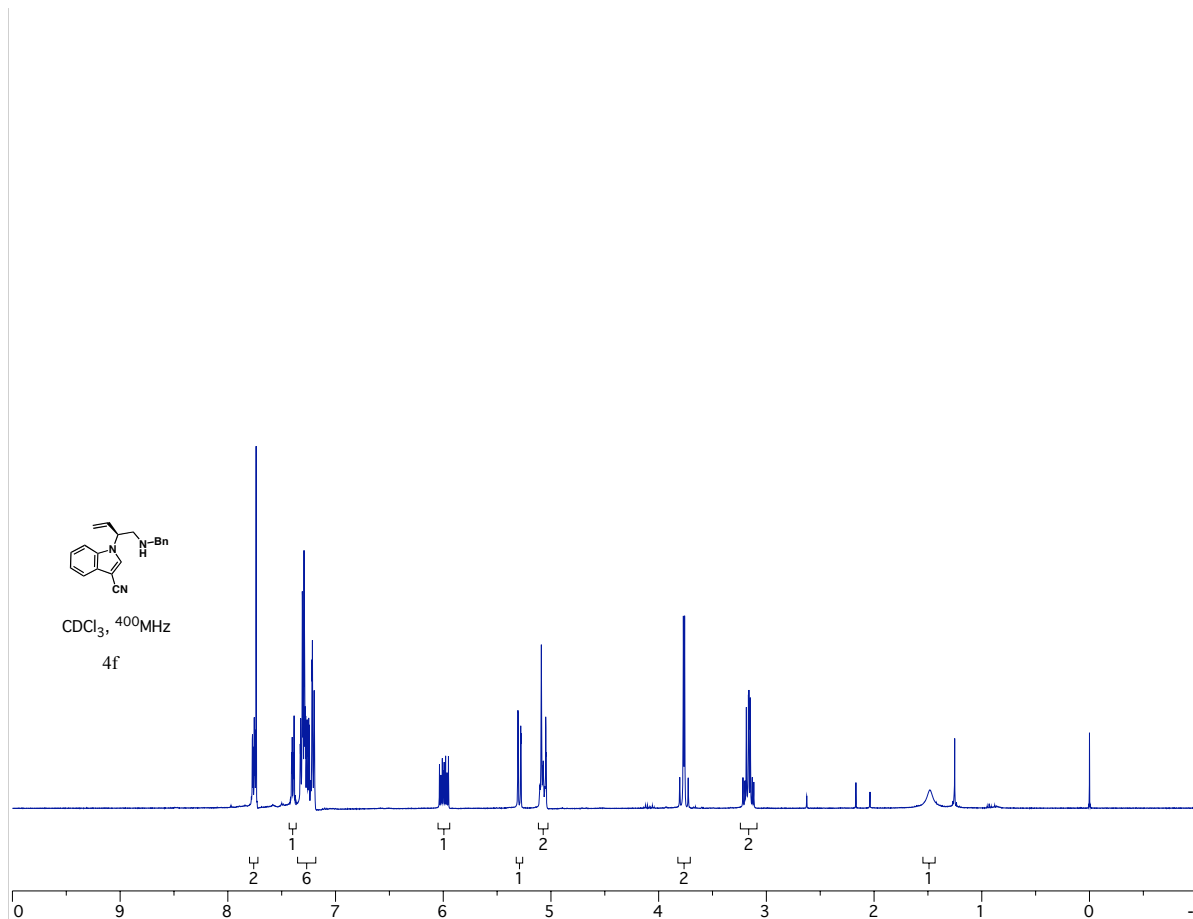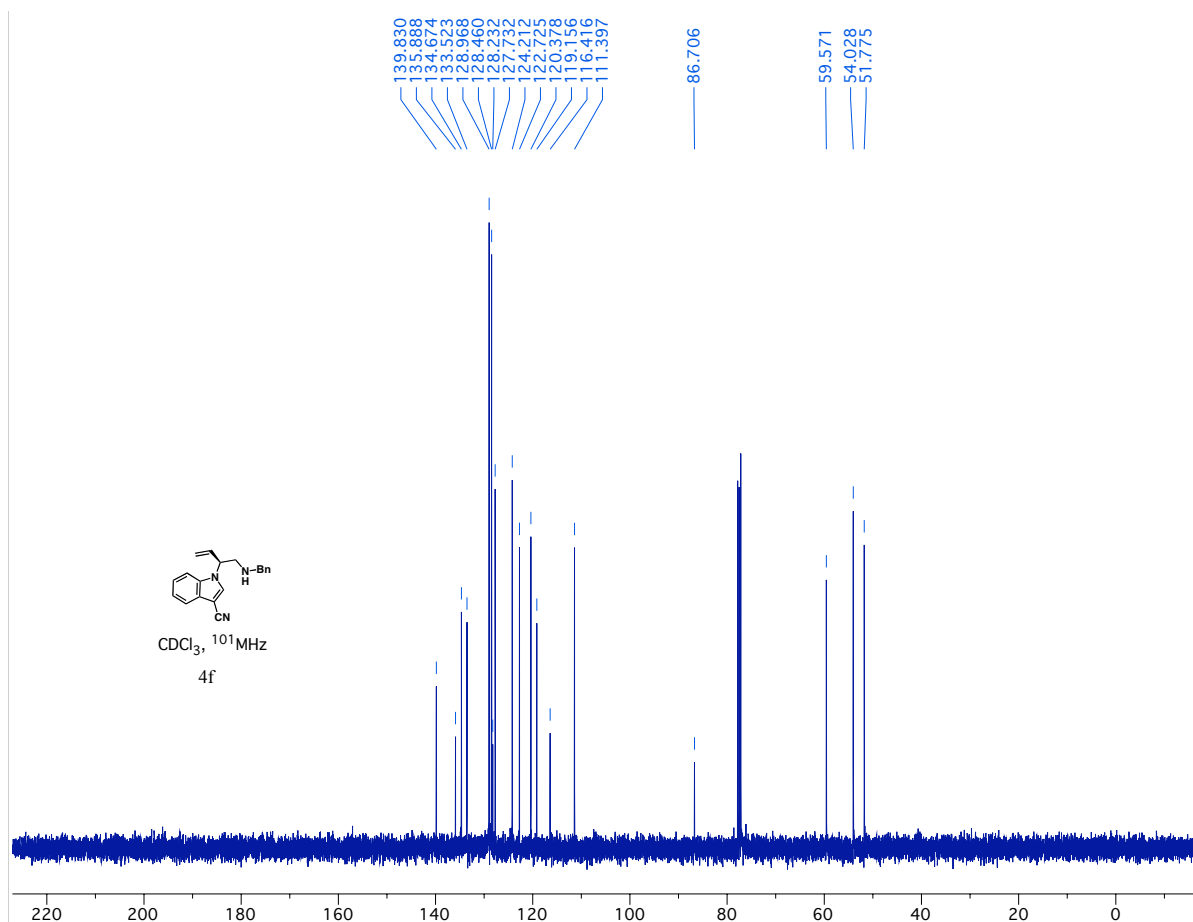

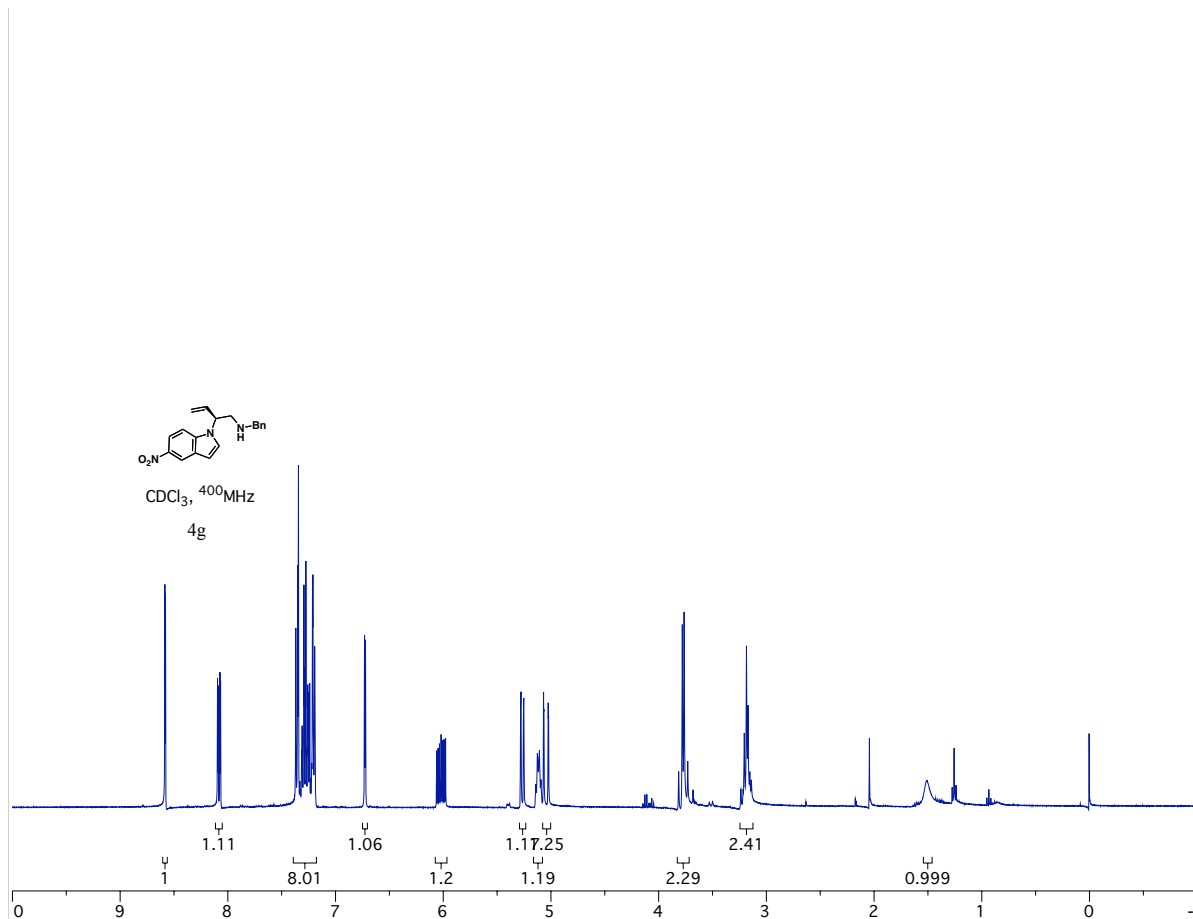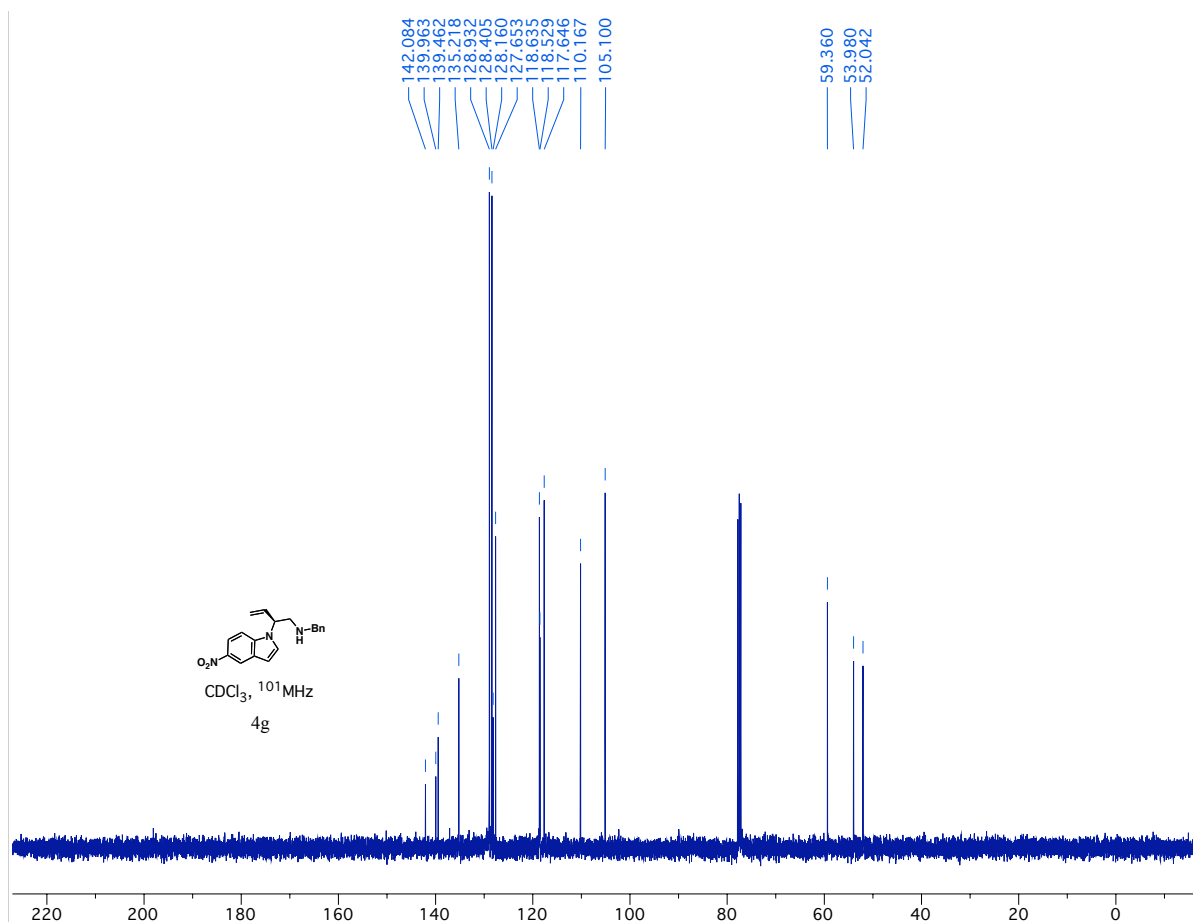

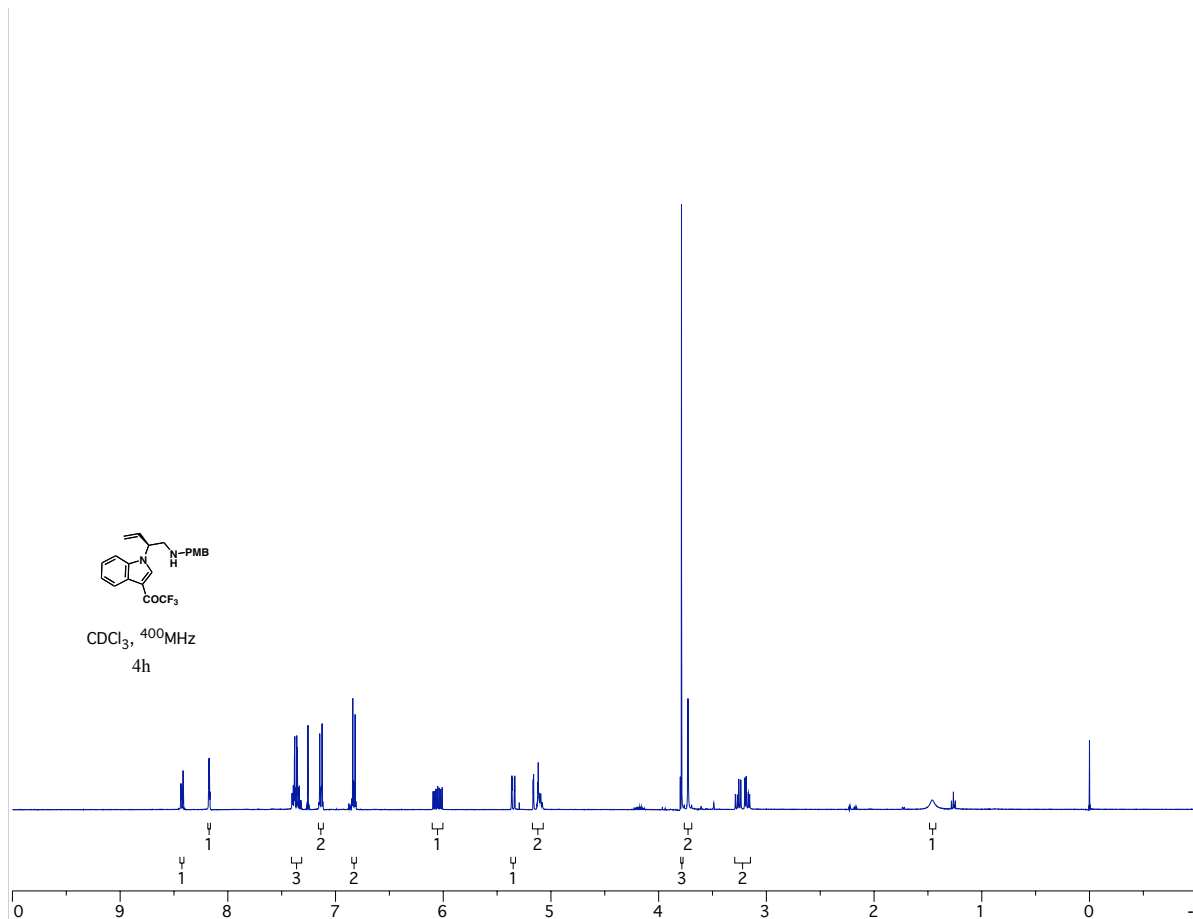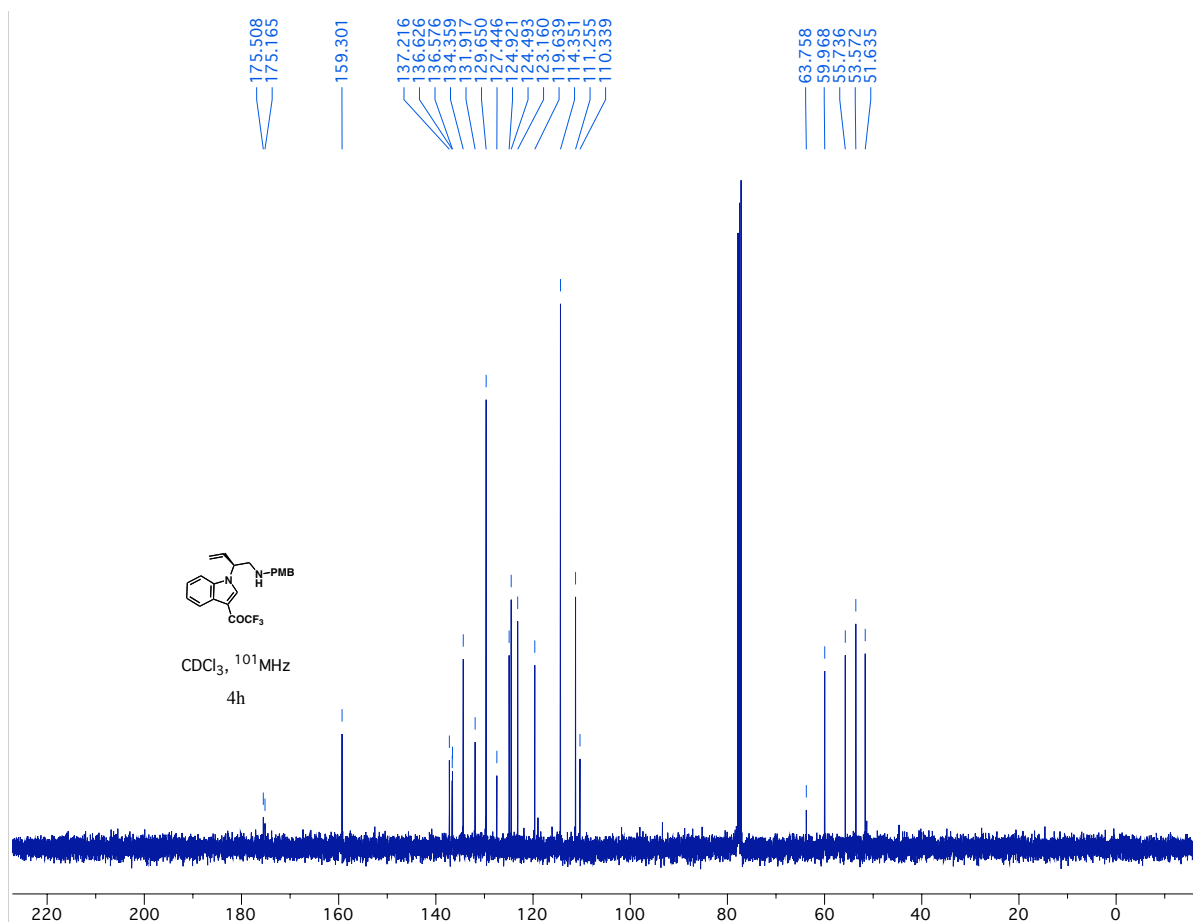

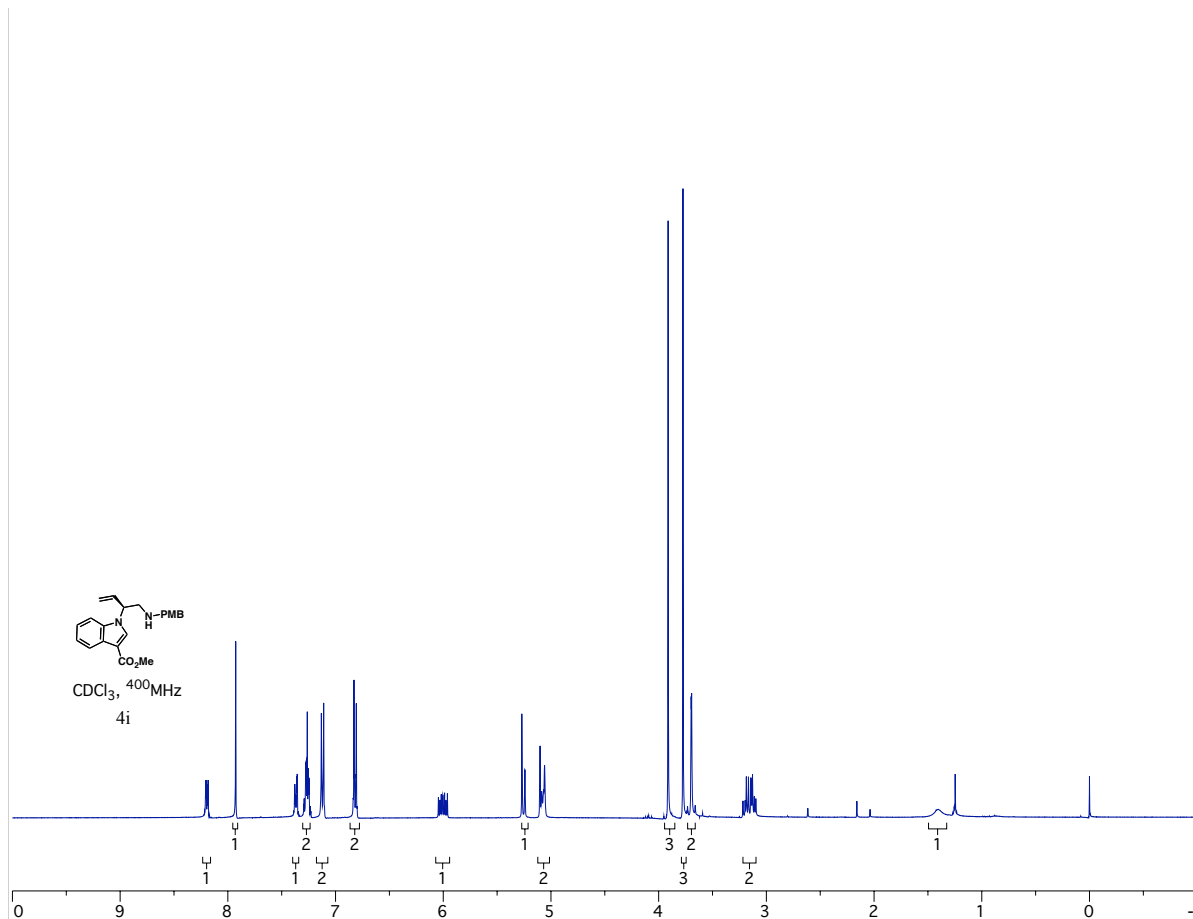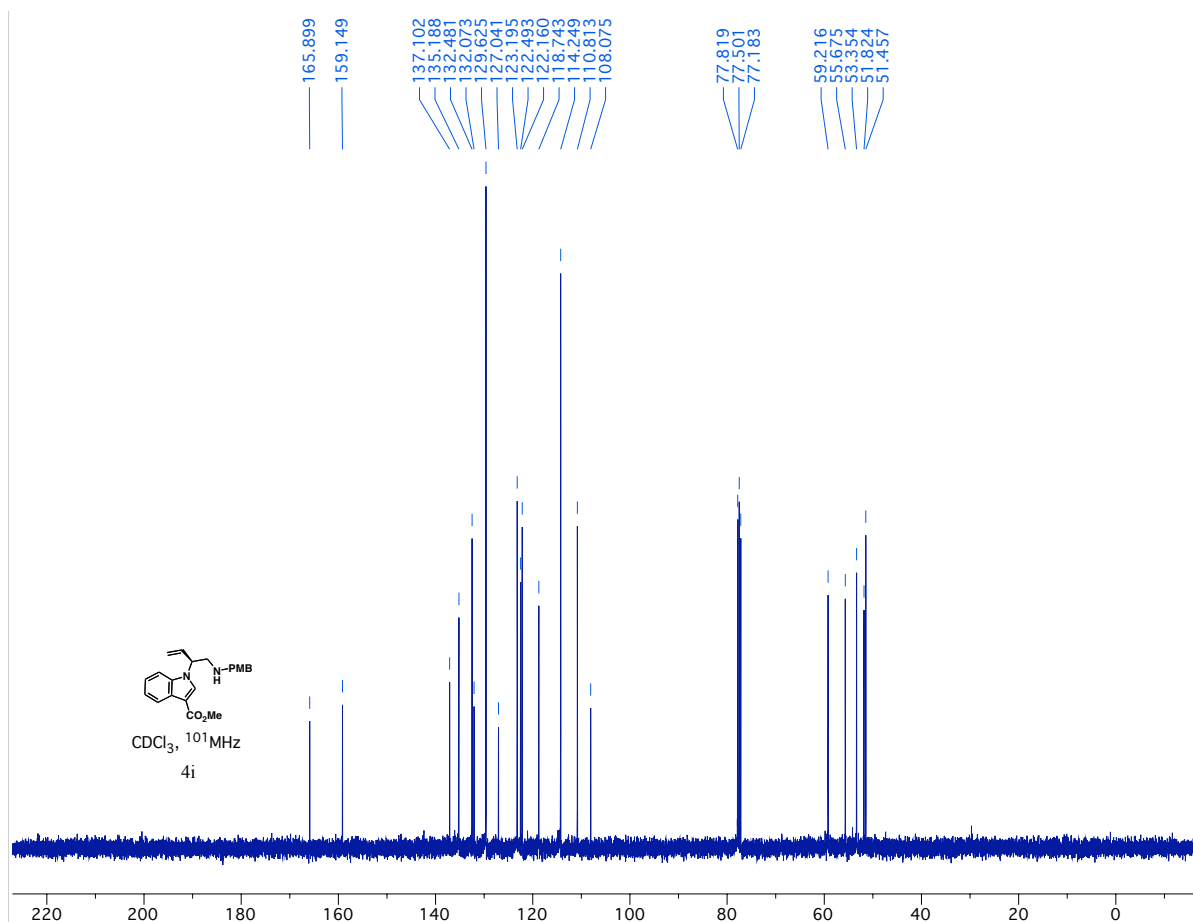

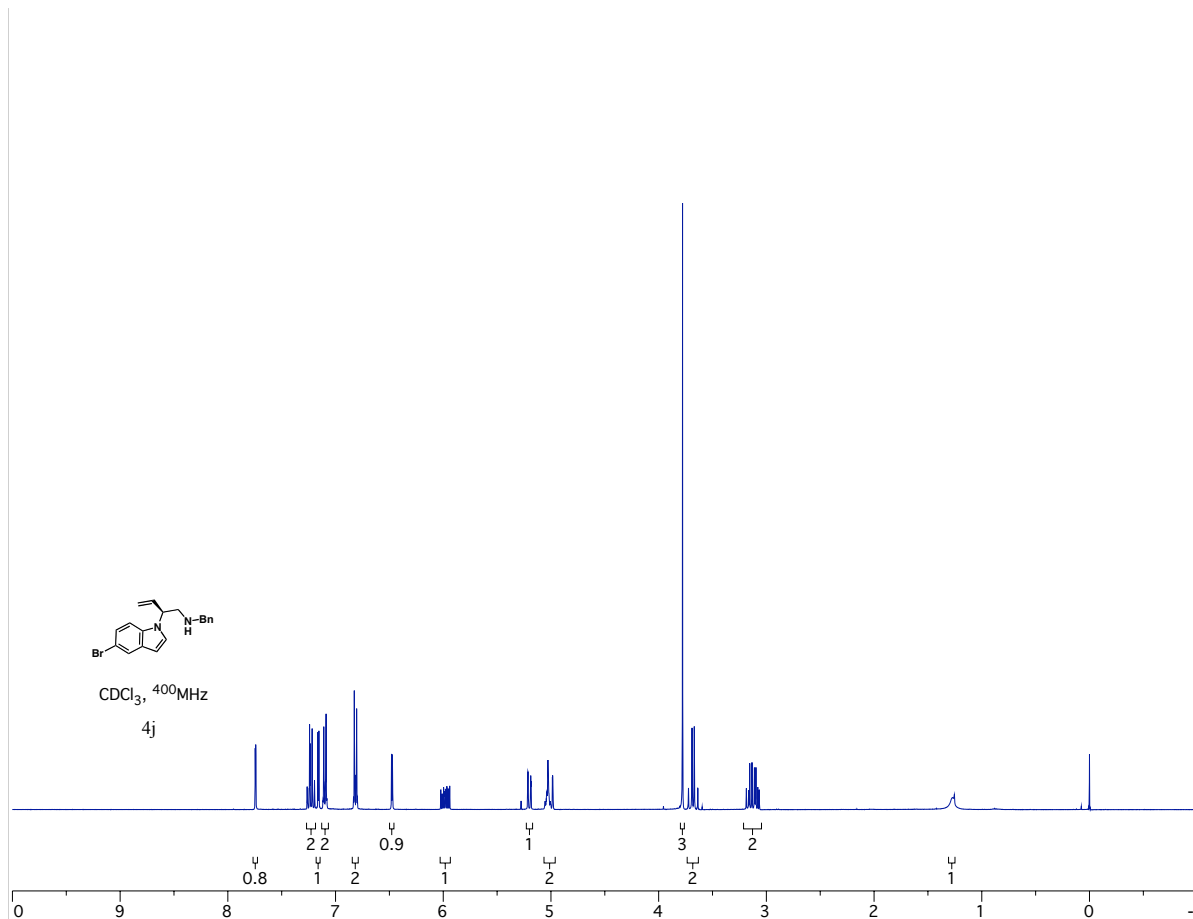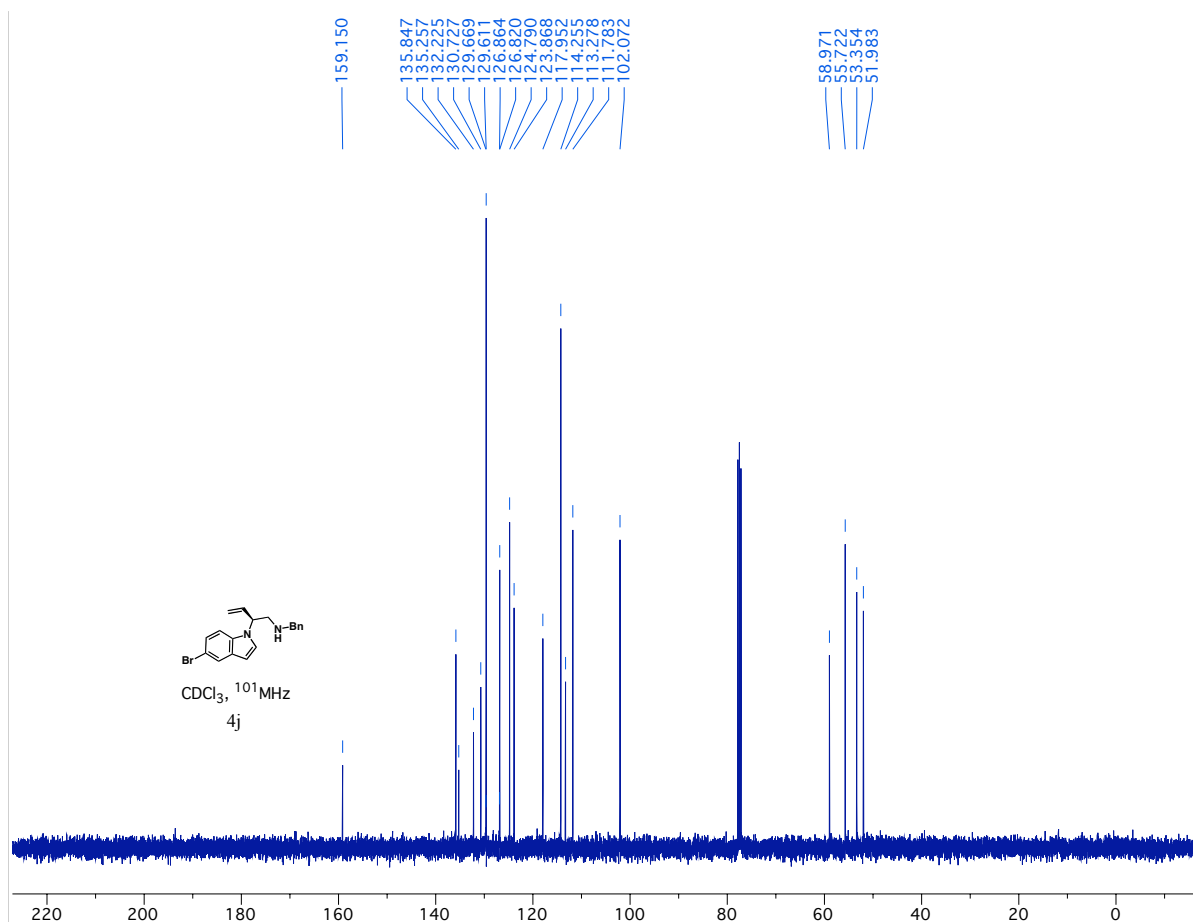

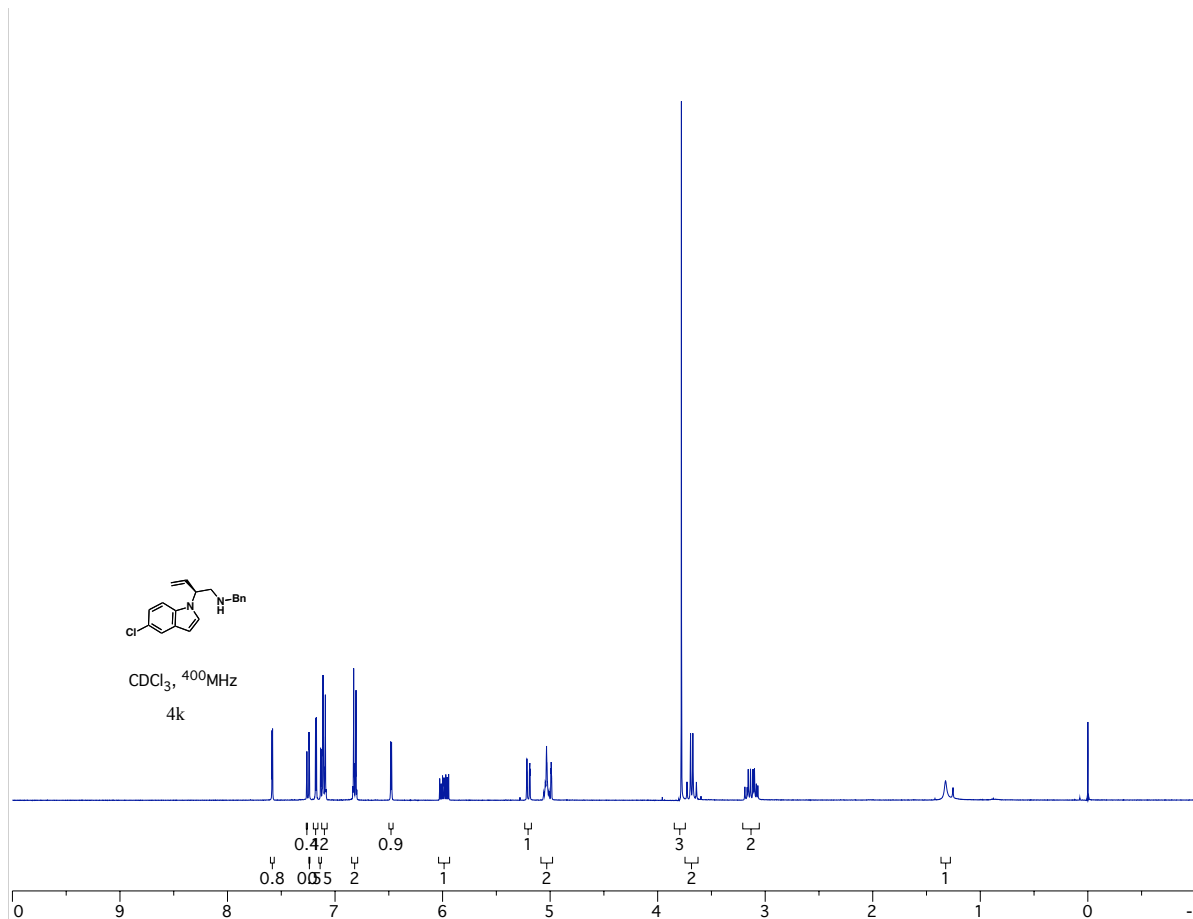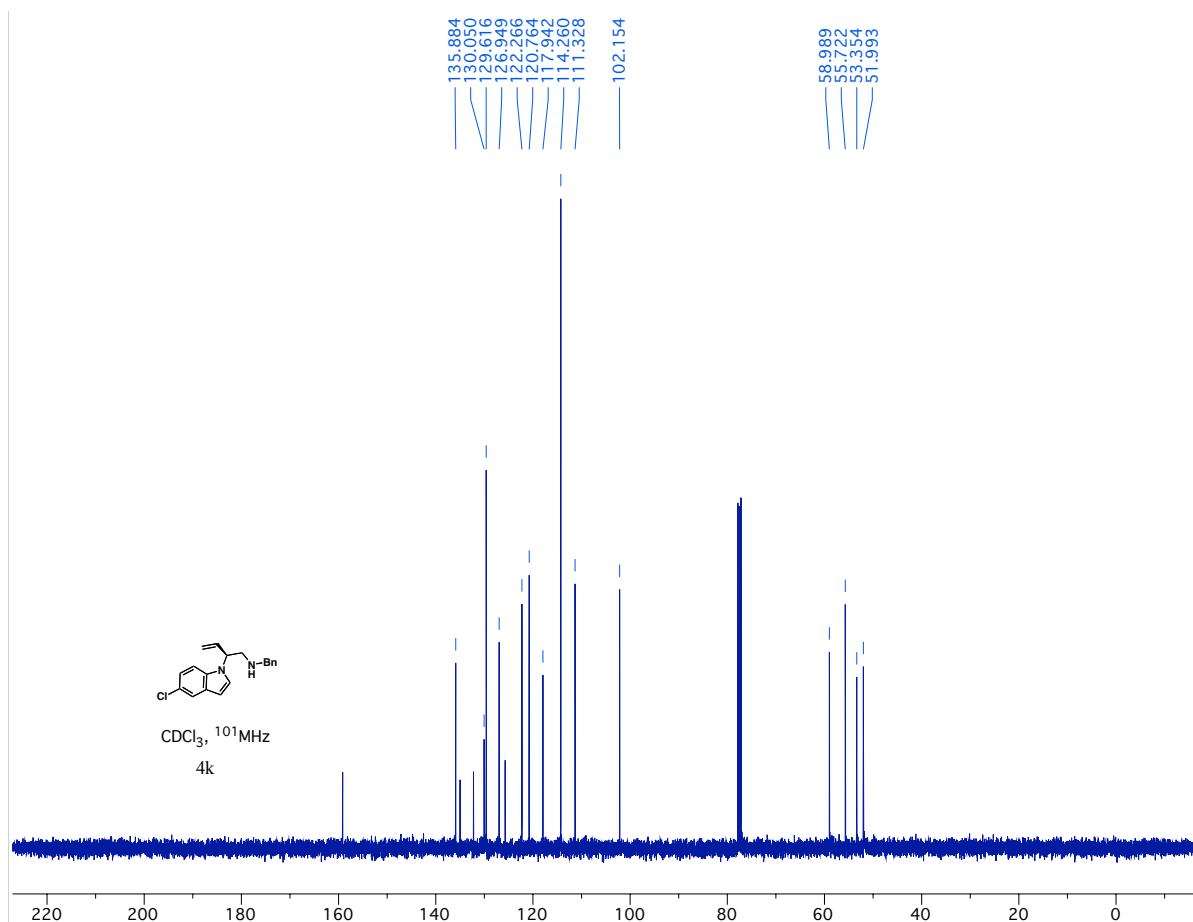

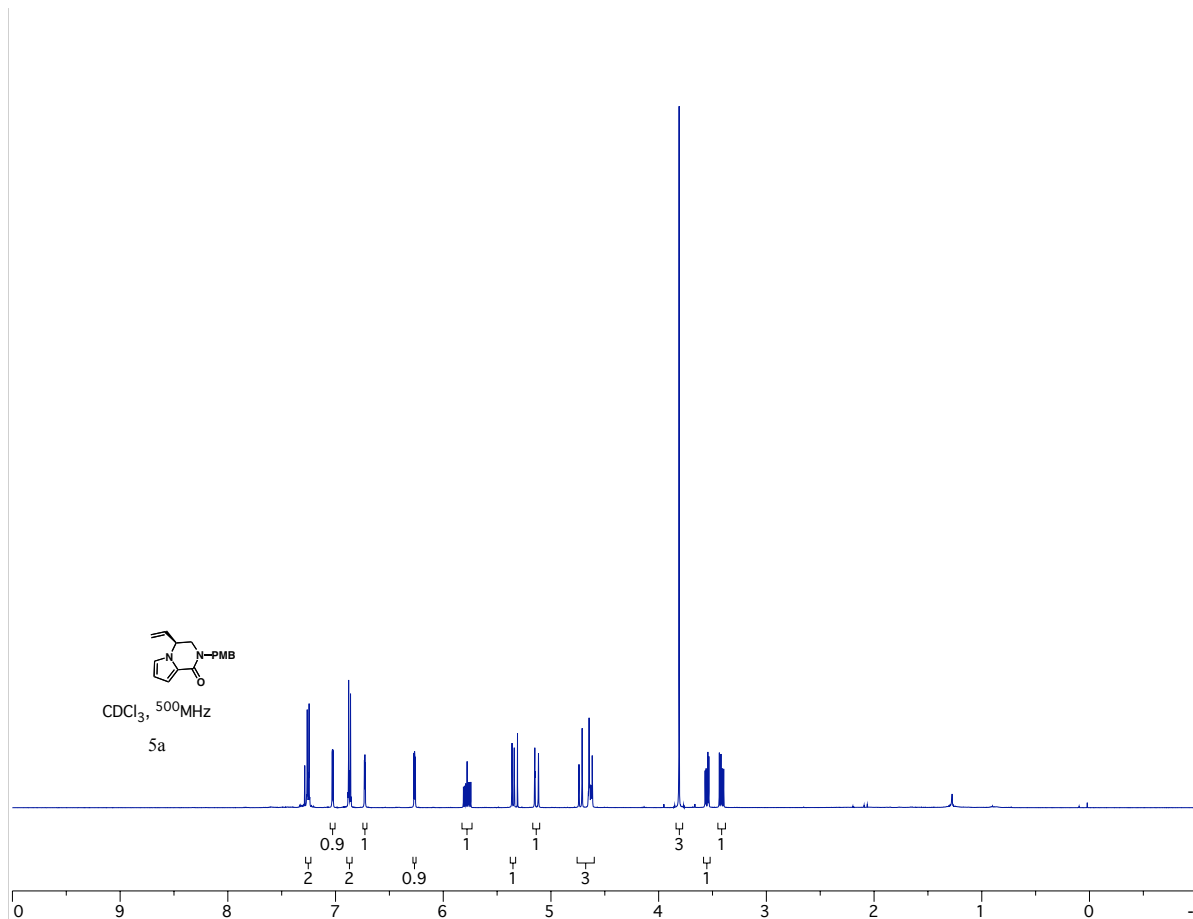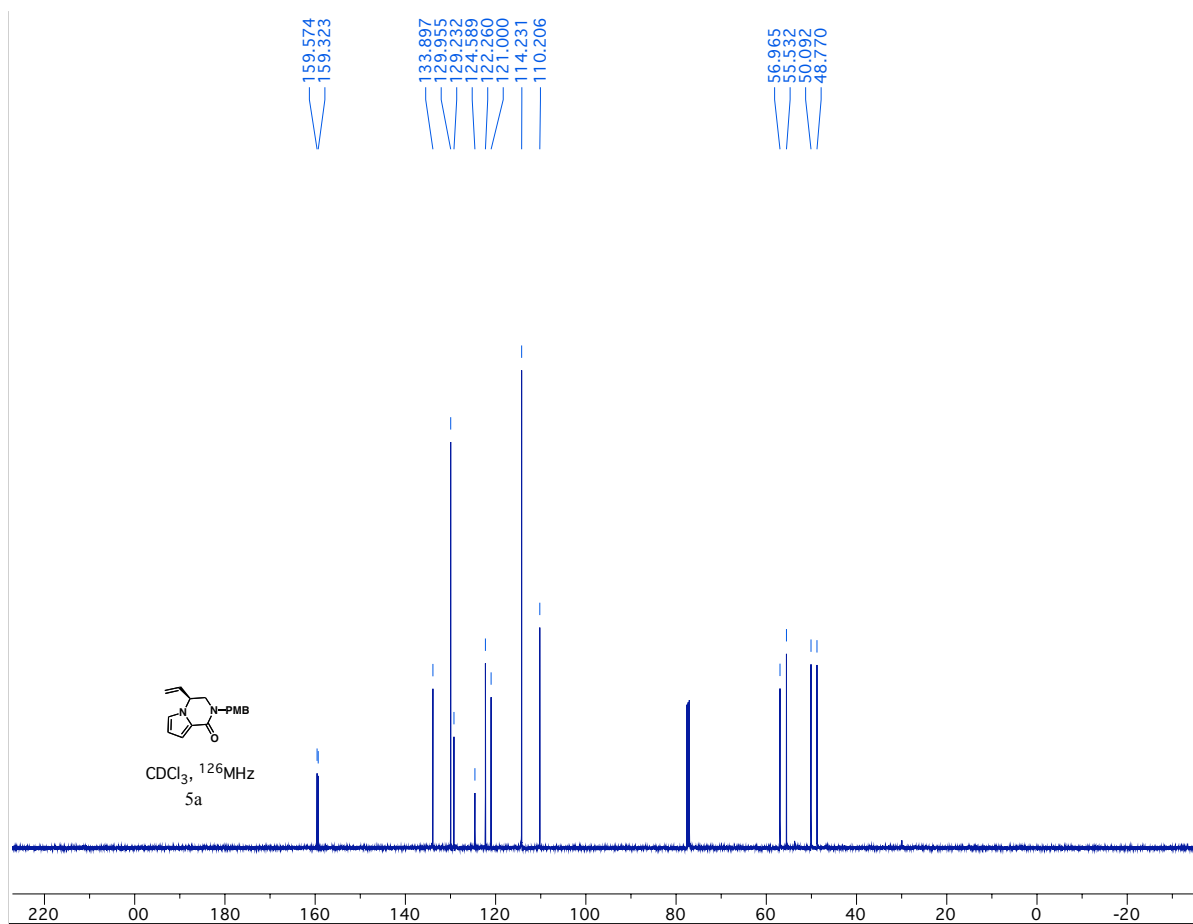

X-94-1A  
11-10-2006  
exp1 s2pu1

```
SAMPLE      DEC. & VT  
date Nov 10 2006 dn 499.751 H1  
solvent CDC13 dof 30  
file exp dpwr 0  
ACQUISITION exp dm 0  
sfrq 499.751 dm nmh  
in H1 dm C  
et 4.000 dmf 280  
np 64000 dsdq 1.0  
sw 9000.0 dras n  
fb not used homo n  
bs 4  
lpwr 60 drcq2 DECE 0  
pw 10.0 dn2  
d1 0 dpwr2 1  
tof 0 dot2 0  
nt 16 ds2 n  
ct 16 dm2 C  
clock n dm2 280  
getn not used dsq2  
FLAGS n drs2 1.0  
n homo2 n  
ll n  
ln n PROCESSING n  
dp y wfile  
hs nn proc ft  
DISPLAY fn 131072  
sp -249.8 math f  
wp 4747.6  
vs 151 werr  
sc 0 wexp  
wc 250 vbs  
hznm 18.39 vft  
ls 33.57  
rf1 5142.7  
rfp 3878.2  
th 7  
ins 100.000  
rm cdc ph
```

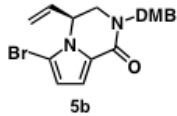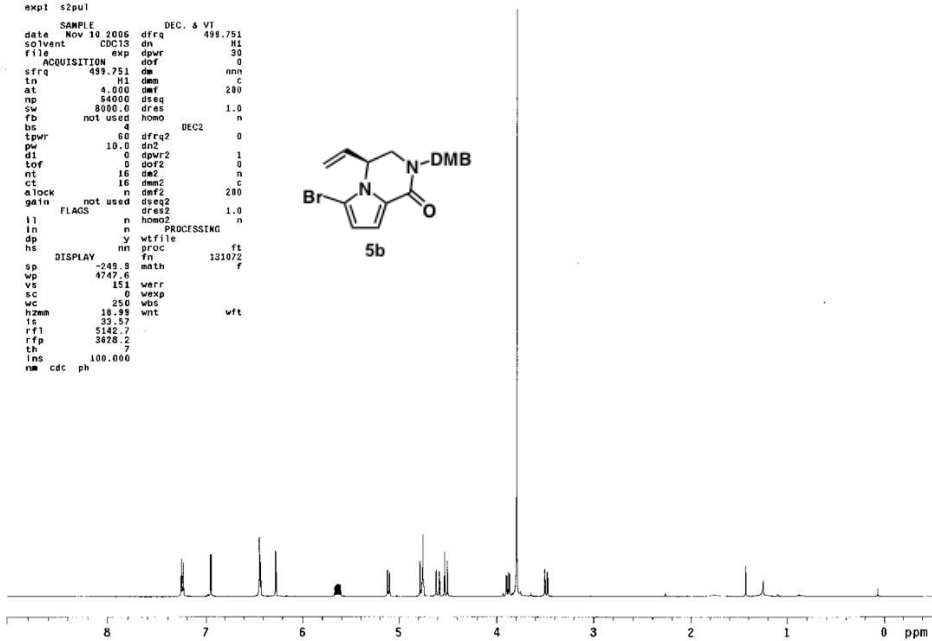

X-94-1A  
11-10-2006  
exp3 s2pu1

```
SAMPLE      DEC. & VT  
date Nov 10 2006 dn -499.0 H1  
solvent CDC13 dof 30  
file exp dm 300  
ACQUISITION exp dm 300  
sfrq 125.674 dmf 9561  
in C13 dpwr PROCESSING 0.50  
et 1.500 lb  
np 19816 fn not used  
sw 38003.3 math f  
fb not used  
bs 4  
pw 3.0 werr  
d1 3.0 wexp  
lpwr 54 vbs  
nt 100.0 vnt  
tof 1200 sp DISPLAY  
ct 189 wp -4607.0  
clock n vs 3302.8  
getn 54 SC 0  
FLAGS n wc 250  
ll n hznm 8.84  
ln n ls 500.00  
dp y rf1 14176.1  
hs nm rfp 9886.5  
th 4  
ins 100.000  
rm at ph 1.000
```

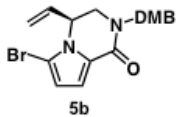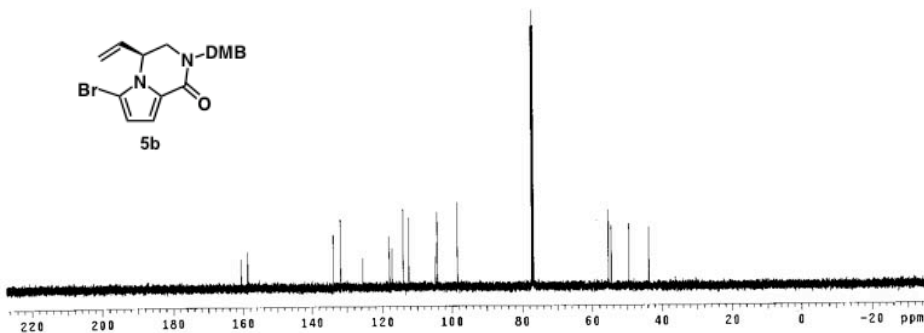



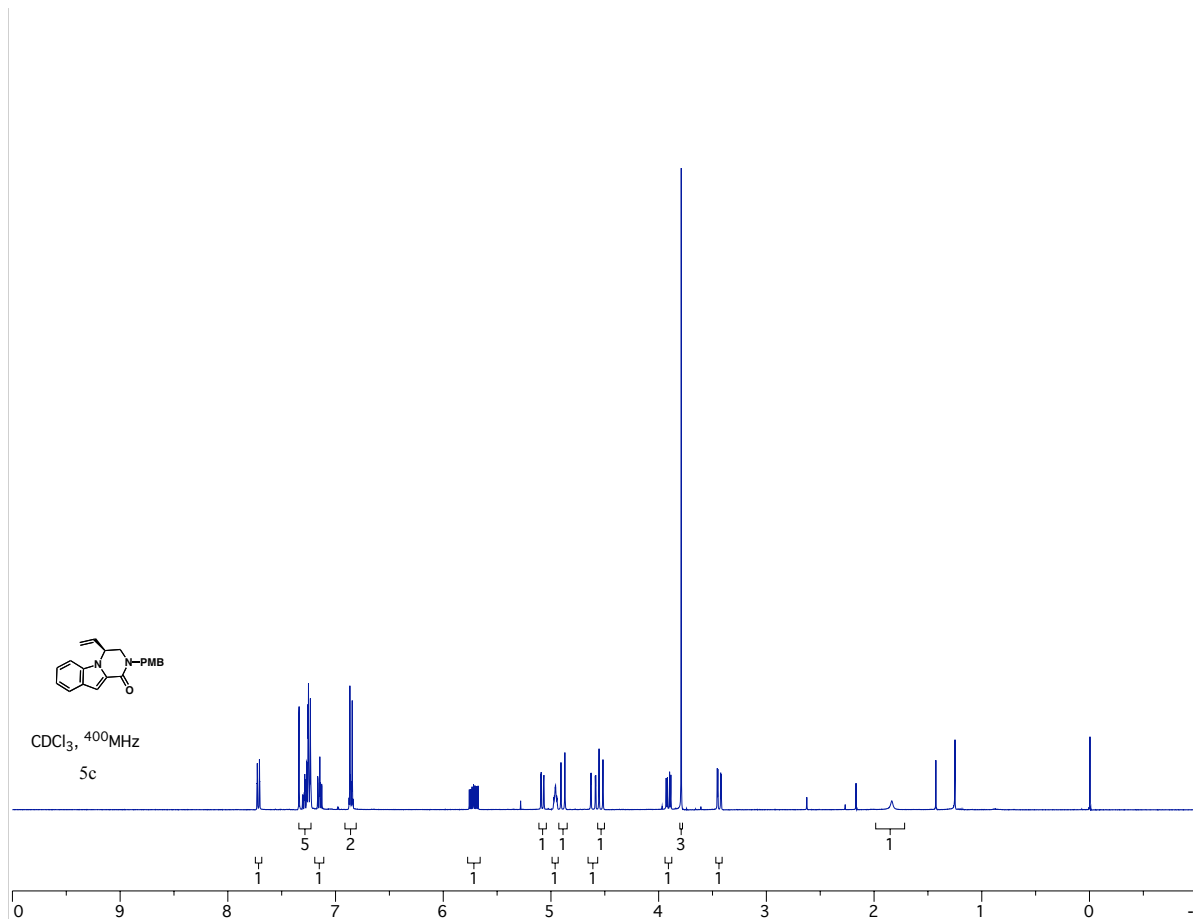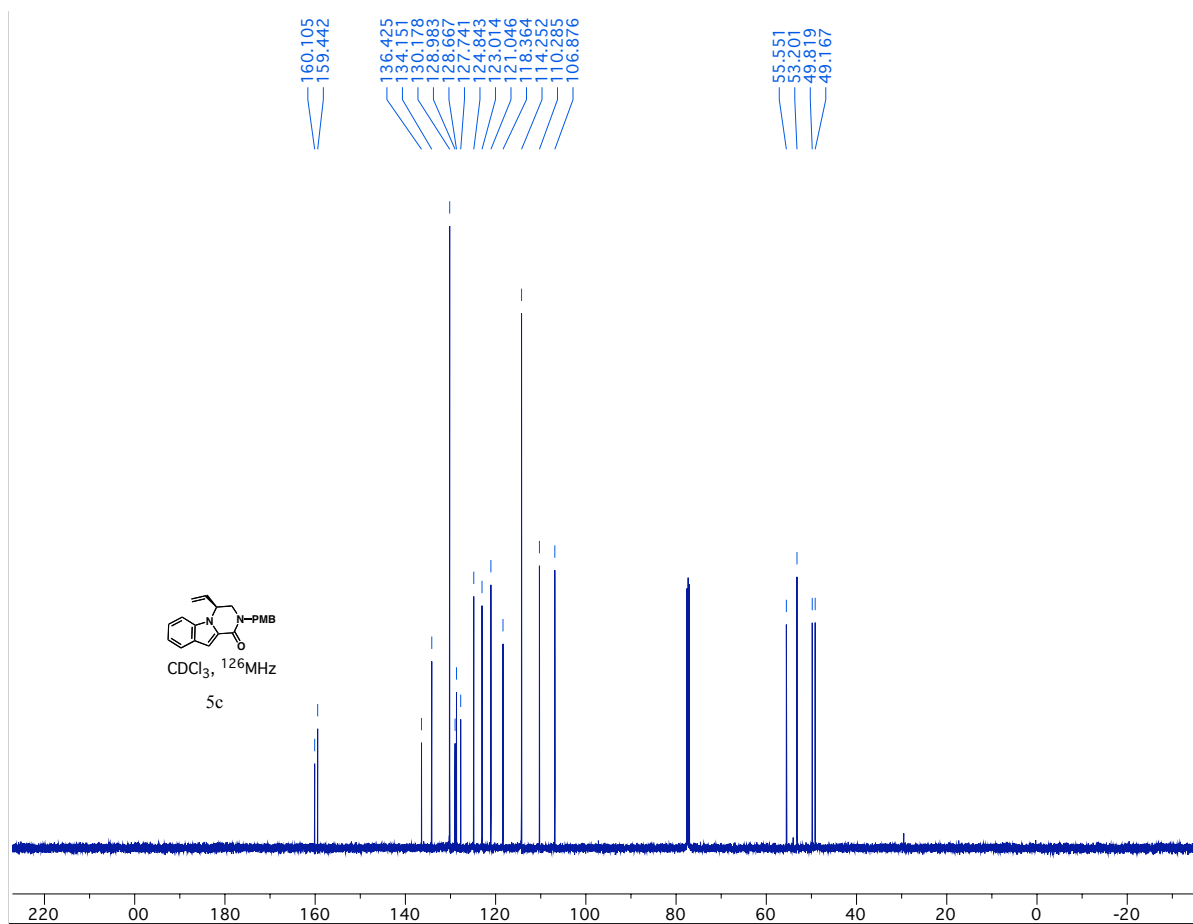

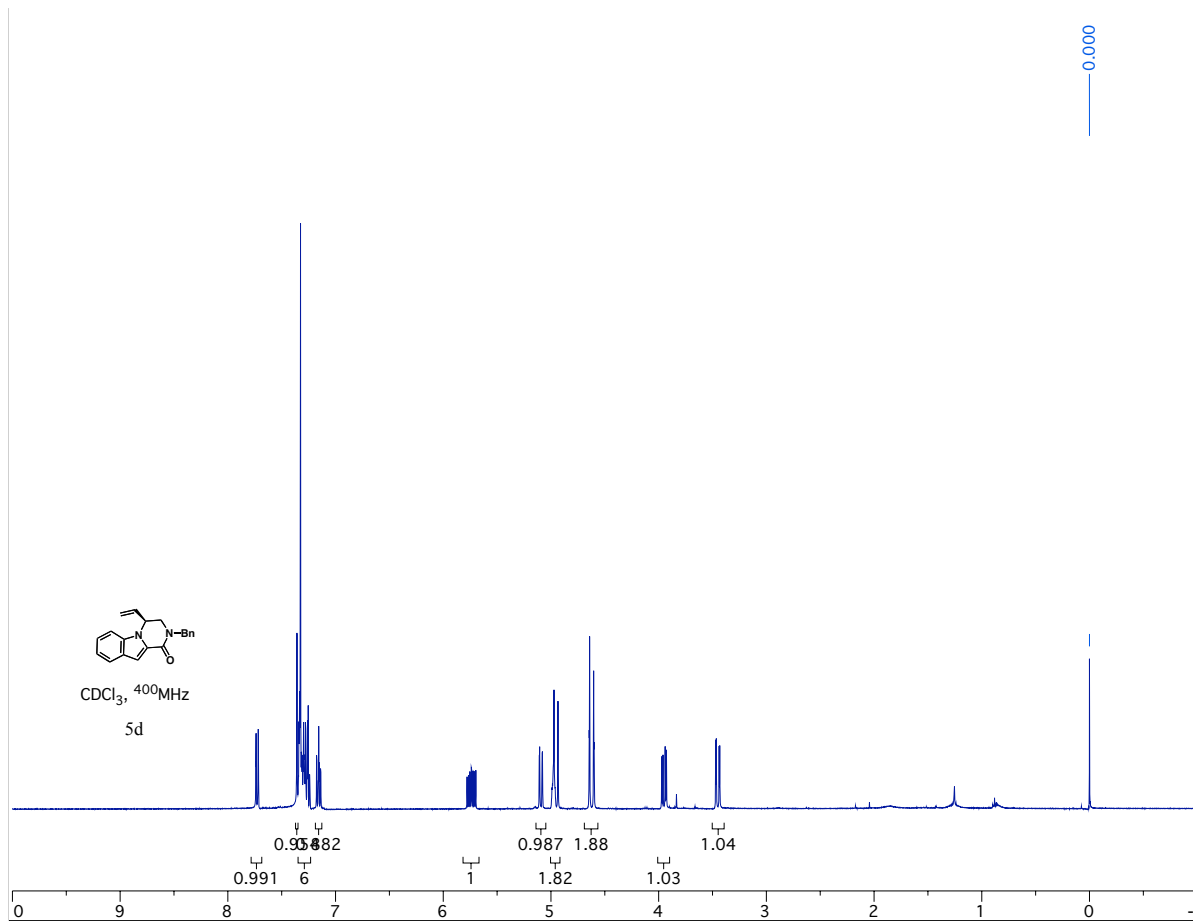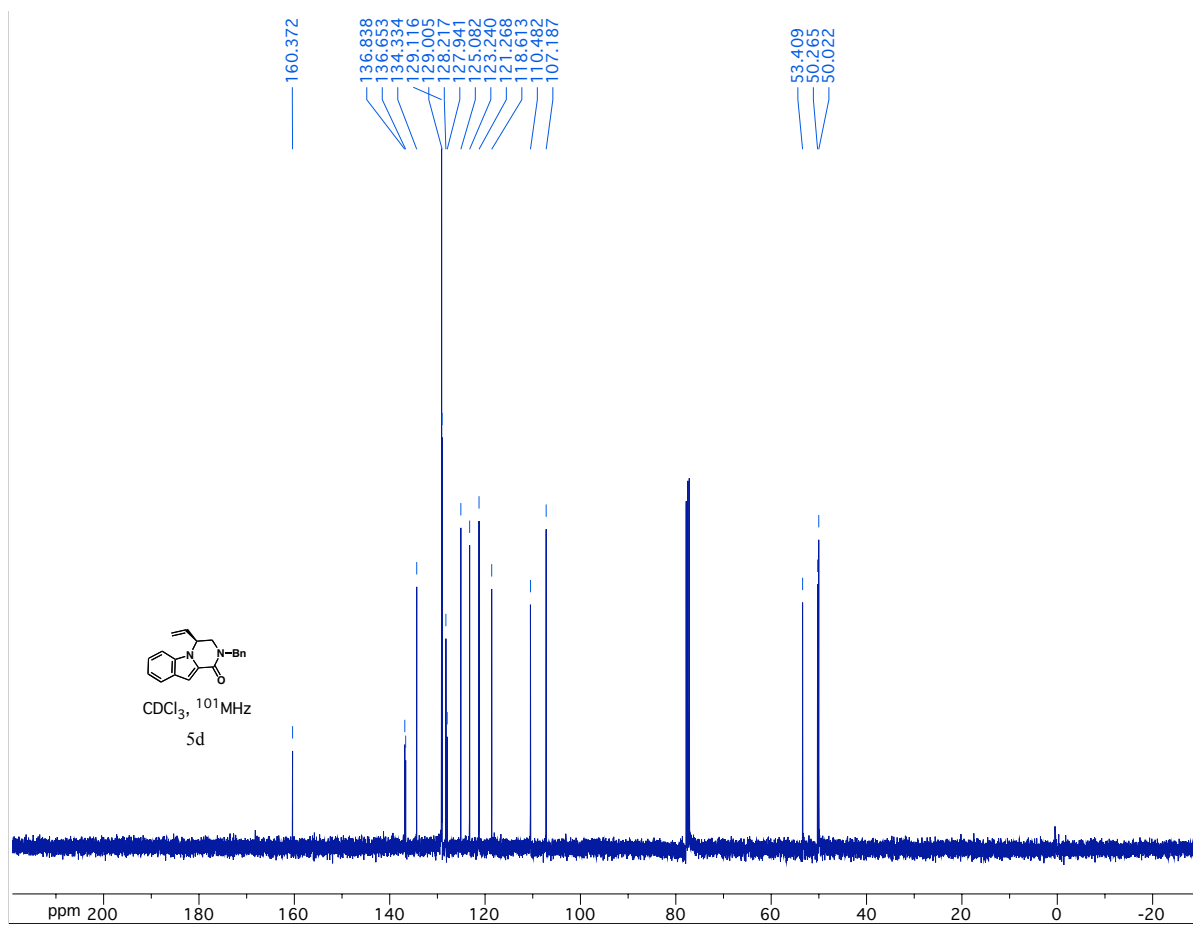

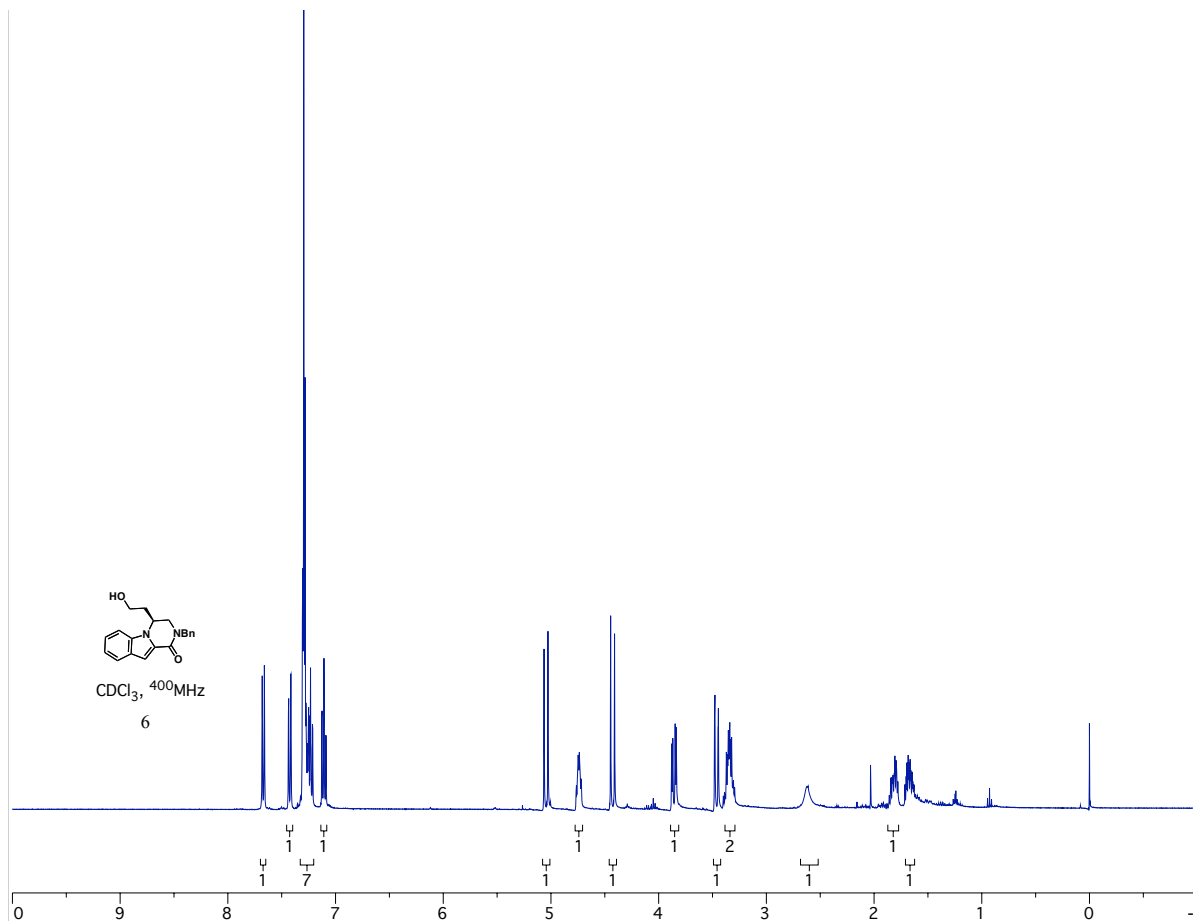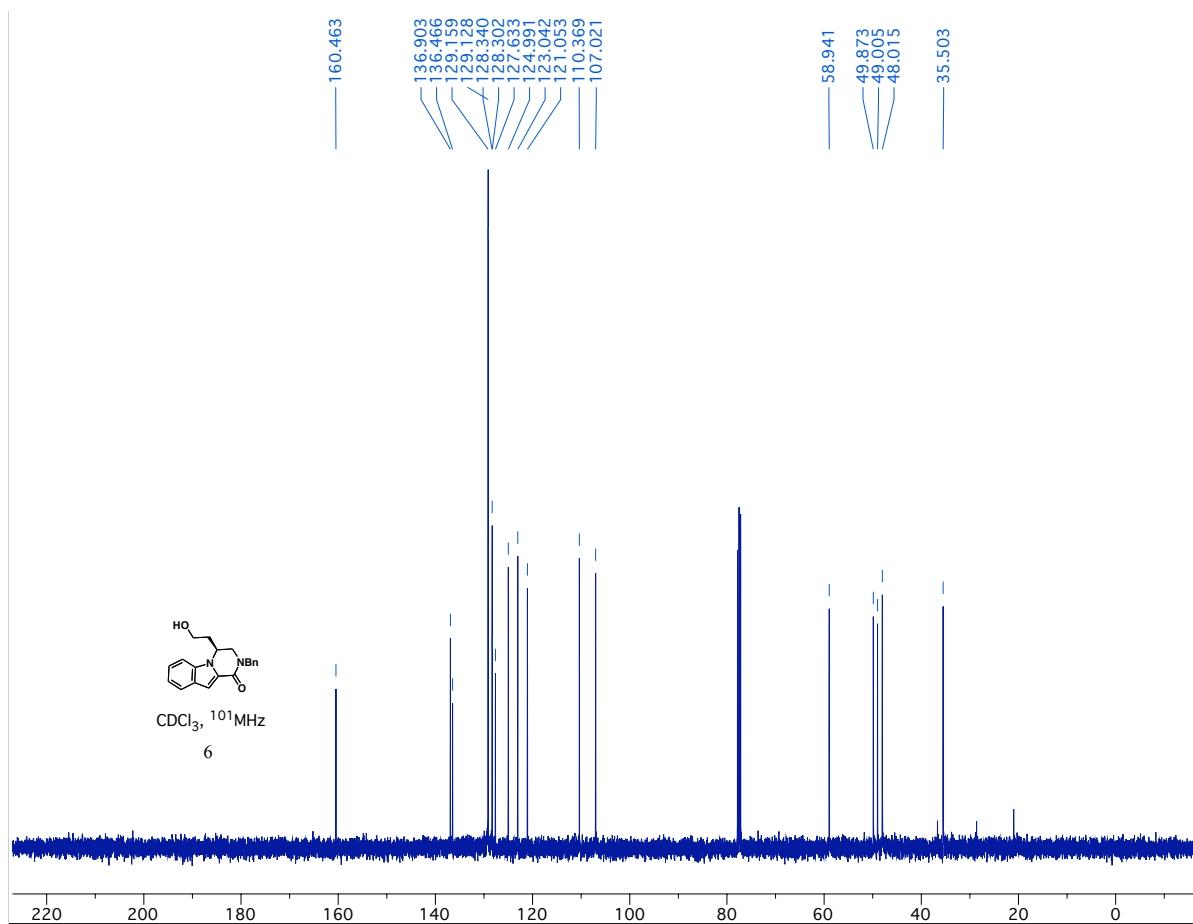

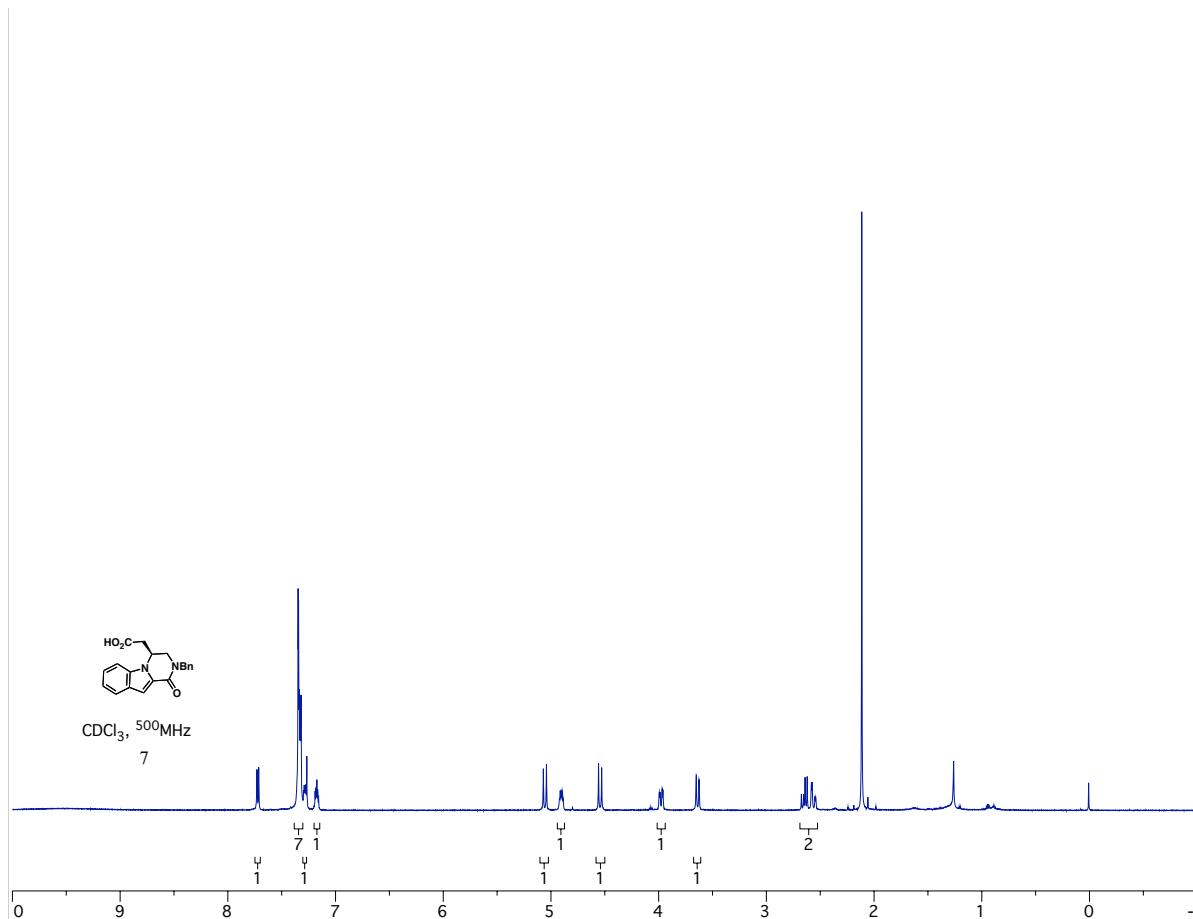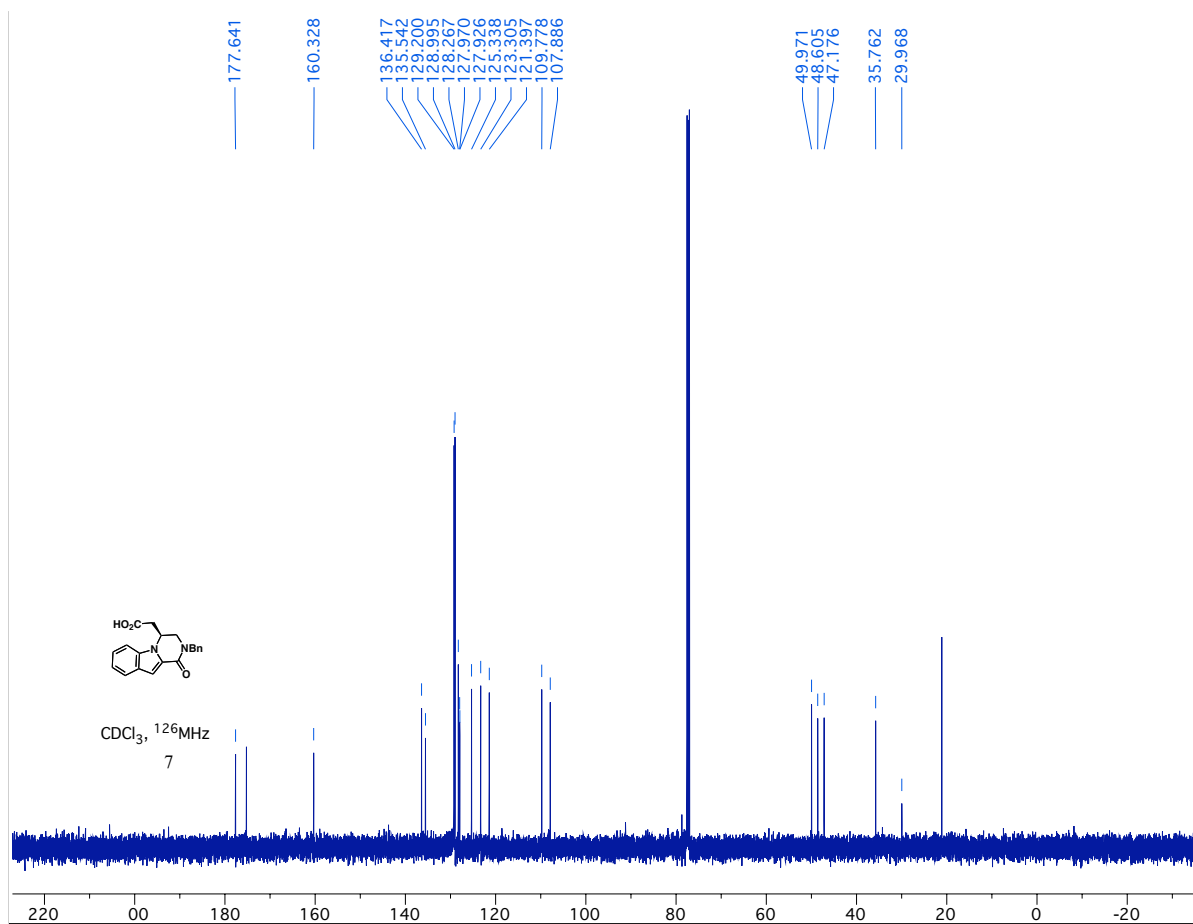

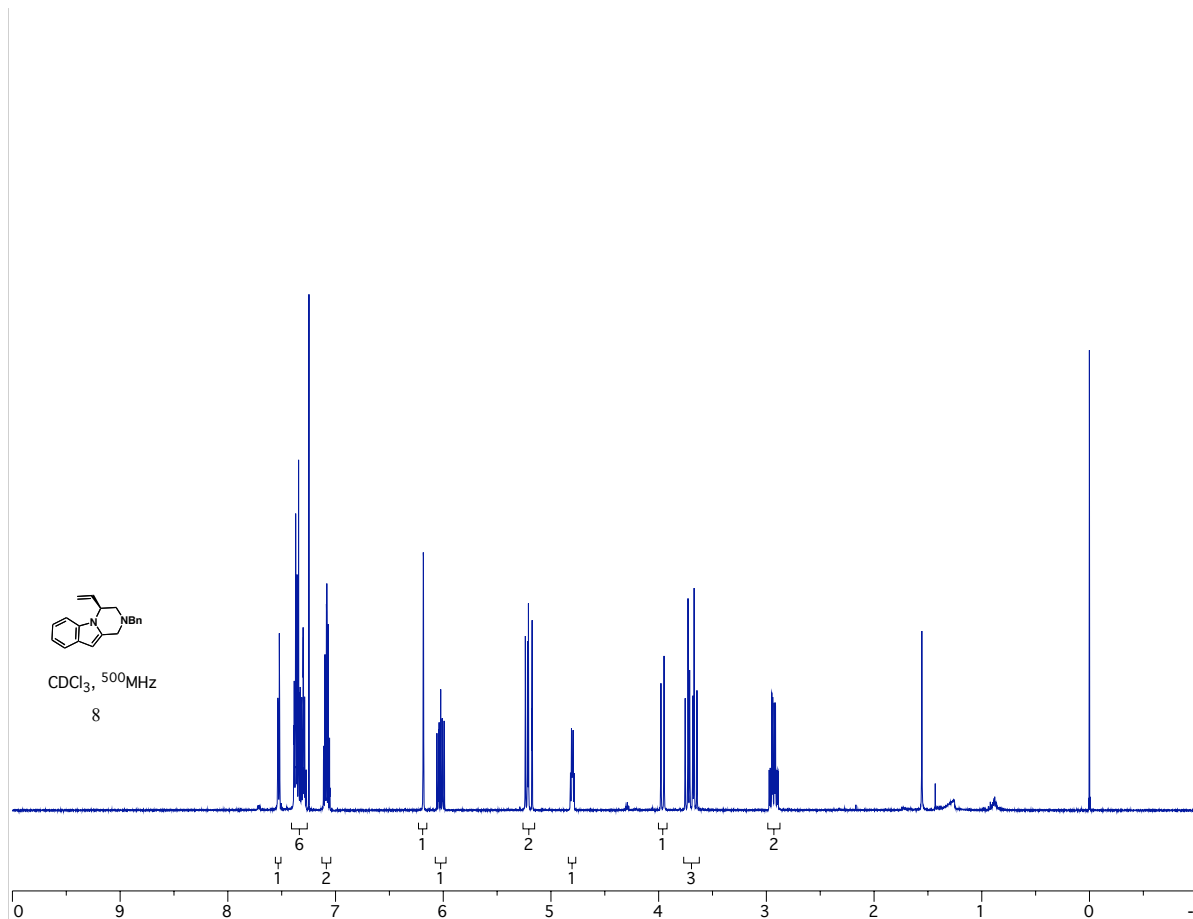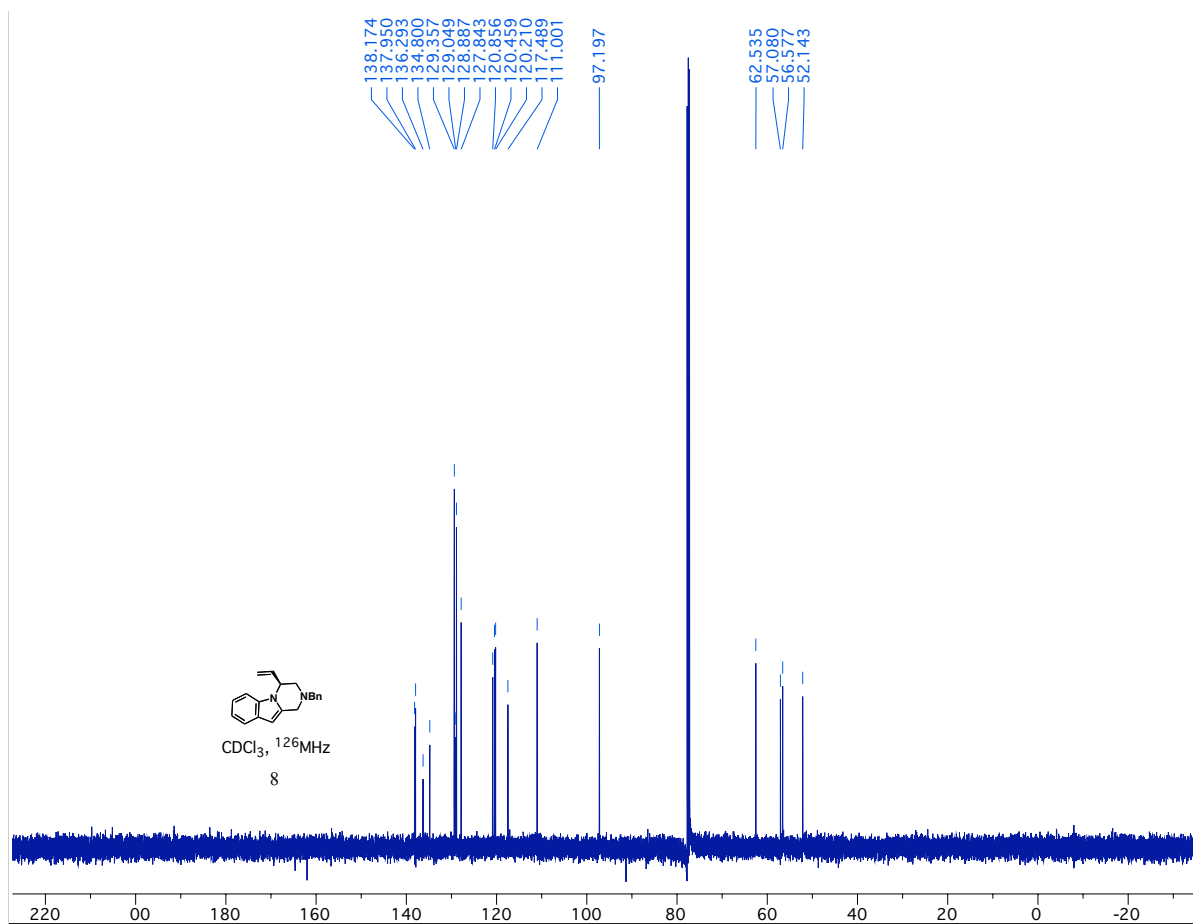

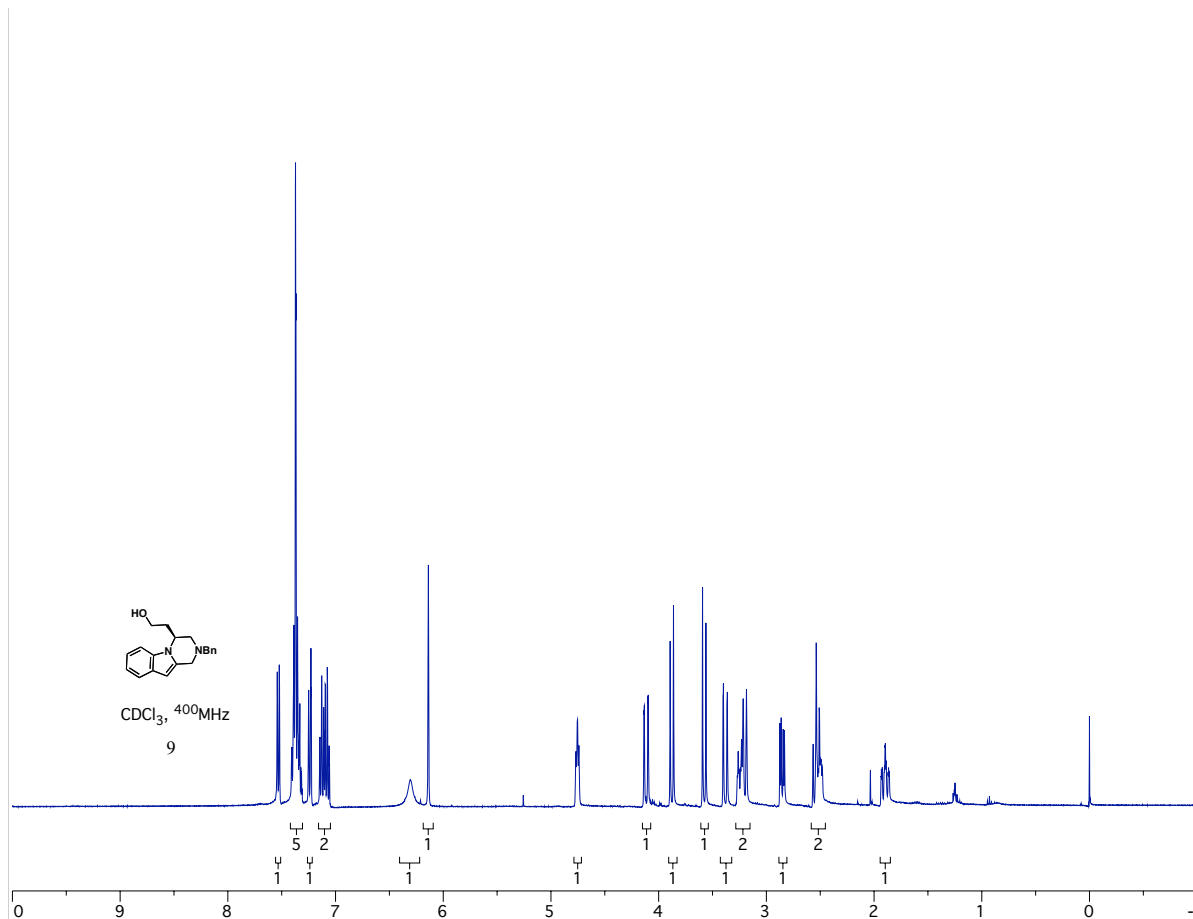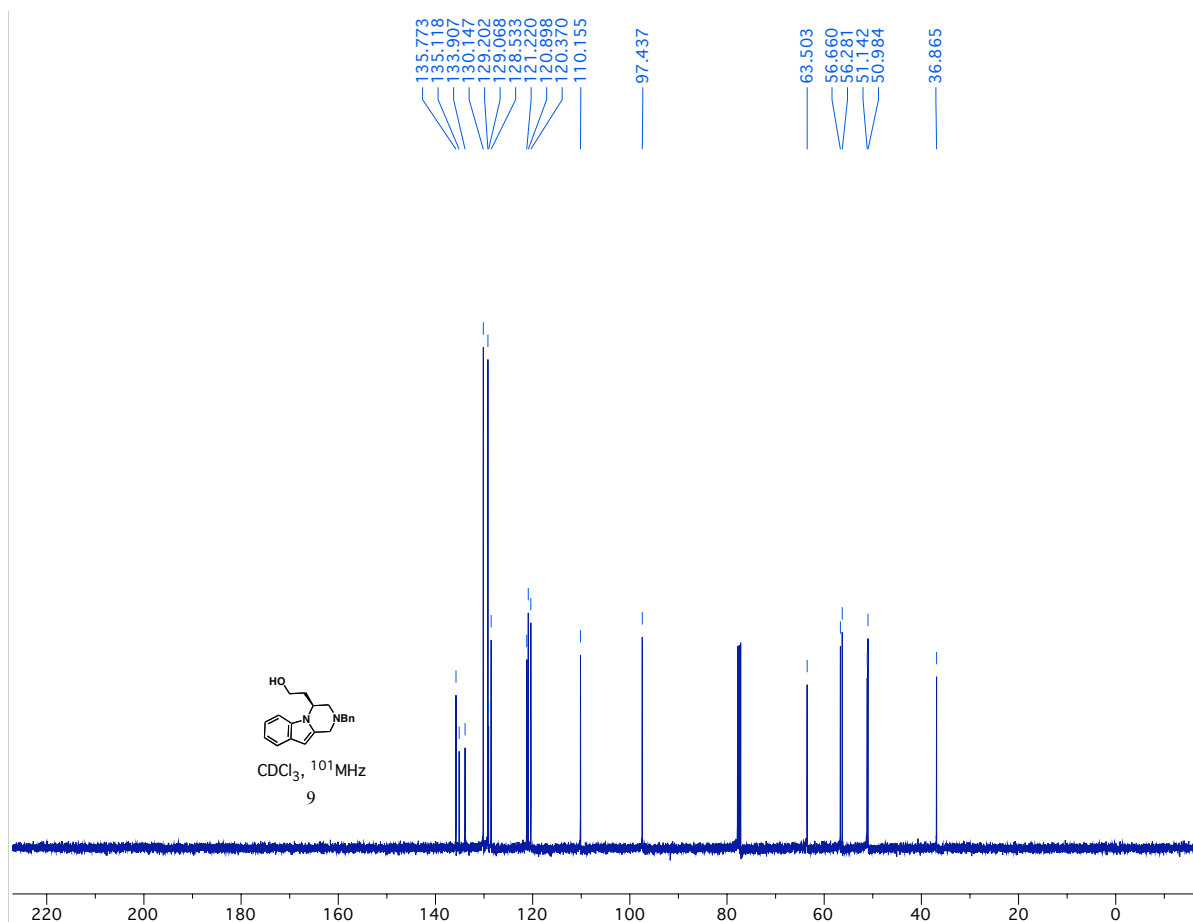

```

XI-32A
12-05-2006
exp1 s2pu1
SAMPLE DEC. & VT
date Dec 5 2006 dfrq 499.751 M1
solvent CDC13 d0 30
file exp d0w 0
ACQUISITION dof 0
sfrq 499.751 da mnm
tn n1 dm c
at 4.000 def 208
np 64000 dsq
sw 8000.0 drz 1.0
fb not used homo n
ds 6 dfrq2 DECZ 0
tpwr 10.0 dn2
d1 0 dpwr2 1
tof 0 dof2 0
nt 16 dm2 n
ct 18 demc c
alock n def2 200
gain not used dsq2 dres2 1.0
FLAGS n homo2 n
ii n PROCESSING n
in y wfile ft
dp mn pLOC
hs DISPLAY fn 131072
sp -249.9 math f
wp 4747.6
vs 140 weff
sc 0 wexp
wc 250 wbs
hzmm 18.89 wnt wft
ls 435.11
rfl 5142.2
rff 3828.2
th 7
ins 0.850
nm cdc ph

```

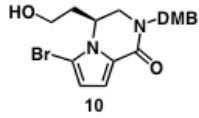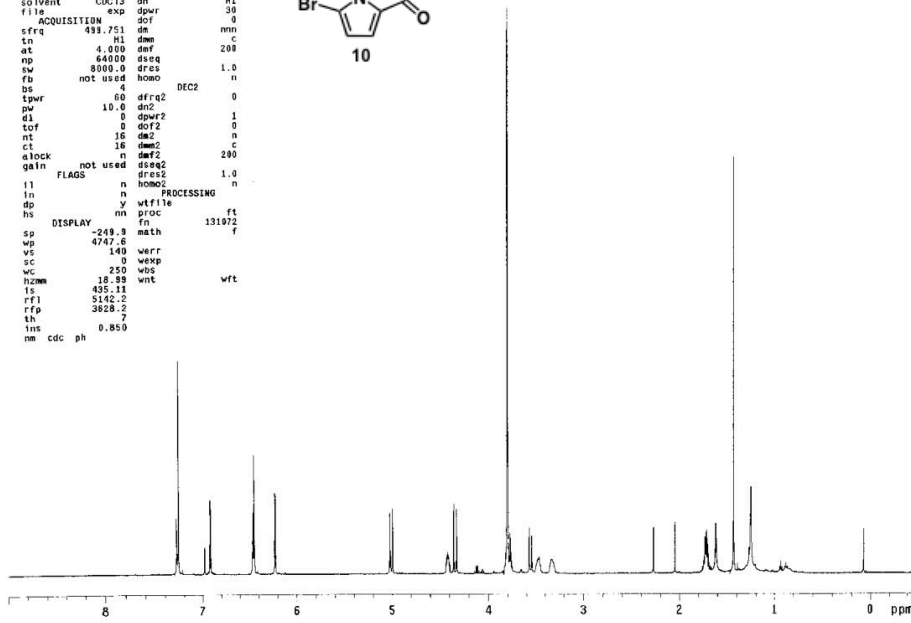

```

XI-32A
12-05-2006
exp3 s2pu1
SAMPLE DEC. & VT M1
date Dec 5 2006 dn -499.0
solvent CDC13 dof 30
file exp dm 30
ACQUISITION dm 30
sfrq 125.874 dm 8561
tn n1 dm w
at 1.500 PROCESSING 0.50
np 8808 lb not used
sw 33682.3 fn not used
fb not used math f
bs 8
pw 3.0 weff
d1 180.0 wexp
tpwr 54 wbs
tof 0.508 wnt DISPLAY
nt 1200 sp -669.3
ct 364 wp 21947.0
alock n vs 1855
gain 54 vc 250
FLAGS n hzmm 87.79
ii n ls 880.98
in y rfl 14373.6
dp mn rfd 3688.5
hs th 6
ins ph 1.000
at

```

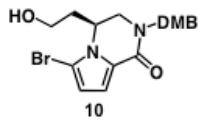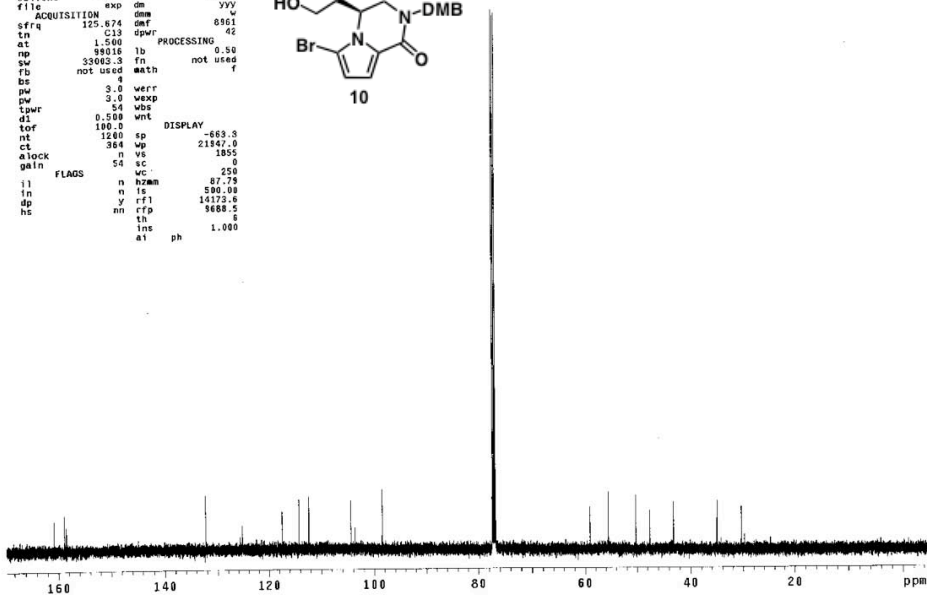

XI-77A-H  
01-24-2007

expl std1h

SAMPLE DEC. & VT  
date Jan 24 2007 dfrq 400.115  
solvent CD3OD dn H1  
file exp dpwr 30  
ACQUISITION dof 8  
sfrq 400.115 dm nnn  
tn H1 dm c  
at 4.092 def 200  
np 40000 PROCESSING  
sw 4827.5 wfile ft  
fb not used proc not used  
bs 1 fn not used  
tpwr 81  
pw 8.0 wevr  
d1 0.500 weps  
tof 16 wbs  
nt 16 wnt  
ct 16  
alock n  
gain not used  
FLAGS  
l1 n  
ln n  
dp y  
DISPLAY  
sp -200.2  
vp 3801.0  
vs 132  
sc 0  
wc 250  
hzmm 15.20  
ls 321.09  
rf1 1324.4  
rfp 1324.4  
ln 6  
lms 1.000  
nm cdc ph

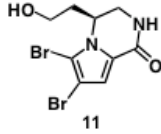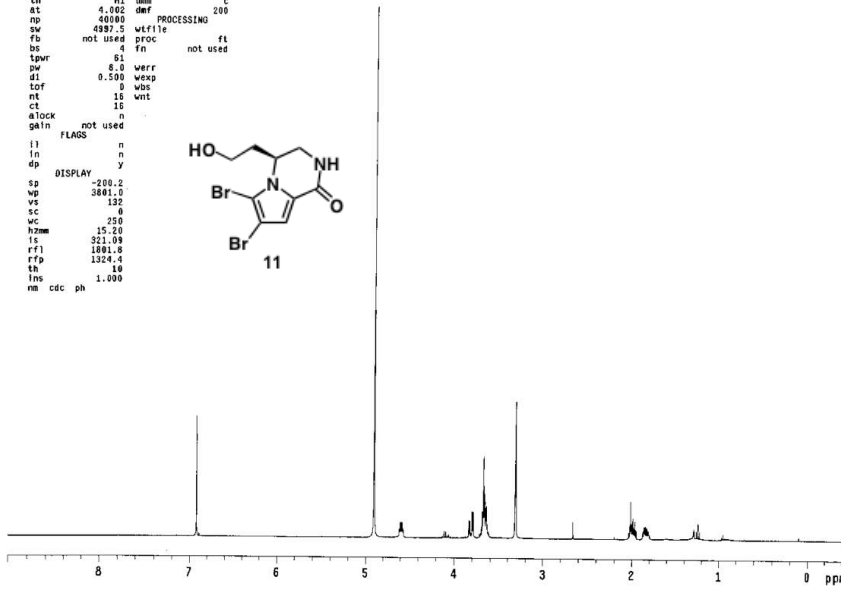

XI-78A  
01-24-2007

exp3 std13c

SAMPLE DEC. & VT  
date Jan 24 2007 dfrq 400.115  
solvent CD3OD dn H1  
file exp dpwr 43  
ACQUISITION dof 8  
sfrq 100.618 dm yyy  
tn C13 dm w  
at 1.198 def 8100  
np 59188 PROCESSING  
sw 25000.0 lb 1.00  
fb 13800 wfile  
bs 16 proc ft  
tpwr 53 fn not used  
pw 4.5  
d1 0.500 wevr  
tof 0 weps  
nt 1200 wbs  
ct 192 wnt  
alock n  
gain not used  
FLAGS  
l1 n  
ln n  
dp y  
DISPLAY  
sp -2858.5  
vp 25000.0  
vs 200  
sc 0  
wc 250  
hzmm 5.54  
ls 500.00  
rf1 7280.3  
rfp 4829.8  
ln 6  
lms 100.000  
nm no ph

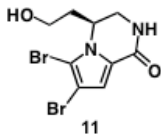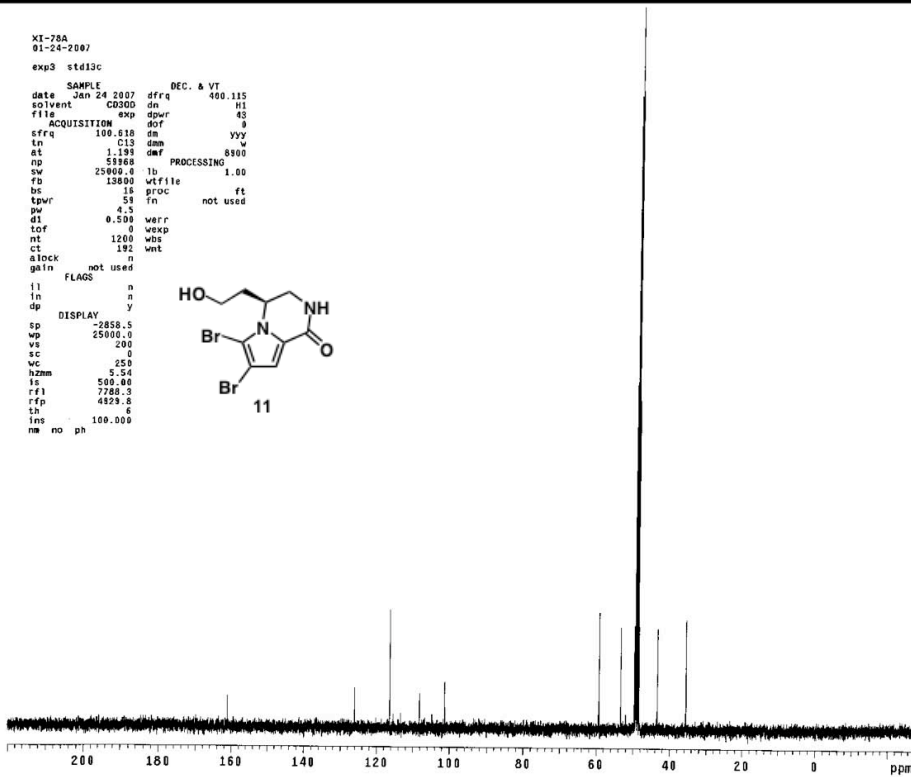



XI-79A  
01-25-2007

expl s2pu1

```
SAMPLE DEC. & VT
date Jan 25 2007 dfrq 499.753
solvent CDCl3 d1 H1
file exp dpr H1
ACQUISITION dof 0
sfrq 499.753 dm nmm
tn H1 dm C
at 4.000 dar 200
np 64000 dseq 1.0
sw 8000.0 dres n
fa not used homo n
bs 4 DECI 0
tpr 60 dfrq 0
pw 10.0 d2 1
d1 0 dpr2 1
tof 0 drc 0
nt 120 dm2 n
cl 20 dm2 c
dlock n DMF2 200
gain not used dteet 1.0
FLAG n homo n
il n n
in n PROCESSING n
dp y wfile ft
hs mm proc f
DISPLAY fn 131072 f
sp -249.0 math
wp 4747.5 werr
vs 113 wexp
sc 250 wnt
h2mm 10.89 wnt
ls 33.57
rf1 3165.0
rfp 1854.2
th 7
ins 100.000
nm cdc ph
```

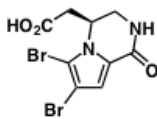

12; longamide B

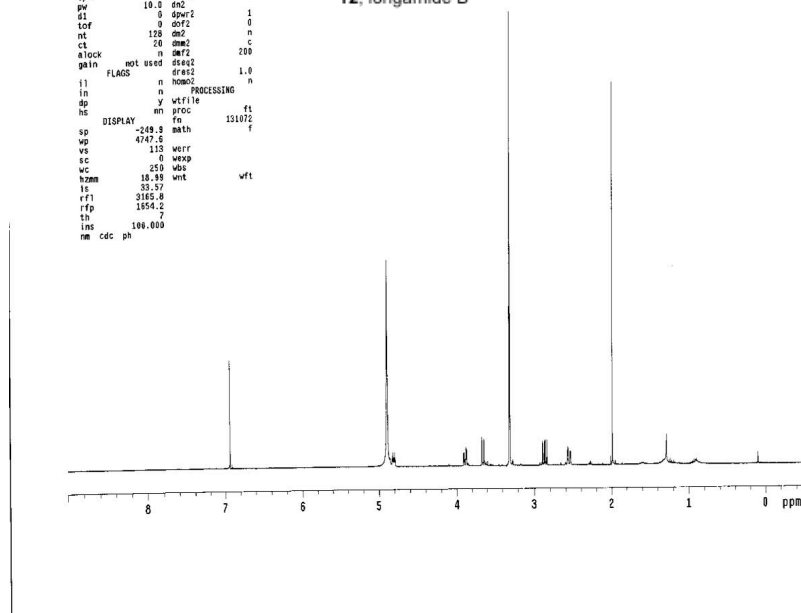

XI-86A  
02-13-2007

expl stdih

```
SAMPLE DEC. & VT
date Feb 13 2007 dfrq 400.115
solvent DMSO d1 H1
file exp dpr H1
ACQUISITION dof 0
sfrq 400.115 dm nmm
tn H1 dm C
at 4.002 dar 200
np 40000 PROCESSING
sw 4997.5 wfile ft
fa not used proc n
bs 4 fn not used
tpr 61
pw 8.0 werr
d1 0.500 wexp
tof 16 wnt
nt 16
cl 16
dlock n
gain not used
FLAG n
il n
in n
dp y
DISPLAY fn
sp -280.6
wp 4801.2
vs 96
sc 0
wc 250
h2mm 19.21
ls 281.78
rf1 1473.2
rfp 956.3
th 29
ins 1.000
nm cdc ph
```

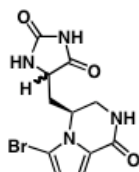

H<sup>+</sup> agesamide A (15)  
H<sup>+</sup> agesamide B (16)

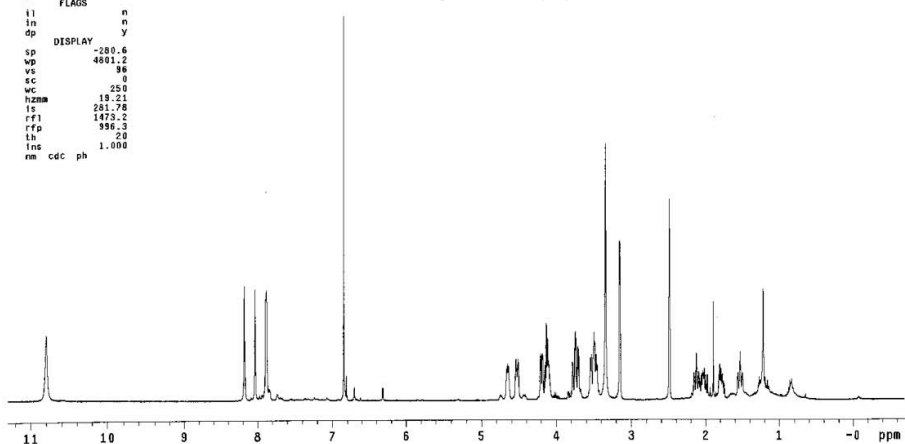

```

XI-86A
02-13-2007
exp3 std13c
SAMPLE
date Feb 13 2007 dfrs DEC. & VR 400.115
solvent DMSO dn HI
file /export/home/r-dpr 43
gbdong/XI-86A-C.f1- dof 0
yy yyy d dm
ACQUISITION dmm dmw
sfrq 100.618 dmf PROCESSING 8800
tn C13
at 1.193 lb 1.00
no 53960 wtrfile
sw 25000.0 proc fl
fb 13000 fn not used
bs 15
tpwf 53 werr
pw 4.3 wexp
d1 0.500 wbs
tof 0 wnt
nt 1200
ct 832
clock n
gain not used
FLAGS n
l1 n
ln n
dp y
DISPLAY
sp -3000.5
wp 24899.2
vs 450
sc 0
wc 250
hzmm 100.00
is 500.00
rft 7015.2
rtp 3853.3
th 0
ins 100.000
ms no ph

```

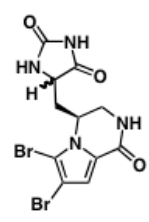

H— agesamide A (15)  
H— agesamide B (16)

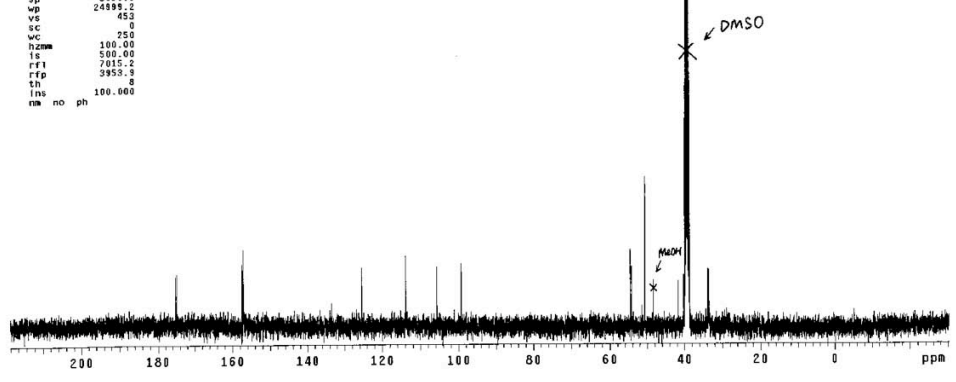

Supplement: NIHMS246309-supplement-1_si_001.pdf [file NIHMS246309-supplement-1_si_001.pdf]
